# Supplementary material for: Integrative Multi-Omics Analysis Identifies GZMK as a Causal and Druggable Target in Knee Osteoarthritis
Source: Research Square preprint supplement (doi:10.21203/rs.3.rs-6976599/v1), 2025-07-10
Supplement: Supplementary file 1 [file 73bcd222692c6d908a42234c.xlsx]

## Sheet: Sheet1
Differential Gene Expression Analysis Between OA and Control Groups
Gene	logFC	AveExpr	t	P.Value	adj.P.Val	change
N4BP2	1.20032	6.60707	10.3742	8.67e-17	1.26e-12	UP
ENAH	0.949734	10.3989	9.57868	3.5e-15	2.55e-11	NOT
CBX4	1.34783	8.24145	9.14706	2.63e-14	1.28e-10	UP
CEPT1	0.859758	8.33321	9.01686	4.83e-14	1.76e-10	NOT
COX18	0.692943	7.57398	8.78526	1.42e-13	4.15e-10	NOT
NOL8	0.661033	8.25952	8.70901	2.03e-13	4.43e-10	NOT
GAPVD1	0.625507	8.76462	8.69917	2.13e-13	4.43e-10	NOT
SYNRG	0.707632	8.56913	8.65957	2.56e-13	4.67e-10	NOT
ZNF423	1.22005	9.06372	8.54441	4.38e-13	7.1e-10	UP
STX6	0.55394	8.19662	8.38481	9.23e-13	1.11e-09	NOT
CTNS	0.712214	7.22232	8.37933	9.47e-13	1.11e-09	NOT
ALG1	0.946266	6.36688	8.37533	9.64e-13	1.11e-09	NOT
UGCG	0.875589	8.49745	8.36918	9.92e-13	1.11e-09	NOT
ZNF385D	1.12213	7.44472	8.33665	1.15e-12	1.2e-09	UP
ISM1	1.7367	8.81728	8.30003	1.37e-12	1.27e-09	UP
PLD1	1.11513	8.0769	8.29708	1.39e-12	1.27e-09	UP
NHLRC3	0.570908	8.63372	8.26348	1.62e-12	1.39e-09	NOT
B4GALT1	0.815599	9.4084	8.21737	2.01e-12	1.6e-09	NOT
DLG4	1.22237	6.47712	8.20978	2.08e-12	1.6e-09	UP
MOB3A	0.843418	8.56472	8.18987	2.29e-12	1.67e-09	NOT
ZNF529	0.78179	7.6857	8.16837	2.53e-12	1.75e-09	NOT
ENG	1.10739	10.0976	8.13911	2.9e-12	1.86e-09	UP
GALC	0.816355	8.8995	8.13578	2.94e-12	1.86e-09	NOT
PHF12	0.757895	8.25146	8.07187	3.96e-12	2.4e-09	NOT
LTBP3	1.46879	11.5771	8.02067	5.02e-12	2.93e-09	UP
ARMCX2	0.921849	8.80222	8.00246	5.46e-12	3.02e-09	NOT
SHC1	0.872609	10.6422	7.99705	5.6e-12	3.02e-09	NOT
ZNF329	0.846844	6.96738	7.97406	6.23e-12	3.25e-09	NOT
ATP6V1C1	0.613728	8.5358	7.96306	6.56e-12	3.3e-09	NOT
TRRAP	0.726471	8.41373	7.92949	7.66e-12	3.6e-09	NOT
CASP2	0.709599	8.28747	7.92713	7.75e-12	3.6e-09	NOT
SKI	1.46843	10.2308	7.92279	7.9e-12	3.6e-09	UP
MAN2A1	0.748905	9.05353	7.86385	1.04e-11	4.59e-09	NOT
TMEM87B	0.769564	8.0652	7.81681	1.29e-11	5.54e-09	NOT
KIAA0895L	1.46645	7.09008	7.78957	1.46e-11	6.1e-09	UP
STAT2	0.764129	10.1744	7.76183	1.66e-11	6.73e-09	NOT
PHLDB1	-0.758854	7.63199	-7.75647	1.71e-11	6.73e-09	NOT
SLC45A4	0.886267	7.0276	7.6888	2.33e-11	8.89e-09	NOT
GJB2	3.28958	7.98058	7.6847	2.38e-11	8.89e-09	UP
MINK1	0.93583	9.24412	7.66666	2.58e-11	9.39e-09	NOT
CORO1B	0.870401	9.07949	7.66193	2.64e-11	9.39e-09	NOT
GIT2	0.702168	9.10238	7.64536	2.85e-11	9.78e-09	NOT
SH3KBP1	0.579264	9.79697	7.63881	2.94e-11	9.78e-09	NOT
STARD3NL	0.678365	8.56236	7.6378	2.95e-11	9.78e-09	NOT
LGALS8	0.694391	8.93873	7.62888	3.08e-11	9.96e-09	NOT
NUP50	0.593385	8.49636	7.62414	3.14e-11	9.96e-09	NOT
SLC38A10	0.917509	9.53417	7.60526	3.43e-11	1.06e-08	NOT
PCSK5	1.06112	8.48347	7.60189	3.48e-11	1.06e-08	UP
ARHGEF18	0.780616	8.57136	7.5893	3.69e-11	1.1e-08	NOT
SLC39A11	0.818647	7.03523	7.56862	4.06e-11	1.18e-08	NOT
PTGDS	2.44798	11.0153	7.55503	4.32e-11	1.24e-08	UP
SFXN1	0.770194	7.02375	7.5397	4.64e-11	1.3e-08	NOT
LRRC41	0.521208	8.33076	7.53312	4.78e-11	1.32e-08	NOT
RARRES1	2.05314	8.41897	7.52741	4.91e-11	1.32e-08	UP
TAF10	0.901354	9.2685	7.51127	5.28e-11	1.4e-08	NOT
TTI1	0.564549	6.9311	7.48956	5.84e-11	1.5e-08	NOT
PDIA4	0.94678	9.44712	7.48854	5.87e-11	1.5e-08	NOT
RPGRIP1L	1.04906	5.24585	7.48248	6.03e-11	1.52e-08	UP
LMO4	0.657069	9.57221	7.47402	6.27e-11	1.55e-08	NOT
TANC2	1.00882	7.70465	7.45875	6.73e-11	1.63e-08	UP
BET1	0.577369	8.01139	7.44907	7.03e-11	1.66e-08	NOT
CBFB	0.663982	9.27621	7.44824	7.06e-11	1.66e-08	NOT
PCSK1	2.84897	5.60178	7.43147	7.63e-11	1.76e-08	UP
PLXNC1	1.23143	8.2767	7.42455	7.87e-11	1.79e-08	UP
BTBD11	1.96535	6.31717	7.41099	8.38e-11	1.86e-08	UP
SPG21	0.635635	9.82055	7.4063	8.56e-11	1.86e-08	NOT
WDR26	0.627173	9.84024	7.40606	8.57e-11	1.86e-08	NOT
C1R	1.00139	12.4022	7.39481	9.02e-11	1.92e-08	UP
CNOT4	0.581061	7.62349	7.39349	9.08e-11	1.92e-08	NOT
NUP62	0.658833	8.591	7.38695	9.35e-11	1.94e-08	NOT
FAM20C	1.288	9.19021	7.3848	9.45e-11	1.94e-08	UP
CDC42SE1	0.889806	9.5401	7.37667	9.8e-11	1.96e-08	NOT
TMEM144	0.86905	6.43273	7.37655	9.81e-11	1.96e-08	NOT
TMEM138	0.640508	7.85817	7.36945	1.01e-10	1.98e-08	NOT
MPV17	0.787816	8.28383	7.36801	1.02e-10	1.98e-08	NOT
FGF7	1.36094	7.50142	7.36486	1.03e-10	1.99e-08	UP
ZNF655	0.781421	9.36094	7.35682	1.07e-10	2.03e-08	NOT
PCOLCE	1.36189	12.2201	7.34956	1.11e-10	2.03e-08	UP
ARPC4	0.887323	9.52936	7.34605	1.13e-10	2.03e-08	NOT
SLC25A13	0.697365	7.27681	7.345	1.13e-10	2.03e-08	NOT
GNPDA1	0.7221	8.5205	7.34315	1.14e-10	2.03e-08	NOT
MVP	1.12721	9.82329	7.3425	1.15e-10	2.03e-08	UP
RNF111	0.603938	8.12503	7.34118	1.15e-10	2.03e-08	NOT
MINPP1	0.72068	7.26669	7.33773	1.17e-10	2.03e-08	NOT
TOP1	0.598811	8.91502	7.32634	1.23e-10	2.1e-08	NOT
CTSH	1.19977	10.398	7.3259	1.24e-10	2.1e-08	UP
IDUA	1.47408	7.98476	7.31401	1.31e-10	2.19e-08	UP
KCTD6	0.7285	7.50879	7.30706	1.35e-10	2.23e-08	NOT
TM9SF1	0.715606	8.21904	7.29565	1.42e-10	2.3e-08	NOT
CHI3L2	2.49147	9.68433	7.2954	1.42e-10	2.3e-08	UP
SLC10A3	0.948226	7.86785	7.29171	1.45e-10	2.3e-08	NOT
TRNT1	0.757572	7.23738	7.28887	1.47e-10	2.3e-08	NOT
ERGIC3	0.718326	10.0103	7.28878	1.47e-10	2.3e-08	NOT
SLFN12	0.87747	5.60407	7.26014	1.67e-10	2.59e-08	NOT
ZMAT3	0.891968	8.50232	7.24573	1.78e-10	2.74e-08	NOT
KCND3	1.3758	7.57849	7.24151	1.82e-10	2.76e-08	UP
SLC35B4	0.698446	7.85377	7.23846	1.85e-10	2.77e-08	NOT
KIF2A	0.647576	7.34766	7.23599	1.87e-10	2.78e-08	NOT
SSBP3	0.616635	8.27694	7.23322	1.89e-10	2.78e-08	NOT
CHFR	0.692093	8.22583	7.22456	1.97e-10	2.86e-08	NOT
ZNF548	-0.75488	7.43361	-7.21983	2.01e-10	2.86e-08	NOT
SAMSN1	1.69243	7.35833	7.21922	2.01e-10	2.86e-08	UP
BAX	1.54968	7.27888	7.21838	2.02e-10	2.86e-08	UP
SYNJ1	0.743509	7.72093	7.20531	2.15e-10	3.01e-08	NOT
SUSD1	1.11362	6.53132	7.19984	2.2e-10	3.06e-08	UP
ZNF717	0.831397	5.98111	7.19222	2.28e-10	3.13e-08	NOT
ARHGAP22	1.48491	7.31326	7.18229	2.38e-10	3.22e-08	UP
KCNJ15	1.93478	7.06067	7.18217	2.39e-10	3.22e-08	UP
RYR2	1.73024	5.48147	7.17743	2.44e-10	3.26e-08	UP
DDOST	0.646742	10.4836	7.15799	2.66e-10	3.53e-08	NOT
NEU1	0.763245	8.18878	7.14713	2.8e-10	3.68e-08	NOT
STMN2	2.52846	5.50105	7.13719	2.93e-10	3.81e-08	UP
TRABD2B	1.07414	5.5249	7.1084	3.34e-10	4.3e-08	UP
C12orf4	0.712027	7.49001	7.10669	3.36e-10	4.3e-08	NOT
ZZZ3	0.497187	8.26833	7.10503	3.39e-10	4.3e-08	NOT
TRAF3	0.72784	7.77134	7.10187	3.44e-10	4.32e-08	NOT
WIPF2	0.709971	8.51547	7.09578	3.53e-10	4.41e-08	NOT
SGPL1	0.581669	7.89083	7.09249	3.59e-10	4.43e-08	NOT
CEP83	0.843694	6.53827	7.09003	3.63e-10	4.45e-08	NOT
SPG11	0.603894	9.18952	7.08691	3.68e-10	4.46e-08	NOT
ODF2L	0.803059	6.95412	7.08571	3.7e-10	4.46e-08	NOT
CHIC1	0.48304	7.29871	7.07352	3.91e-10	4.67e-08	NOT
ATP9B	0.546927	7.56292	7.06844	4e-10	4.74e-08	NOT
UBE2Q1	0.47415	9.19664	7.05217	4.31e-10	5.01e-08	NOT
MCCC2	0.615666	8.34214	7.05215	4.31e-10	5.01e-08	NOT
MGAT4B	0.734749	9.00972	7.05124	4.33e-10	5.01e-08	NOT
EVL	0.880216	8.71905	7.03763	4.6e-10	5.29e-08	NOT
PIGG	0.597974	8.77571	7.03314	4.7e-10	5.35e-08	NOT
PIP4K2A	0.679348	8.8821	7.02552	4.86e-10	5.5e-08	NOT
TBC1D32	1.2198	5.04924	7.01625	5.07e-10	5.69e-08	UP
OSMR	1.14462	9.82287	7.01091	5.2e-10	5.78e-08	UP
PRR14L	0.507113	8.27479	7.00826	5.26e-10	5.81e-08	NOT
NCOR2	0.871476	10.5543	7.00473	5.34e-10	5.86e-08	NOT
SDC3	1.13103	8.38822	7.00168	5.42e-10	5.9e-08	UP
DGKQ	0.999198	7.51836	6.98405	5.87e-10	6.31e-08	NOT
PTPN23	0.685275	7.98646	6.98346	5.88e-10	6.31e-08	NOT
DCP1B	0.431404	7.19612	6.98177	5.93e-10	6.31e-08	NOT
DPY19L3	0.751492	8.62586	6.9799	5.98e-10	6.32e-08	NOT
CNP	0.540533	8.92432	6.97678	6.07e-10	6.35e-08	NOT
TCIRG1	1.50115	9.62667	6.97562	6.1e-10	6.35e-08	UP
HPS5	0.760319	7.54338	6.96663	6.35e-10	6.54e-08	NOT
SMC4	0.708002	8.2667	6.96603	6.37e-10	6.54e-08	NOT
PRDM2	0.496606	8.61308	6.96274	6.46e-10	6.59e-08	NOT
CSNK1G1	0.60366	6.99359	6.95874	6.58e-10	6.66e-08	NOT
BTRC	0.592074	7.09969	6.94789	6.91e-10	6.95e-08	NOT
RPN2	0.774208	11.0001	6.94448	7.02e-10	6.98e-08	NOT
ST8SIA4	1.38059	7.73799	6.94391	7.04e-10	6.98e-08	UP
POLR1B	-0.847313	7.39783	-6.93911	7.19e-10	7.09e-08	NOT
DALRD3	0.652596	7.98408	6.91933	7.87e-10	7.7e-08	NOT
RPN1	0.587089	9.85922	6.91666	7.96e-10	7.74e-08	NOT
GSS	0.602051	8.25683	6.91118	8.16e-10	7.81e-08	NOT
ATR	0.642221	8.20071	6.91115	8.16e-10	7.81e-08	NOT
PLTP	1.22363	11.5774	6.91014	8.2e-10	7.81e-08	UP
NADSYN1	1.08884	8.07681	6.90602	8.35e-10	7.9e-08	UP
GOLM1	1.37773	9.75365	6.90492	8.4e-10	7.9e-08	UP
ARAP1	0.882619	9.40654	6.90106	8.54e-10	7.99e-08	NOT
ZNF546	0.662301	5.5978	6.89652	8.72e-10	8.1e-08	NOT
EAF1	0.753806	7.68361	6.89354	8.84e-10	8.16e-08	NOT
SPICE1	0.69228	5.82227	6.89147	8.92e-10	8.18e-08	NOT
PFAS	0.774572	7.23602	6.88307	9.27e-10	8.45e-08	NOT
ZNF101	1.12903	6.30937	6.88032	9.38e-10	8.5e-08	UP
SMAD7	0.704141	8.09105	6.87848	9.46e-10	8.52e-08	NOT
SRM	0.882317	8.57301	6.87416	9.65e-10	8.63e-08	NOT
FKBP14	0.927907	8.06195	6.8719	9.75e-10	8.63e-08	NOT
PGLS	0.985699	8.89098	6.87147	9.76e-10	8.63e-08	NOT
CSK	0.988953	8.9747	6.84644	1.09e-09	9.59e-08	NOT
PLXNB2	0.834425	10.2335	6.84489	1.1e-09	9.59e-08	NOT
RALGAPB	0.488376	8.38704	6.8439	1.11e-09	9.59e-08	NOT
MGAT4A	1.1506	8.52381	6.84251	1.11e-09	9.59e-08	UP
PSEN1	0.58223	9.14544	6.8415	1.12e-09	9.59e-08	NOT
FUT11	0.711371	8.1296	6.83933	1.13e-09	9.63e-08	NOT
CEMIP	2.62402	8.05162	6.83289	1.16e-09	9.85e-08	UP
SLC38A9	0.58218	7.08419	6.82886	1.18e-09	9.97e-08	NOT
USP42	0.572409	7.27387	6.81851	1.24e-09	1.04e-07	NOT
DENND2D	1.16461	7.24006	6.80763	1.3e-09	1.08e-07	UP
MCM5	0.842715	7.72609	6.80602	1.31e-09	1.09e-07	NOT
BRAP	0.556911	7.58787	6.79433	1.38e-09	1.14e-07	NOT
GJB6	3.70217	6.1086	6.78747	1.43e-09	1.17e-07	UP
SLX4IP	0.737918	6.66988	6.77604	1.5e-09	1.22e-07	NOT
NID2	1.44496	9.55999	6.77491	1.51e-09	1.22e-07	UP
NSUN3	0.598538	6.77978	6.77351	1.52e-09	1.22e-07	NOT
EIF1AD	0.659118	7.61552	6.75841	1.62e-09	1.3e-07	NOT
FAM20A	1.5219	8.3266	6.75785	1.63e-09	1.3e-07	UP
SCAMP4	0.96904	7.45606	6.75593	1.64e-09	1.3e-07	NOT
GRB2	0.644733	9.93419	6.74785	1.7e-09	1.34e-07	NOT
NLK	0.673398	7.31854	6.73154	1.83e-09	1.44e-07	NOT
SPOCK1	0.990241	9.21954	6.72589	1.88e-09	1.47e-07	NOT
EED	0.650924	7.96329	6.72394	1.9e-09	1.47e-07	NOT
MAN2B1	1.12107	9.94552	6.72298	1.9e-09	1.47e-07	UP
EML4	0.699309	8.25278	6.71999	1.93e-09	1.48e-07	NOT
GMEB1	0.688257	7.04392	6.71064	2.01e-09	1.51e-07	NOT
SRGAP2	-0.95737	7.06527	-6.71062	2.01e-09	1.51e-07	NOT
TMEM39B	0.583691	6.94962	6.71034	2.02e-09	1.51e-07	NOT
C5orf51	0.609085	7.97979	6.70873	2.03e-09	1.51e-07	NOT
ZNF281	0.704368	7.26198	6.70845	2.03e-09	1.51e-07	NOT
MARCKS	0.755392	10.6652	6.70784	2.04e-09	1.51e-07	NOT
SMARCD2	0.624857	9.01121	6.70721	2.04e-09	1.51e-07	NOT
CTSO	0.851967	9.83386	6.70331	2.08e-09	1.53e-07	NOT
ZNF512B	0.894912	7.97165	6.69801	2.13e-09	1.56e-07	NOT
DDX52	0.534306	7.37904	6.69325	2.18e-09	1.59e-07	NOT
ATP6V1A	0.557245	9.60864	6.68933	2.21e-09	1.61e-07	NOT
SRBD1	0.647908	7.00633	6.68749	2.23e-09	1.61e-07	NOT
ANKIB1	0.537478	8.69648	6.68203	2.29e-09	1.64e-07	NOT
G6PC3	0.613966	8.7723	6.67972	2.31e-09	1.65e-07	NOT
FKBP10	1.22726	9.083	6.67776	2.33e-09	1.66e-07	UP
UGGT1	0.613557	9.04986	6.67701	2.34e-09	1.66e-07	NOT
COQ4	0.734663	8.10701	6.66987	2.42e-09	1.7e-07	NOT
IGFBP2	1.77619	7.52228	6.66742	2.44e-09	1.71e-07	UP
NFXL1	0.731745	6.53661	6.66437	2.48e-09	1.73e-07	NOT
RASSF2	0.852658	8.61145	6.66317	2.49e-09	1.73e-07	NOT
MMP19	1.01085	8.30182	6.66051	2.52e-09	1.74e-07	UP
OSBPL3	1.03484	7.69764	6.6567	2.56e-09	1.76e-07	UP
SEL1L	0.535254	9.63694	6.65328	2.6e-09	1.78e-07	NOT
STK4	0.692893	8.50511	6.65057	2.63e-09	1.8e-07	NOT
KIF3A	0.727965	6.80875	6.64751	2.67e-09	1.81e-07	NOT
GALNT1	0.771781	9.82211	6.64239	2.73e-09	1.84e-07	NOT
GTPBP1	0.576714	8.27285	6.64163	2.74e-09	1.84e-07	NOT
TNFRSF1B	0.637714	8.55631	6.64149	2.74e-09	1.84e-07	NOT
TRIP6	0.803049	8.91768	6.63719	2.8e-09	1.86e-07	NOT
SPCS1	0.623003	10.2251	6.63566	2.82e-09	1.87e-07	NOT
PAPOLG	0.625263	7.32972	6.6303	2.88e-09	1.9e-07	NOT
TRIM22	0.694557	9.62509	6.62652	2.93e-09	1.93e-07	NOT
LUC7L2	0.500144	9.11338	6.62457	2.96e-09	1.94e-07	NOT
SLC23A2	0.792879	8.25996	6.62154	3e-09	1.95e-07	NOT
ACVR1B	0.54272	7.68894	6.61903	3.03e-09	1.97e-07	NOT
ZNF580	1.0333	7.69431	6.61549	3.08e-09	1.98e-07	UP
KCNE3	0.885696	7.67388	6.61548	3.08e-09	1.98e-07	NOT
MED16	0.798982	8.17494	6.61119	3.14e-09	2e-07	NOT
AP4S1	0.531809	6.78811	6.61087	3.15e-09	2e-07	NOT
CENPB	0.765554	8.26817	6.6091	3.17e-09	2e-07	NOT
PDIA6	0.690265	10.9599	6.60888	3.17e-09	2e-07	NOT
PLXNA1	0.8618	9.15052	6.60013	3.3e-09	2.07e-07	NOT
SH3YL1	0.63916	8.66292	6.59818	3.33e-09	2.08e-07	NOT
SRGN	0.979765	10.4158	6.5949	3.38e-09	2.1e-07	NOT
SETX	0.503406	8.91075	6.5946	3.38e-09	2.1e-07	NOT
SMARCAD1	0.54693	7.91345	6.59265	3.41e-09	2.1e-07	NOT
ABHD17A	0.812796	9.5467	6.59223	3.42e-09	2.1e-07	NOT
PHACTR4	0.650527	8.56865	6.5897	3.46e-09	2.12e-07	NOT
LRR1	0.706813	6.11182	6.58752	3.49e-09	2.13e-07	NOT
METTL6	0.512284	6.26947	6.58009	3.61e-09	2.19e-07	NOT
RSPO2	1.9431	5.48284	6.57707	3.66e-09	2.21e-07	UP
HS2ST1	0.674235	7.97106	6.57539	3.69e-09	2.22e-07	NOT
TSHZ3	0.679478	7.6055	6.57009	3.77e-09	2.26e-07	NOT
ZNF169	-0.832664	5.33633	-6.56677	3.83e-09	2.29e-07	NOT
USP48	0.515685	9.34405	6.56019	3.94e-09	2.35e-07	NOT
HP	3.09829	6.69531	6.55604	4.02e-09	2.38e-07	UP
LINC01278	0.712974	6.67199	6.55315	4.07e-09	2.4e-07	NOT
KCNT2	0.977184	6.8399	6.54889	4.15e-09	2.44e-07	NOT
ABHD16A	0.682906	8.0254	6.53418	4.43e-09	2.59e-07	NOT
UBE2W	0.623321	7.80307	6.52208	4.67e-09	2.73e-07	NOT
TNFSF13B	1.18396	8.07366	6.52085	4.7e-09	2.73e-07	UP
TTPAL	0.576314	6.96062	6.51133	4.9e-09	2.84e-07	NOT
PRDM1	1.31512	6.14771	6.50917	4.95e-09	2.85e-07	UP
TECPR1	0.793993	8.54911	6.50581	5.02e-09	2.88e-07	NOT
ERGIC1	0.833109	10.2591	6.50398	5.07e-09	2.9e-07	NOT
LITAF	0.581363	10.1854	6.50173	5.12e-09	2.9e-07	NOT
UCP2	0.929849	10.2325	6.50159	5.12e-09	2.9e-07	NOT
PARP8	0.654473	7.53634	6.49144	5.36e-09	3.03e-07	NOT
BET1L	0.562003	8.32576	6.48657	5.47e-09	3.08e-07	NOT
TNC	1.55807	11.9633	6.48269	5.57e-09	3.12e-07	UP
TTC8	0.602917	7.57252	6.48204	5.58e-09	3.12e-07	NOT
MMP1	4.10518	8.51165	6.47857	5.67e-09	3.16e-07	UP
PARP3	0.445514	7.69699	6.47728	5.7e-09	3.16e-07	NOT
DPAGT1	0.633641	7.58512	6.47246	5.83e-09	3.22e-07	NOT
ARHGAP4	1.34248	7.9203	6.46408	6.05e-09	3.33e-07	UP
FAM91A1	0.686229	8.92449	6.45651	6.25e-09	3.43e-07	NOT
SDF4	0.776217	10.5656	6.45585	6.27e-09	3.43e-07	NOT
LCP2	1.11948	7.70078	6.44948	6.45e-09	3.51e-07	UP
RASSF4	0.99505	8.79803	6.44455	6.59e-09	3.57e-07	NOT
KCTD13	0.716313	6.7419	6.4402	6.72e-09	3.63e-07	NOT
NEK6	0.909375	7.60074	6.43277	6.95e-09	3.74e-07	NOT
CDH11	1.32984	9.80104	6.43213	6.97e-09	3.74e-07	UP
ACSL5	0.599147	7.65346	6.42695	7.13e-09	3.81e-07	NOT
MGA	0.589325	7.23613	6.42562	7.17e-09	3.82e-07	NOT
ZMYM2	0.479746	8.92154	6.42131	7.31e-09	3.87e-07	NOT
EXOC7	0.45916	9.22048	6.42033	7.34e-09	3.87e-07	NOT
LRIG2	0.620975	7.9083	6.41987	7.36e-09	3.87e-07	NOT
HYOU1	0.867688	8.78439	6.41529	7.51e-09	3.94e-07	NOT
KATNB1	0.599943	7.59634	6.41033	7.67e-09	4.01e-07	NOT
PLEKHA8	0.748344	6.70026	6.40819	7.75e-09	4.03e-07	NOT
GPATCH2	0.720025	6.55998	6.40268	7.94e-09	4.12e-07	NOT
FCHO2	0.690368	9.21988	6.39996	8.03e-09	4.15e-07	NOT
RNF149	0.719225	8.96487	6.39748	8.12e-09	4.19e-07	NOT
SPNS1	0.883766	8.01517	6.39278	8.29e-09	4.26e-07	NOT
TMEM252	-1.04766	2.75436	-6.39168	8.33e-09	4.26e-07	DOWN
TEP1	0.688162	8.2799	6.38641	8.53e-09	4.35e-07	NOT
SNX10	1.11189	8.23809	6.38572	8.56e-09	4.35e-07	UP
TP53BP1	0.568932	8.44487	6.38323	8.65e-09	4.38e-07	NOT
GIMAP2	0.904175	7.85626	6.37778	8.86e-09	4.47e-07	NOT
TMEM119	1.32755	8.17123	6.3693	9.2e-09	4.63e-07	UP
SLC18B1	0.851339	7.64947	6.36466	9.39e-09	4.7e-07	NOT
CANX	0.458257	11.7787	6.36423	9.41e-09	4.7e-07	NOT
EFEMP2	0.680293	9.96439	6.36331	9.45e-09	4.7e-07	NOT
LNX1	0.904701	8.38941	6.36105	9.54e-09	4.73e-07	NOT
ZNF503	0.962193	9.49096	6.35599	9.76e-09	4.82e-07	NOT
TANGO2	0.630899	8.07777	6.3556	9.77e-09	4.82e-07	NOT
CORO1A	1.60544	7.93057	6.35384	9.85e-09	4.84e-07	UP
SLC22A17	1.0214	7.55551	6.35298	9.89e-09	4.84e-07	UP
FOXC1	1.03473	9.59765	6.35101	9.97e-09	4.86e-07	UP
RNF44	0.635709	8.21696	6.34507	1.02e-08	4.98e-07	NOT
UBA6	0.504055	8.24473	6.34129	1.04e-08	5.04e-07	NOT
FASTKD3	0.555571	6.79764	6.33844	1.05e-08	5.09e-07	NOT
SLC46A3	0.624806	8.05781	6.33527	1.07e-08	5.15e-07	NOT
CACUL1	0.475509	8.86974	6.3275	1.11e-08	5.3e-07	NOT
ACER3	0.64698	8.3539	6.32711	1.11e-08	5.3e-07	NOT
CAPZA1	0.523017	10.4675	6.32447	1.12e-08	5.32e-07	NOT
C14orf119	0.708855	8.93546	6.32417	1.12e-08	5.32e-07	NOT
GTF3C2	0.462139	8.68679	6.32356	1.13e-08	5.32e-07	NOT
ZNF341	1.07158	5.35892	6.32316	1.13e-08	5.32e-07	UP
CDYL2	0.767558	6.33364	6.32195	1.13e-08	5.33e-07	NOT
ILVBL	0.748901	8.13188	6.31917	1.15e-08	5.38e-07	NOT
TGM2	1.73322	7.54121	6.31304	1.18e-08	5.51e-07	UP
RAC2	1.18945	7.77452	6.31015	1.19e-08	5.56e-07	UP
ERLEC1	0.459037	10.1142	6.3049	1.22e-08	5.68e-07	NOT
EYA3	0.492649	7.58728	6.30307	1.23e-08	5.7e-07	NOT
TMEM260	0.660137	7.65246	6.3024	1.24e-08	5.7e-07	NOT
C1S	0.622892	13.144	6.30102	1.24e-08	5.72e-07	NOT
ZBTB7A	0.759786	9.07693	6.29629	1.27e-08	5.82e-07	NOT
PPP1R18	0.787106	9.06351	6.2958	1.27e-08	5.82e-07	NOT
GAS2L1	0.936254	8.768	6.28897	1.31e-08	5.97e-07	NOT
GNPNAT1	0.771641	7.93652	6.28703	1.32e-08	6.01e-07	NOT
LRRC14	0.815754	7.25091	6.28465	1.34e-08	6.04e-07	NOT
PANK2	0.505258	8.85262	6.2843	1.34e-08	6.04e-07	NOT
DLGAP4	-0.686769	9.58334	-6.2782	1.37e-08	6.19e-07	NOT
LLGL1	0.850491	8.73694	6.27225	1.41e-08	6.33e-07	NOT
EIF1B-AS1	-1.06176	5.22819	-6.26926	1.43e-08	6.4e-07	DOWN
CNDP2	0.621547	9.40465	6.2648	1.46e-08	6.5e-07	NOT
YIPF1	0.573836	7.5869	6.26209	1.48e-08	6.56e-07	NOT
CDK2AP2	0.887323	7.51162	6.25954	1.49e-08	6.61e-07	NOT
TFE3	0.572411	9.54885	6.24979	1.56e-08	6.88e-07	NOT
ITGA4	1.37528	6.25871	6.2487	1.56e-08	6.89e-07	UP
GRAMD1A	0.721406	7.68509	6.24476	1.59e-08	6.97e-07	NOT
ASAP1	0.640533	9.34326	6.24474	1.59e-08	6.97e-07	NOT
SMAD6	0.748155	7.77583	6.24226	1.61e-08	7.03e-07	NOT
YIPF3	0.604437	8.86472	6.23499	1.66e-08	7.22e-07	NOT
KDM2A	0.476248	9.70942	6.23479	1.66e-08	7.22e-07	NOT
GSKIP	0.684324	7.86975	6.23382	1.67e-08	7.22e-07	NOT
HEATR3	0.872671	7.11241	6.23355	1.67e-08	7.22e-07	NOT
GALNT2	0.618198	9.70104	6.22916	1.7e-08	7.29e-07	NOT
FTO	0.521229	9.35373	6.22899	1.71e-08	7.29e-07	NOT
VPS9D1	1.03029	7.07199	6.22779	1.72e-08	7.29e-07	UP
DBR1	0.549626	7.51921	6.2274	1.72e-08	7.29e-07	NOT
ENTPD1	0.718627	8.95409	6.2273	1.72e-08	7.29e-07	NOT
EPG5	0.522946	7.79918	6.22725	1.72e-08	7.29e-07	NOT
TMEM129	1.09177	7.91296	6.22562	1.73e-08	7.32e-07	UP
MNDA	1.10842	7.9528	6.22401	1.74e-08	7.35e-07	UP
SMCO4	0.952247	7.46436	6.21981	1.78e-08	7.46e-07	NOT
FKBP11	1.25919	8.96467	6.21518	1.81e-08	7.59e-07	UP
MSX2	1.18884	5.3919	6.2147	1.82e-08	7.59e-07	UP
FBXL15	0.904275	7.49321	6.21214	1.84e-08	7.64e-07	NOT
GNPTAB	0.512229	8.66485	6.21204	1.84e-08	7.64e-07	NOT
MLEC	0.675114	9.52815	6.20758	1.87e-08	7.74e-07	NOT
CKS2	1.40725	5.59513	6.20752	1.87e-08	7.74e-07	UP
NELFB	0.617848	8.54103	6.20689	1.88e-08	7.74e-07	NOT
PDCD2	0.52847	8.0487	6.20567	1.89e-08	7.76e-07	NOT
TYMS	1.18597	6.56489	6.20464	1.9e-08	7.78e-07	UP
SMOC1	1.32308	9.07886	6.19962	1.94e-08	7.93e-07	UP
ORC2	0.548085	7.42128	6.19777	1.96e-08	7.97e-07	NOT
SUZ12	0.542504	8.31076	6.19321	2e-08	8.09e-07	NOT
TBP	0.458464	7.32334	6.19265	2e-08	8.09e-07	NOT
HEXA	0.687739	10.1766	6.19253	2e-08	8.09e-07	NOT
NCKIPSD	0.520418	7.53327	6.19141	2.01e-08	8.1e-07	NOT
MEGF8	0.597836	8.05882	6.19042	2.02e-08	8.12e-07	NOT
RAB29	0.662074	8.66212	6.1897	2.03e-08	8.12e-07	NOT
E2F3	0.649868	7.40891	6.18713	2.05e-08	8.19e-07	NOT
CLIC6	1.11785	7.45942	6.1858	2.06e-08	8.19e-07	UP
TMPO	0.473616	8.09052	6.18562	2.06e-08	8.19e-07	NOT
DOCK10	1.10339	7.17733	6.18524	2.07e-08	8.19e-07	UP
AMACR	-0.677569	6.06277	-6.18014	2.11e-08	8.35e-07	NOT
BTN3A3	0.884021	7.98549	6.17695	2.14e-08	8.45e-07	NOT
RAB2B	0.569089	8.3868	6.17627	2.15e-08	8.45e-07	NOT
ZNRF2	0.832659	6.94386	6.17553	2.16e-08	8.45e-07	NOT
ZNF280C	0.899158	5.13724	6.17439	2.17e-08	8.47e-07	NOT
UPP1	0.939959	7.46565	6.17383	2.17e-08	8.47e-07	NOT
PRKACB	0.572177	9.1831	6.17311	2.18e-08	8.47e-07	NOT
DRAM1	0.730321	8.40405	6.17251	2.18e-08	8.47e-07	NOT
ALG6	0.659006	7.09431	6.17165	2.19e-08	8.48e-07	NOT
SMC2	0.720698	6.65216	6.16991	2.21e-08	8.48e-07	NOT
TNFAIP8	0.728607	8.33873	6.16975	2.21e-08	8.48e-07	NOT
PAICS	0.566788	8.58628	6.1696	2.21e-08	8.48e-07	NOT
S1PR3	1.46911	9.54845	6.16927	2.22e-08	8.48e-07	UP
MARK4	0.666761	7.66725	6.1661	2.25e-08	8.58e-07	NOT
TMEM170A	0.621154	7.48134	6.16483	2.26e-08	8.59e-07	NOT
BRAT1	0.792273	7.94743	6.16455	2.26e-08	8.59e-07	NOT
GON4L	0.449206	8.1867	6.16036	2.3e-08	8.69e-07	NOT
ZNF415	0.77006	6.48325	6.16035	2.3e-08	8.69e-07	NOT
SLC25A44	0.588044	7.98977	6.16014	2.31e-08	8.69e-07	NOT
VDR	1.40916	7.35946	6.15104	2.4e-08	9.02e-07	UP
NPAT	0.597892	7.33052	6.15012	2.41e-08	9.03e-07	NOT
NABP1	1.01486	7.95164	6.14703	2.44e-08	9.13e-07	UP
SAMD9L	0.828745	8.44881	6.14372	2.48e-08	9.24e-07	NOT
SEC16B	0.704929	7.00017	6.14316	2.48e-08	9.24e-07	NOT
ATP13A1	0.68465	8.36647	6.13708	2.55e-08	9.46e-07	NOT
GCA	0.613191	7.48748	6.13669	2.56e-08	9.46e-07	NOT
C8orf82	1.0807	7.56919	6.12851	2.65e-08	9.78e-07	UP
DEF8	0.655237	8.87976	6.12592	2.68e-08	9.84e-07	NOT
GPR88	2.00062	6.1666	6.12576	2.68e-08	9.84e-07	UP
TMEM33	0.514853	8.37468	6.12051	2.74e-08	1e-06	NOT
MR1	0.867552	8.29757	6.11968	2.75e-08	1.01e-06	NOT
QSOX1	0.7996	8.64752	6.11695	2.78e-08	1.02e-06	NOT
GPR155	0.715943	6.6948	6.11569	2.8e-08	1.02e-06	NOT
GSK3A	-0.411479	7.76437	-6.11473	2.81e-08	1.02e-06	NOT
DTX2P1-UPK3BP1-PMS2P11	-0.651433	6.51199	-6.11104	2.86e-08	1.03e-06	NOT
HAUS6	0.492857	7.42682	6.10253	2.97e-08	1.07e-06	NOT
LRP1B	1.64482	6.00754	6.09869	3.02e-08	1.09e-06	UP
STMN3	0.854087	8.62488	6.09753	3.03e-08	1.09e-06	NOT
GALNS	0.852643	8.20732	6.09658	3.04e-08	1.09e-06	NOT
TBC1D20	0.390128	8.50983	6.09625	3.05e-08	1.09e-06	NOT
SETDB2	0.528571	7.02936	6.09306	3.09e-08	1.1e-06	NOT
C2	1.25136	9.88206	6.09267	3.1e-08	1.1e-06	UP
LACC1	0.952512	7.79301	6.08939	3.14e-08	1.11e-06	NOT
GLIS3	1.16793	6.39633	6.08872	3.15e-08	1.11e-06	UP
EMILIN1	1.49789	8.55288	6.08806	3.16e-08	1.12e-06	UP
VEGFC	1.56518	8.53164	6.08458	3.21e-08	1.13e-06	UP
ZKSCAN7	0.869599	6.22412	6.08334	3.22e-08	1.13e-06	NOT
GOLPH3L	0.55189	7.99901	6.07892	3.29e-08	1.15e-06	NOT
SF1	0.471078	10.0889	6.07888	3.29e-08	1.15e-06	NOT
C9orf64	-0.728875	8.73743	-6.07804	3.3e-08	1.15e-06	NOT
VWA5A	0.743862	9.43471	6.07704	3.31e-08	1.15e-06	NOT
KIAA0319L	0.621235	8.1395	6.07502	3.34e-08	1.16e-06	NOT
WDR45	0.635833	9.38786	6.07004	3.42e-08	1.18e-06	NOT
SS18	0.580165	8.49481	6.06306	3.52e-08	1.22e-06	NOT
EFEMP1	0.819516	13.0491	6.06249	3.53e-08	1.22e-06	NOT
TMUB2	0.506554	8.10559	6.06126	3.55e-08	1.22e-06	NOT
PNMA2	1.02866	6.7271	6.06042	3.56e-08	1.22e-06	UP
ERLIN2	0.460433	8.79116	6.05989	3.57e-08	1.22e-06	NOT
SLC35C2	0.669286	8.29354	6.05296	3.68e-08	1.26e-06	NOT
CEP135	0.651695	6.26284	6.04911	3.74e-08	1.27e-06	NOT
HCLS1	1.10091	9.27678	6.04618	3.79e-08	1.28e-06	UP
KHSRP	0.740831	9.38741	6.04602	3.79e-08	1.28e-06	NOT
SAMD9	0.915822	7.29797	6.04587	3.79e-08	1.28e-06	NOT
MAP1S	0.755259	7.62536	6.04498	3.81e-08	1.29e-06	NOT
ERI1	0.567911	6.70876	6.04399	3.82e-08	1.29e-06	NOT
TIMP1	1.42854	12.4978	6.04281	3.84e-08	1.29e-06	UP
TCF3	0.70783	8.56074	6.03764	3.93e-08	1.32e-06	NOT
CXCL16	1.14153	8.87992	6.03387	4e-08	1.33e-06	UP
SRPRB	0.732033	9.02286	6.03367	4e-08	1.33e-06	NOT
STX16	0.543844	9.45535	6.03363	4e-08	1.33e-06	NOT
FBRSL1	1.08435	8.31684	6.03321	4.01e-08	1.33e-06	UP
UBE2G2	0.50184	9.62134	6.02537	4.15e-08	1.37e-06	NOT
PBX3	0.553532	8.41595	6.02518	4.15e-08	1.37e-06	NOT
RBBP4	0.590445	9.01859	6.02501	4.15e-08	1.37e-06	NOT
SLCO2B1	1.27954	10.175	6.02337	4.18e-08	1.38e-06	UP
EP400	0.460311	8.54988	6.02301	4.19e-08	1.38e-06	NOT
MVB12A	0.787917	7.82115	6.02091	4.23e-08	1.39e-06	NOT
TTC39B	0.761298	6.9908	6.01801	4.28e-08	1.4e-06	NOT
VPS8	0.488851	7.72435	6.01658	4.31e-08	1.41e-06	NOT
FAM135A	0.5669	7.52658	6.01414	4.35e-08	1.42e-06	NOT
TPST2	0.687292	8.6495	6.01046	4.42e-08	1.44e-06	NOT
C2orf42	0.465923	6.9101	6.00712	4.49e-08	1.45e-06	NOT
SHISA5	0.700521	9.98597	6.0071	4.49e-08	1.45e-06	NOT
SOAT1	0.679027	8.81696	6.00694	4.49e-08	1.45e-06	NOT
NRP2	0.726466	8.34126	6.0014	4.6e-08	1.48e-06	NOT
TLR1	0.989201	6.68321	6.00018	4.62e-08	1.49e-06	NOT
HDHD2	0.552183	8.24871	5.99492	4.73e-08	1.52e-06	NOT
ATP7A	0.548986	7.30154	5.99421	4.75e-08	1.52e-06	NOT
DUSP7	0.521904	7.96634	5.99188	4.79e-08	1.53e-06	NOT
INVS	0.531364	6.44192	5.99108	4.81e-08	1.53e-06	NOT
GBGT1	1.0119	7.30783	5.9905	4.82e-08	1.53e-06	UP
PLAU	1.21667	9.69159	5.98896	4.86e-08	1.54e-06	UP
RSPRY1	0.523982	8.12355	5.98507	4.94e-08	1.56e-06	NOT
EDEM2	0.90999	7.55864	5.98393	4.96e-08	1.57e-06	NOT
CSRNP2	0.464033	7.9669	5.98338	4.97e-08	1.57e-06	NOT
S100PBP	0.410163	8.1829	5.98052	5.04e-08	1.58e-06	NOT
ZFP90	0.549818	8.11346	5.98007	5.05e-08	1.58e-06	NOT
BTN3A1	0.72249	8.86939	5.97948	5.06e-08	1.58e-06	NOT
POLD4	0.876073	7.94933	5.97845	5.08e-08	1.59e-06	NOT
LYNX1	0.87897	7.7402	5.97734	5.11e-08	1.59e-06	NOT
TET3	0.993622	7.21405	5.96944	5.28e-08	1.64e-06	NOT
ZFYVE26	0.514434	7.9853	5.96929	5.29e-08	1.64e-06	NOT
SKA2	0.610852	8.07833	5.96886	5.3e-08	1.64e-06	NOT
IFT80	0.520214	8.5462	5.96687	5.34e-08	1.65e-06	NOT
CTSZ	1.24697	10.8483	5.96613	5.36e-08	1.65e-06	UP
NTNG1	1.45072	5.73944	5.96226	5.45e-08	1.68e-06	UP
ARL4C	1.24382	8.02036	5.96056	5.49e-08	1.69e-06	UP
NOTCH1	0.784636	8.39504	5.95343	5.66e-08	1.73e-06	NOT
GPR160	0.967799	5.49045	5.95241	5.69e-08	1.74e-06	NOT
BIVM	0.658467	7.95389	5.9518	5.7e-08	1.74e-06	NOT
GM2A	0.695557	9.76902	5.95156	5.71e-08	1.74e-06	NOT
BAZ2B	0.489068	8.51742	5.9508	5.73e-08	1.74e-06	NOT
DCTN5	0.39958	8.16973	5.94828	5.79e-08	1.75e-06	NOT
KDM5B	0.46833	8.26545	5.94677	5.83e-08	1.76e-06	NOT
DNAJC10	0.4758	9.80202	5.94534	5.86e-08	1.77e-06	NOT
PIK3R3	0.853197	7.42084	5.94526	5.86e-08	1.77e-06	NOT
SLC35A2	0.631962	7.43335	5.94416	5.89e-08	1.77e-06	NOT
NEK4	0.667005	7.30619	5.94415	5.89e-08	1.77e-06	NOT
DCP2	0.47057	8.70518	5.94248	5.93e-08	1.78e-06	NOT
SCO2	1.26073	7.81414	5.93951	6.01e-08	1.8e-06	UP
ARSG	0.833547	6.21151	5.93684	6.08e-08	1.81e-06	NOT
ARHGAP9	1.24918	7.54102	5.93669	6.08e-08	1.81e-06	UP
SKP2	0.56581	7.38315	5.93544	6.12e-08	1.82e-06	NOT
RIT1	0.653303	7.71647	5.93366	6.16e-08	1.83e-06	NOT
ZNF542P	0.518093	7.21597	5.93101	6.24e-08	1.84e-06	NOT
STEAP2	1.04784	8.80889	5.93019	6.26e-08	1.84e-06	UP
MIB1	0.657016	8.6723	5.92999	6.26e-08	1.84e-06	NOT
CASP8	0.727236	7.93079	5.92992	6.26e-08	1.84e-06	NOT
ZKSCAN8	0.652893	8.09997	5.92664	6.35e-08	1.86e-06	NOT
CALR	0.734914	11.0954	5.92435	6.42e-08	1.88e-06	NOT
FKTN	0.600012	7.19554	5.92285	6.46e-08	1.89e-06	NOT
JKAMP	0.480519	9.2511	5.92154	6.5e-08	1.89e-06	NOT
GABPB2	0.584208	8.29629	5.91923	6.56e-08	1.91e-06	NOT
LARP4	0.511189	8.36922	5.91393	6.71e-08	1.95e-06	NOT
ARFGEF1	0.379272	8.55183	5.91049	6.81e-08	1.97e-06	NOT
CCDC125	0.634001	5.99327	5.90994	6.83e-08	1.97e-06	NOT
AVL9	0.529893	8.04077	5.90994	6.83e-08	1.97e-06	NOT
CEP152	0.637663	6.38568	5.90488	6.98e-08	2.01e-06	NOT
FNIP2	0.628556	9.54435	5.90458	6.99e-08	2.01e-06	NOT
VAMP7	0.524255	8.88993	5.90389	7.01e-08	2.01e-06	NOT
FAM111A	0.691733	8.64949	5.90029	7.12e-08	2.04e-06	NOT
MBTPS2	0.561763	8.29781	5.89761	7.2e-08	2.06e-06	NOT
ERN1	0.7381	8.02166	5.89565	7.26e-08	2.07e-06	NOT
PRMT3	0.496045	6.87384	5.89532	7.27e-08	2.07e-06	NOT
CBR3-AS1	-0.728164	5.18074	-5.89462	7.29e-08	2.07e-06	NOT
DOCK8	0.831428	7.95375	5.89362	7.32e-08	2.08e-06	NOT
SELL	1.24891	6.78549	5.89185	7.38e-08	2.09e-06	UP
PAK2	0.501005	9.24495	5.88997	7.44e-08	2.1e-06	NOT
EHMT1	0.523329	8.14074	5.88972	7.45e-08	2.1e-06	NOT
VASH1	0.814159	8.27698	5.88487	7.61e-08	2.14e-06	NOT
POGLUT1	0.606702	7.60753	5.88434	7.62e-08	2.14e-06	NOT
PHF21A	0.469079	8.39184	5.88263	7.68e-08	2.15e-06	NOT
PRRT3	0.78993	5.85571	5.88164	7.71e-08	2.16e-06	NOT
GNS	0.512223	10.9434	5.88122	7.73e-08	2.16e-06	NOT
ATMIN	0.471809	8.63437	5.87962	7.78e-08	2.17e-06	NOT
PLA2G15	1.11695	8.13908	5.8783	7.82e-08	2.18e-06	UP
MTA1	0.686643	8.46516	5.87787	7.84e-08	2.18e-06	NOT
TMTC3	0.579533	7.9461	5.87724	7.86e-08	2.18e-06	NOT
STOML1	0.631154	7.48058	5.87675	7.88e-08	2.18e-06	NOT
NCSTN	0.435697	9.20674	5.87326	7.99e-08	2.21e-06	NOT
STK10	0.622384	7.93277	5.87241	8.02e-08	2.21e-06	NOT
WBP1L	0.382119	10.0112	5.87162	8.05e-08	2.22e-06	NOT
CHI3L1	2.69125	10.2181	5.86982	8.11e-08	2.23e-06	UP
TAF1C	0.788712	8.29701	5.86121	8.42e-08	2.31e-06	NOT
HMG20B	0.693832	8.61747	5.8609	8.43e-08	2.31e-06	NOT
POLR2A	0.608335	8.96005	5.8601	8.46e-08	2.31e-06	NOT
IFI44	0.673881	8.55691	5.85774	8.55e-08	2.33e-06	NOT
FNDC3A	0.510403	9.58477	5.85714	8.57e-08	2.33e-06	NOT
PRKCI	0.6342	7.96569	5.85672	8.58e-08	2.33e-06	NOT
CTSC	0.742318	9.85687	5.85513	8.64e-08	2.34e-06	NOT
CTBP1	0.523212	10.1994	5.85392	8.69e-08	2.35e-06	NOT
C19orf54	0.575691	6.94923	5.85277	8.73e-08	2.36e-06	NOT
GABPB1	0.494255	6.99768	5.85064	8.81e-08	2.37e-06	NOT
HPS4	0.525223	7.67288	5.84821	8.9e-08	2.4e-06	NOT
RHNO1	0.567364	6.71433	5.84774	8.92e-08	2.4e-06	NOT
CEP78	0.537174	6.7424	5.84596	8.99e-08	2.41e-06	NOT
ALG13	0.663682	8.64768	5.84363	9.08e-08	2.43e-06	NOT
SPATA6	0.623737	6.51341	5.83914	9.26e-08	2.47e-06	NOT
PIK3R2	0.638207	8.33994	5.83842	9.28e-08	2.47e-06	NOT
MAP3K6	0.816242	8.24063	5.83724	9.33e-08	2.48e-06	NOT
TMF1	0.550772	8.67981	5.83399	9.46e-08	2.51e-06	NOT
RER1	0.477787	10.0453	5.8303	9.61e-08	2.55e-06	NOT
GSPT1	0.517602	9.27369	5.82927	9.66e-08	2.56e-06	NOT
TBCCD1	0.536386	6.72806	5.82868	9.68e-08	2.56e-06	NOT
VKORC1	1.00385	10.5234	5.82698	9.75e-08	2.57e-06	UP
BPNT1	0.604955	7.01135	5.82324	9.91e-08	2.61e-06	NOT
FBXL4	0.497981	6.82853	5.82092	1e-07	2.63e-06	NOT
PTGES	0.955096	7.88582	5.81862	1.01e-07	2.65e-06	NOT
ASCC3	0.610939	7.33714	5.81667	1.02e-07	2.67e-06	NOT
LAIR1	0.988375	9.07887	5.81267	1.04e-07	2.71e-06	NOT
FAM155A	1.61677	5.17874	5.80148	1.09e-07	2.84e-06	UP
UBP1	0.435042	9.28599	5.79867	1.1e-07	2.87e-06	NOT
RHBDD2	0.564262	8.56833	5.79363	1.12e-07	2.92e-06	NOT
GAS2L3	0.949214	6.27182	5.79199	1.13e-07	2.94e-06	NOT
FGFR1OP2	0.473963	8.51554	5.79046	1.14e-07	2.95e-06	NOT
PIK3CD	0.744153	7.53796	5.78648	1.16e-07	3e-06	NOT
WDR6	0.738511	9.16366	5.7834	1.17e-07	3.03e-06	NOT
ZWINT	0.882209	6.06035	5.78064	1.19e-07	3.06e-06	NOT
STEAP1	1.03483	8.08815	5.77884	1.2e-07	3.08e-06	UP
RARA	0.946968	7.95983	5.7782	1.2e-07	3.08e-06	NOT
ABCC10	0.751091	7.54158	5.77662	1.21e-07	3.1e-06	NOT
CCNK	0.478355	8.54481	5.77525	1.22e-07	3.11e-06	NOT
NECAP1	0.558173	7.77551	5.76751	1.26e-07	3.21e-06	NOT
PRR5L	0.916521	7.56578	5.76486	1.27e-07	3.24e-06	NOT
BASP1	0.919937	9.81708	5.76165	1.29e-07	3.28e-06	NOT
HMGXB3	0.404645	7.74656	5.75912	1.3e-07	3.31e-06	NOT
TBC1D31	0.661465	5.58659	5.75826	1.31e-07	3.32e-06	NOT
COLGALT1	0.641787	9.57457	5.75284	1.34e-07	3.39e-06	NOT
MRGBP	0.664184	6.58019	5.75042	1.35e-07	3.42e-06	NOT
SERPINB9	0.870931	7.63938	5.7472	1.37e-07	3.46e-06	NOT
VPS41	0.454964	8.65415	5.74153	1.4e-07	3.54e-06	NOT
IER5L	1.1407	8.7432	5.73947	1.42e-07	3.56e-06	UP
ATP6AP1	0.672759	9.81215	5.73812	1.42e-07	3.58e-06	NOT
DDX60L	0.680783	8.05842	5.7378	1.43e-07	3.58e-06	NOT
PVR	-0.588733	7.20526	-5.73507	1.44e-07	3.61e-06	NOT
PRMT6	0.72889	6.61267	5.73443	1.45e-07	3.61e-06	NOT
SIL1	0.768423	8.54644	5.72708	1.49e-07	3.72e-06	NOT
SLC39A10	0.69627	7.78508	5.72623	1.5e-07	3.73e-06	NOT
LMNB2	0.829997	6.88393	5.72584	1.5e-07	3.73e-06	NOT
DCAF10	0.44488	7.63	5.71889	1.55e-07	3.83e-06	NOT
ST3GAL1	0.594267	8.32641	5.71882	1.55e-07	3.83e-06	NOT
MAPK9	0.448164	8.39018	5.71798	1.55e-07	3.84e-06	NOT
SAE1	0.4785	8.35797	5.71615	1.56e-07	3.86e-06	NOT
RBM47	1.14845	8.21879	5.71352	1.58e-07	3.9e-06	UP
ANGEL2	0.431186	8.56551	5.7098	1.61e-07	3.95e-06	NOT
GATAD2A	0.605098	8.80204	5.70885	1.61e-07	3.96e-06	NOT
IL4R	0.754493	8.42221	5.70444	1.64e-07	4.03e-06	NOT
FZD2	1.46766	6.25796	5.70271	1.66e-07	4.05e-06	UP
DOK3	1.15201	7.49577	5.7005	1.67e-07	4.08e-06	UP
MFSD10	0.875334	7.88182	5.69553	1.71e-07	4.16e-06	NOT
C1RL	0.715649	9.07463	5.69307	1.73e-07	4.2e-06	NOT
PAAF1	0.437664	7.5523	5.69219	1.73e-07	4.21e-06	NOT
ZNF513	1.0722	6.66734	5.69105	1.74e-07	4.22e-06	UP
AP3D1	0.389674	9.68135	5.69079	1.74e-07	4.22e-06	NOT
FES	0.675159	7.52256	5.6878	1.76e-07	4.27e-06	NOT
TMEM259	1.0396	8.93614	5.68187	1.81e-07	4.37e-06	UP
LXN	0.927968	8.22274	5.67778	1.84e-07	4.44e-06	NOT
MAST3	0.764342	7.42937	5.67711	1.85e-07	4.44e-06	NOT
CFB	1.207	9.63832	5.67708	1.85e-07	4.44e-06	UP
ZNF738	0.789187	6.42213	5.67555	1.86e-07	4.45e-06	NOT
BGN	1.43712	11.7581	5.67528	1.86e-07	4.45e-06	UP
HSPH1	0.638999	8.51973	5.67494	1.86e-07	4.45e-06	NOT
TPP1	0.733329	11.0987	5.67469	1.87e-07	4.45e-06	NOT
PIGO	0.635099	7.18767	5.67462	1.87e-07	4.45e-06	NOT
CHPF2	0.83173	8.50592	5.67362	1.87e-07	4.46e-06	NOT
RAB14	0.503574	9.51159	5.67242	1.88e-07	4.47e-06	NOT
NCOA5	0.392675	7.56469	5.6721	1.89e-07	4.47e-06	NOT
TBPL1	0.694908	7.88397	5.67199	1.89e-07	4.47e-06	NOT
B3GALT6	0.807252	7.88888	5.66735	1.92e-07	4.55e-06	NOT
ZNF45	0.467183	6.95108	5.6666	1.93e-07	4.56e-06	NOT
SCRG1	1.86847	8.15083	5.66446	1.95e-07	4.59e-06	UP
IGF1	1.40822	10.0822	5.66333	1.96e-07	4.6e-06	UP
SPATA20	0.622328	8.94388	5.65805	2e-07	4.69e-06	NOT
ZNF627	0.506699	7.03437	5.65796	2e-07	4.69e-06	NOT
C1orf131	0.456834	7.66132	5.65778	2e-07	4.69e-06	NOT
NOC3L	0.50973	7.71309	5.65545	2.02e-07	4.73e-06	NOT
PAG1	0.797877	7.24251	5.65516	2.03e-07	4.73e-06	NOT
SEMA4G	-0.869594	4.78845	-5.65448	2.03e-07	4.73e-06	NOT
SLC38A7	0.67852	7.51108	5.65378	2.04e-07	4.74e-06	NOT
LGALS3BP	0.807846	10.618	5.65258	2.05e-07	4.76e-06	NOT
GAA	0.892946	9.74748	5.64909	2.08e-07	4.82e-06	NOT
ATG4C	0.650761	7.08172	5.64452	2.12e-07	4.91e-06	NOT
ZBED3	0.67323	7.57083	5.64339	2.13e-07	4.92e-06	NOT
ZNF544	0.635183	6.68041	5.64311	2.13e-07	4.92e-06	NOT
GLTP	0.375392	8.90376	5.64056	2.16e-07	4.96e-06	NOT
TBC1D16	0.675129	9.18962	5.64056	2.16e-07	4.96e-06	NOT
CRELD2	0.738497	9.01568	5.63786	2.18e-07	5e-06	NOT
VMA21	0.448965	8.77651	5.63768	2.18e-07	5e-06	NOT
ISG20L2	0.486128	7.76187	5.63073	2.25e-07	5.14e-06	NOT
EMC1	0.46999	8.13976	5.62957	2.26e-07	5.16e-06	NOT
CCRL2	0.910232	5.96748	5.62765	2.28e-07	5.2e-06	NOT
NICN1	0.592901	7.09018	5.62477	2.3e-07	5.25e-06	NOT
KDM2B	0.618603	8.48165	5.62146	2.34e-07	5.31e-06	NOT
CHD3	0.684825	8.66072	5.62127	2.34e-07	5.31e-06	NOT
HLA-DRA	1.16137	12.512	5.62099	2.34e-07	5.31e-06	UP
PIGT	0.548538	10.0147	5.61338	2.42e-07	5.47e-06	NOT
AREL1	0.53468	7.43949	5.6133	2.42e-07	5.47e-06	NOT
SLC30A1	0.618872	9.06517	5.6124	2.43e-07	5.48e-06	NOT
ZNF746	0.489892	7.38625	5.60891	2.46e-07	5.55e-06	NOT
HM13	0.638428	9.20898	5.60625	2.49e-07	5.61e-06	NOT
ZNF614	0.587903	6.33344	5.60067	2.55e-07	5.73e-06	NOT
MEIS1	0.678135	6.71959	5.59976	2.56e-07	5.75e-06	NOT
GALM	0.499661	7.82273	5.59938	2.57e-07	5.75e-06	NOT
IFT122	-0.567555	7.34257	-5.59734	2.59e-07	5.78e-06	NOT
DPP7	0.833321	9.70511	5.59718	2.59e-07	5.78e-06	NOT
DIP2B	0.45503	7.95511	5.59534	2.61e-07	5.81e-06	NOT
PDZD11	0.514631	8.2234	5.59531	2.61e-07	5.81e-06	NOT
LRP12	0.77786	6.83338	5.59511	2.61e-07	5.81e-06	NOT
TNFAIP6	1.67852	9.44912	5.59002	2.67e-07	5.91e-06	UP
NIFK	0.479404	8.23123	5.58979	2.67e-07	5.91e-06	NOT
LRCH3	0.542351	8.4298	5.58932	2.68e-07	5.91e-06	NOT
FMNL3	0.64026	8.07274	5.5893	2.68e-07	5.91e-06	NOT
DGKZ	0.766151	8.29295	5.58885	2.68e-07	5.92e-06	NOT
ORC5	0.471758	7.25435	5.58631	2.71e-07	5.97e-06	NOT
SIX5	1.01527	7.50035	5.5845	2.73e-07	6e-06	UP
RSBN1L	0.518764	7.70847	5.58427	2.73e-07	6e-06	NOT
FOXRED2	0.674081	6.51635	5.58299	2.75e-07	6.03e-06	NOT
KDM7A	0.673145	8.31715	5.58146	2.77e-07	6.06e-06	NOT
AP5M1	0.54205	8.48988	5.58031	2.78e-07	6.08e-06	NOT
TRIP11	0.419145	7.65455	5.57927	2.79e-07	6.09e-06	NOT
KYNU	1.6323	8.03716	5.57854	2.8e-07	6.1e-06	UP
CENPC	0.504011	7.49888	5.57757	2.81e-07	6.12e-06	NOT
APAF1	0.650251	7.26744	5.57669	2.82e-07	6.13e-06	NOT
SH3RF3	0.741981	7.92306	5.57579	2.83e-07	6.15e-06	NOT
SAC3D1	1.16115	6.67337	5.57351	2.86e-07	6.17e-06	UP
RAPGEF6	0.496584	7.71379	5.57349	2.86e-07	6.17e-06	NOT
TNK2	0.823276	8.22284	5.57332	2.86e-07	6.17e-06	NOT
EPB41L3	0.855608	9.79417	5.57328	2.86e-07	6.17e-06	NOT
ZNF318	0.475042	7.48007	5.57319	2.86e-07	6.17e-06	NOT
GPR180	0.571293	6.72181	5.56913	2.91e-07	6.26e-06	NOT
PRRC2A	0.495245	8.95154	5.56892	2.92e-07	6.26e-06	NOT
CENPK	1.13547	4.24033	5.56663	2.94e-07	6.31e-06	UP
MROH1	0.592623	7.89899	5.56536	2.96e-07	6.34e-06	NOT
SMPD1	0.572426	8.25699	5.56467	2.97e-07	6.35e-06	NOT
TYW5	0.49498	6.33572	5.56403	2.98e-07	6.36e-06	NOT
MRC2	0.890849	11.7785	5.56361	2.98e-07	6.36e-06	NOT
ZNF585B	0.598091	6.89011	5.56279	2.99e-07	6.37e-06	NOT
AGAP11	-1.14781	6.15231	-5.55761	3.06e-07	6.5e-06	DOWN
SDSL	1.16361	5.71501	5.55709	3.06e-07	6.51e-06	UP
AKR1A1	0.665656	10.1018	5.55567	3.08e-07	6.54e-06	NOT
UBXN2A	-0.667101	8.91726	-5.55502	3.09e-07	6.54e-06	NOT
ALG8	0.429411	7.8411	5.55485	3.09e-07	6.54e-06	NOT
SLC39A7	0.881099	8.75347	5.55418	3.1e-07	6.55e-06	NOT
TNFRSF1A	0.547529	10.3678	5.55359	3.11e-07	6.55e-06	NOT
SEL1L3	1.16929	7.70671	5.5516	3.14e-07	6.6e-06	UP
HDHD3	0.795996	6.39838	5.5494	3.17e-07	6.65e-06	NOT
MLH3	0.56712	7.57685	5.54903	3.17e-07	6.65e-06	NOT
C1GALT1	1.01686	9.12146	5.54881	3.17e-07	6.65e-06	UP
MPV17L	-0.756279	6.8256	-5.54241	3.26e-07	6.82e-06	NOT
ERLIN1	0.430799	8.94508	5.54106	3.28e-07	6.85e-06	NOT
MCM9	0.611715	6.40547	5.54078	3.28e-07	6.85e-06	NOT
CLCN6	0.453897	7.89838	5.53929	3.3e-07	6.88e-06	NOT
CPSF6	0.456744	8.7104	5.53725	3.33e-07	6.93e-06	NOT
GINM1	0.499466	9.32893	5.53193	3.41e-07	7.08e-06	NOT
WDR81	0.599124	8.57083	5.52854	3.46e-07	7.17e-06	NOT
OSTC	0.655028	9.93228	5.52753	3.47e-07	7.17e-06	NOT
TMED3	0.845606	9.11645	5.52722	3.47e-07	7.17e-06	NOT
POLR2H	0.54341	8.74599	5.52708	3.48e-07	7.17e-06	NOT
INTS5	0.625845	7.44725	5.52703	3.48e-07	7.17e-06	NOT
TRIM14	1.37856	8.22471	5.52651	3.48e-07	7.18e-06	UP
OGFOD3	0.645109	8.52696	5.52586	3.49e-07	7.19e-06	NOT
SIGIRR	1.00705	7.75728	5.52536	3.5e-07	7.19e-06	UP
NIPAL2	0.599166	7.72209	5.52323	3.53e-07	7.25e-06	NOT
PRELID1	0.609822	9.2665	5.51891	3.6e-07	7.37e-06	NOT
APOL1	0.999628	8.46745	5.51709	3.63e-07	7.41e-06	NOT
RNF187	0.664358	9.48588	5.51522	3.65e-07	7.46e-06	NOT
OLFML2B	0.922244	9.70313	5.51509	3.66e-07	7.46e-06	NOT
NISCH	0.595783	10.5644	5.51346	3.68e-07	7.5e-06	NOT
TNFSF15	1.8148	7.36991	5.5111	3.72e-07	7.56e-06	UP
APBB1IP	1.0505	10.1069	5.50918	3.75e-07	7.61e-06	UP
PIEZO1	0.669022	9.8375	5.50727	3.78e-07	7.66e-06	NOT
BTBD7	0.483446	8.48297	5.50639	3.79e-07	7.68e-06	NOT
ETNK1	0.523731	8.3566	5.50491	3.81e-07	7.72e-06	NOT
ZNF697	0.643459	6.38165	5.50198	3.86e-07	7.8e-06	NOT
L3MBTL1	0.860247	6.42209	5.50092	3.88e-07	7.82e-06	NOT
PPP6R2	-0.527706	8.25152	-5.50033	3.89e-07	7.83e-06	NOT
TBC1D9	0.588048	8.61403	5.49935	3.9e-07	7.85e-06	NOT
CTR9	0.410697	8.79221	5.49578	3.96e-07	7.96e-06	NOT
GNB4	0.540078	9.50575	5.49497	3.98e-07	7.97e-06	NOT
SF3A2	1.17737	7.63616	5.49479	3.98e-07	7.97e-06	UP
SEC23IP	0.457218	7.87231	5.49411	3.99e-07	7.98e-06	NOT
ZNF708	0.62111	5.6881	5.48886	4.08e-07	8.15e-06	NOT
ZNF428	1.14201	7.04355	5.48651	4.12e-07	8.22e-06	UP
CEP57	0.438884	8.36673	5.48619	4.13e-07	8.22e-06	NOT
ZNF558	0.459756	7.64545	5.48584	4.13e-07	8.22e-06	NOT
MIS18BP1	0.71409	7.12107	5.48503	4.15e-07	8.24e-06	NOT
TDO2	1.78797	5.35047	5.48193	4.2e-07	8.33e-06	UP
TNFSF11	1.85514	5.03834	5.47757	4.28e-07	8.47e-06	UP
LINC01094	1.46887	6.28295	5.47542	4.32e-07	8.54e-06	UP
ARF3	0.561227	9.95284	5.47168	4.38e-07	8.66e-06	NOT
CANT1	0.558516	8.45429	5.47107	4.39e-07	8.67e-06	NOT
HGS	0.578837	8.85021	5.47016	4.41e-07	8.69e-06	NOT
ZNF654	0.569789	7.35674	5.4695	4.42e-07	8.71e-06	NOT
GLI3	0.760502	9.19389	5.46881	4.44e-07	8.72e-06	NOT
AGFG2	0.716784	6.84696	5.46744	4.46e-07	8.76e-06	NOT
TFEB	0.871254	7.81809	5.45972	4.61e-07	9.03e-06	NOT
SMG7	0.483591	8.18432	5.45949	4.61e-07	9.03e-06	NOT
PTPN2	0.480678	8.35609	5.459	4.62e-07	9.03e-06	NOT
MED23	0.420363	8.29237	5.45743	4.65e-07	9.08e-06	NOT
BRI3	0.593536	10.4719	5.45563	4.69e-07	9.14e-06	NOT
ADAM17	0.71073	8.17621	5.45536	4.69e-07	9.14e-06	NOT
HDAC1	0.474367	8.68482	5.45401	4.72e-07	9.17e-06	NOT
ZNF75D	0.501305	6.86782	5.45345	4.73e-07	9.18e-06	NOT
ZFPM1	0.954649	6.64469	5.45297	4.74e-07	9.19e-06	NOT
ABCC4	0.678684	6.156	5.45024	4.79e-07	9.28e-06	NOT
CASP4	0.63212	8.57543	5.4488	4.82e-07	9.33e-06	NOT
TULP4	0.56473	7.53847	5.44821	4.83e-07	9.34e-06	NOT
SMAP1	0.43345	8.72647	5.44669	4.87e-07	9.38e-06	NOT
LMBR1	0.53677	7.02329	5.44435	4.91e-07	9.46e-06	NOT
CR1	1.59749	5.52234	5.4429	4.94e-07	9.51e-06	UP
TM7SF3	0.454014	8.80635	5.44107	4.98e-07	9.57e-06	NOT
TMEM45A	0.916942	9.10772	5.4383	5.04e-07	9.67e-06	NOT
ZNF326	0.511567	7.8966	5.43692	5.07e-07	9.7e-06	NOT
SCYL3	0.451301	7.32269	5.43684	5.07e-07	9.7e-06	NOT
RGS3	0.736475	8.83243	5.43551	5.1e-07	9.74e-06	NOT
CSPP1	0.448454	7.34752	5.43478	5.11e-07	9.75e-06	NOT
AKIRIN2	0.524482	8.11335	5.43463	5.12e-07	9.75e-06	NOT
NUDT22	0.724375	7.61605	5.43394	5.13e-07	9.75e-06	NOT
PACS2	-0.429894	9.49466	-5.43393	5.13e-07	9.75e-06	NOT
INTS4	0.406111	7.42541	5.43293	5.15e-07	9.78e-06	NOT
ZNF260	0.574849	7.46089	5.43067	5.2e-07	9.86e-06	NOT
NR2F6	0.947042	7.80866	5.42995	5.22e-07	9.88e-06	NOT
B4GALT7	0.560852	7.3826	5.42661	5.29e-07	1e-05	NOT
GJA5	1.02725	6.33437	5.42413	5.34e-07	1.01e-05	UP
PPIF	0.893154	7.38916	5.42397	5.35e-07	1.01e-05	NOT
BCL2L11	0.470705	7.56026	5.42358	5.36e-07	1.01e-05	NOT
TRPV2	0.89524	7.85625	5.42191	5.39e-07	1.01e-05	NOT
ZNF776	0.640001	7.43462	5.42185	5.4e-07	1.01e-05	NOT
SCG2	1.89426	7.73342	5.42108	5.41e-07	1.02e-05	UP
GPX8	0.721652	9.30539	5.41765	5.49e-07	1.03e-05	NOT
SNED1	1.16463	10.9029	5.41725	5.5e-07	1.03e-05	UP
TP53INP1	0.760894	9.07921	5.41595	5.53e-07	1.03e-05	NOT
ECT2	0.827889	5.92778	5.41484	5.55e-07	1.04e-05	NOT
ZMYM4	0.412605	8.53764	5.41394	5.58e-07	1.04e-05	NOT
FBXO22	0.506061	6.92266	5.41354	5.58e-07	1.04e-05	NOT
PCED1A	0.805819	8.20429	5.41344	5.59e-07	1.04e-05	NOT
NLGN4X	1.43635	6.01803	5.41304	5.6e-07	1.04e-05	UP
LMAN2	0.559957	9.14832	5.41223	5.62e-07	1.04e-05	NOT
INTS9	0.435417	6.93376	5.40706	5.74e-07	1.06e-05	NOT
TPK1	0.637961	7.09356	5.40687	5.74e-07	1.06e-05	NOT
SHROOM1	0.850339	7.23755	5.40482	5.79e-07	1.07e-05	NOT
B4GALT6	0.701335	5.81269	5.40067	5.89e-07	1.09e-05	NOT
ZNF777	0.576801	7.07766	5.40023	5.9e-07	1.09e-05	NOT
ARRDC4	0.649422	8.69842	5.39889	5.94e-07	1.09e-05	NOT
LETM1	0.495213	7.42642	5.39832	5.95e-07	1.09e-05	NOT
RNASE6	1.00696	8.18461	5.39417	6.05e-07	1.11e-05	UP
TP53	0.606246	7.38443	5.39365	6.07e-07	1.11e-05	NOT
FHIT	0.701814	5.4109	5.39325	6.08e-07	1.11e-05	NOT
EPYC	2.72359	5.2092	5.3896	6.17e-07	1.13e-05	UP
MAGED1	0.655629	10.6111	5.38952	6.17e-07	1.13e-05	NOT
NAV2	0.688217	7.85004	5.38911	6.18e-07	1.13e-05	NOT
CCL19	2.06498	6.43586	5.38889	6.19e-07	1.13e-05	UP
SPTLC2	0.557734	8.08523	5.38665	6.24e-07	1.14e-05	NOT
SLC46A1	0.591777	7.82149	5.38647	6.25e-07	1.14e-05	NOT
PIKFYVE	0.566648	8.47922	5.38174	6.37e-07	1.16e-05	NOT
ZMIZ2	0.637888	9.60055	5.38093	6.39e-07	1.16e-05	NOT
TMCO6	0.842733	6.25114	5.38028	6.41e-07	1.16e-05	NOT
TMC6	0.870354	7.58383	5.3782	6.47e-07	1.17e-05	NOT
CSF2RB	0.828401	8.51891	5.37512	6.55e-07	1.18e-05	NOT
SIGMAR1	0.513879	8.05622	5.3739	6.58e-07	1.19e-05	NOT
DGCR2	0.467872	8.76243	5.37368	6.59e-07	1.19e-05	NOT
IRAK3	0.584776	8.08059	5.37352	6.59e-07	1.19e-05	NOT
DERL2	0.443501	8.62626	5.37265	6.62e-07	1.19e-05	NOT
GPC6	0.846488	8.91923	5.37169	6.64e-07	1.19e-05	NOT
WDFY3	0.468954	8.92329	5.37161	6.65e-07	1.19e-05	NOT
SLC38A6	0.764333	7.77103	5.37138	6.65e-07	1.19e-05	NOT
NPC1	0.654393	8.02349	5.37066	6.67e-07	1.19e-05	NOT
DNM1	1.00572	9.90687	5.37063	6.67e-07	1.19e-05	UP
CD248	0.896722	10.3642	5.3695	6.7e-07	1.2e-05	NOT
ABL1	0.43807	9.67928	5.36398	6.86e-07	1.22e-05	NOT
TAPBP	0.659065	9.72564	5.36366	6.87e-07	1.22e-05	NOT
FAP	0.974452	9.53025	5.36364	6.87e-07	1.22e-05	NOT
MRI1	0.627045	8.67664	5.36361	6.87e-07	1.22e-05	NOT
CIAO1	0.431701	8.66947	5.36314	6.88e-07	1.22e-05	NOT
PAPOLA	0.350948	9.98131	5.36308	6.89e-07	1.22e-05	NOT
WNT5B	1.03959	7.4302	5.36307	6.89e-07	1.22e-05	UP
NFATC3	0.460828	8.25132	5.36259	6.9e-07	1.22e-05	NOT
COG4	0.551696	8.22839	5.36022	6.97e-07	1.23e-05	NOT
TTC17	0.393597	9.28303	5.35854	7.02e-07	1.24e-05	NOT
PDE1C	0.785784	7.34188	5.35831	7.02e-07	1.24e-05	NOT
TOPBP1	0.410283	7.94035	5.35828	7.02e-07	1.24e-05	NOT
CRLF3	0.604165	7.83826	5.35585	7.09e-07	1.25e-05	NOT
BLNK	1.11604	7.07189	5.35537	7.11e-07	1.25e-05	UP
SLAMF8	1.63079	5.86839	5.35406	7.15e-07	1.25e-05	UP
PRKD2	0.625897	8.33575	5.35341	7.17e-07	1.25e-05	NOT
SHARPIN	0.650371	7.88381	5.35329	7.17e-07	1.25e-05	NOT
MKNK1	0.487338	9.45311	5.35163	7.22e-07	1.26e-05	NOT
HLA-DPB1	1.14604	11.2971	5.35052	7.25e-07	1.26e-05	UP
CSN1S1	3.65683	8.36295	5.35025	7.26e-07	1.26e-05	UP
VPS13B	0.512925	8.70259	5.34932	7.29e-07	1.27e-05	NOT
REL	0.741029	7.08662	5.3484	7.32e-07	1.27e-05	NOT
IFNAR1	0.608137	8.63909	5.34785	7.33e-07	1.27e-05	NOT
C1QB	1.38351	11.5263	5.34713	7.36e-07	1.28e-05	UP
SUFU	0.48155	7.31429	5.34425	7.44e-07	1.29e-05	NOT
CES2	0.49639	8.36078	5.34229	7.5e-07	1.3e-05	NOT
MICB	0.834001	6.47214	5.34153	7.53e-07	1.3e-05	NOT
UBXN2B	0.458293	7.67205	5.3388	7.61e-07	1.31e-05	NOT
LTBR	0.619785	8.77293	5.33759	7.65e-07	1.32e-05	NOT
ADO	0.461765	7.97399	5.33628	7.69e-07	1.32e-05	NOT
PLXND1	0.589567	10.3453	5.33484	7.74e-07	1.33e-05	NOT
MZF1	0.759735	8.57715	5.33447	7.75e-07	1.33e-05	NOT
PRUNE2	0.718858	9.219	5.33425	7.76e-07	1.33e-05	NOT
USP20	0.588062	7.42667	5.33295	7.8e-07	1.34e-05	NOT
IL18R1	1.16453	5.14157	5.33244	7.82e-07	1.34e-05	UP
DDHD1	0.583374	7.85011	5.33232	7.82e-07	1.34e-05	NOT
NME5	0.772891	5.43244	5.33044	7.88e-07	1.35e-05	NOT
FBXO38	0.339689	8.43094	5.32906	7.93e-07	1.35e-05	NOT
RMDN2	0.722307	6.51986	5.32714	7.99e-07	1.36e-05	NOT
DPF2	0.44	8.34288	5.32647	8.01e-07	1.36e-05	NOT
ANKH	1.0044	11.5801	5.32619	8.02e-07	1.36e-05	UP
NBPF20	0.844979	6.61426	5.32475	8.07e-07	1.37e-05	NOT
FGF10	1.35435	8.11814	5.32445	8.08e-07	1.37e-05	UP
AZI2	0.428579	8.18601	5.32185	8.16e-07	1.38e-05	NOT
FAM221A	0.65954	5.91839	5.32148	8.18e-07	1.38e-05	NOT
CXCL1	1.78887	6.51685	5.32067	8.2e-07	1.39e-05	UP
SPATA5L1	0.545205	6.97827	5.3204	8.21e-07	1.39e-05	NOT
COL16A1	1.06138	9.3971	5.31797	8.3e-07	1.4e-05	UP
PPFIA1	0.448518	9.22399	5.31763	8.31e-07	1.4e-05	NOT
SCAMP3	0.460457	8.89939	5.31439	8.42e-07	1.41e-05	NOT
MED8	0.39452	7.94242	5.31433	8.42e-07	1.41e-05	NOT
ROR2	1.24258	6.25805	5.31242	8.49e-07	1.42e-05	UP
DYNC2H1	0.495913	7.58198	5.3079	8.65e-07	1.45e-05	NOT
SOCS4	0.460841	7.94534	5.307	8.68e-07	1.45e-05	NOT
ELAC2	0.462381	8.09918	5.30266	8.84e-07	1.48e-05	NOT
ZNF444	0.658455	7.47032	5.30232	8.85e-07	1.48e-05	NOT
CHST11	0.92828	7.77079	5.30146	8.88e-07	1.48e-05	NOT
CXCR4	1.40968	8.74177	5.2941	9.15e-07	1.53e-05	UP
HGF	0.803784	7.13118	5.29333	9.18e-07	1.53e-05	NOT
CCSAP	0.678643	7.38464	5.2922	9.23e-07	1.53e-05	NOT
NPTX2	1.49216	7.07623	5.29051	9.29e-07	1.54e-05	UP
FAM161B	-0.657602	7.96754	-5.2905	9.29e-07	1.54e-05	NOT
FANCD2	0.840365	5.42121	5.28812	9.38e-07	1.55e-05	NOT
FMO3	1.00901	6.76386	5.28389	9.55e-07	1.58e-05	UP
PROSER1	0.467465	7.58197	5.28361	9.56e-07	1.58e-05	NOT
PMM2	0.607864	7.52486	5.28126	9.65e-07	1.59e-05	NOT
GSDMD	0.917992	8.44318	5.27791	9.78e-07	1.61e-05	NOT
MEN1	0.528469	7.43375	5.27656	9.84e-07	1.62e-05	NOT
VAV2	0.76719	7.72358	5.27578	9.87e-07	1.62e-05	NOT
UTP15	0.459149	6.11091	5.2754	9.89e-07	1.62e-05	NOT
PUS1	0.77528	6.62182	5.27515	9.9e-07	1.62e-05	NOT
WTIP	0.872428	7.30107	5.271	1.01e-06	1.65e-05	NOT
LOXL1-AS1	0.786372	4.96767	5.26889	1.02e-06	1.66e-05	NOT
SP140L	0.553606	7.40004	5.26832	1.02e-06	1.67e-05	NOT
ZNF827	0.607577	7.59048	5.26781	1.02e-06	1.67e-05	NOT
CEBPB	0.748215	11.103	5.26472	1.03e-06	1.69e-05	NOT
METTL2B	0.5205	6.5526	5.2634	1.04e-06	1.69e-05	NOT
TRIM68	0.455125	7.21391	5.26288	1.04e-06	1.69e-05	NOT
SSX2IP	0.608236	6.03374	5.26287	1.04e-06	1.69e-05	NOT
FAM222B	0.473698	7.32105	5.26149	1.05e-06	1.7e-05	NOT
HPSE	1.16895	6.16834	5.261	1.05e-06	1.7e-05	UP
HAUS7	0.822778	7.80291	5.25729	1.06e-06	1.73e-05	NOT
NAGLU	0.655041	8.53707	5.25712	1.07e-06	1.73e-05	NOT
CALCOCO1	-0.491779	9.3498	-5.25651	1.07e-06	1.73e-05	NOT
PTCD2	0.649724	6.61132	5.25505	1.07e-06	1.74e-05	NOT
ZIC1	1.50538	9.41221	5.25396	1.08e-06	1.74e-05	UP
DNAJC5	0.578559	8.59124	5.25381	1.08e-06	1.74e-05	NOT
IKZF1	1.00101	7.50665	5.25347	1.08e-06	1.74e-05	UP
SLC26A2	0.4894	8.23982	5.25332	1.08e-06	1.74e-05	NOT
TFEC	1.32843	7.30697	5.25125	1.09e-06	1.76e-05	UP
FADD	0.65045	7.67074	5.25024	1.1e-06	1.76e-05	NOT
ZMYM1	0.673088	6.45224	5.24985	1.1e-06	1.76e-05	NOT
GMPPA	0.779356	7.99195	5.2481	1.11e-06	1.77e-05	NOT
CARD8	0.711187	8.51864	5.24716	1.11e-06	1.78e-05	NOT
TMEM19	0.542185	8.21556	5.24477	1.12e-06	1.79e-05	NOT
PRDX4	0.692932	10.2321	5.24111	1.14e-06	1.82e-05	NOT
TMEM154	0.851573	5.90088	5.2407	1.14e-06	1.82e-05	NOT
BMP2K	1.19313	8.11361	5.2404	1.14e-06	1.82e-05	UP
HERC4	0.473623	8.52405	5.23939	1.15e-06	1.82e-05	NOT
PTPN9	-0.284994	7.72135	-5.23699	1.16e-06	1.84e-05	NOT
CEP19	0.983924	5.56833	5.23522	1.17e-06	1.85e-05	NOT
EHMT2	0.743326	7.48414	5.23507	1.17e-06	1.85e-05	NOT
SERPINE2	1.11633	7.78007	5.23254	1.18e-06	1.87e-05	UP
TTC9C	0.56075	6.56071	5.2325	1.18e-06	1.87e-05	NOT
NUP43	0.470112	8.52606	5.23039	1.19e-06	1.88e-05	NOT
ATOX1	0.758894	8.23139	5.22929	1.19e-06	1.89e-05	NOT
ERF	0.888697	7.45159	5.22918	1.19e-06	1.89e-05	NOT
HELZ	0.518797	8.27103	5.22833	1.2e-06	1.89e-05	NOT
DCAKD	0.518296	7.30617	5.22557	1.21e-06	1.91e-05	NOT
TBCK	0.521751	8.00363	5.22533	1.21e-06	1.91e-05	NOT
MYO6	0.508224	8.35102	5.22462	1.22e-06	1.91e-05	NOT
U2AF2	0.529739	8.93098	5.22154	1.23e-06	1.94e-05	NOT
RASA1	0.440954	9.56678	5.22047	1.24e-06	1.94e-05	NOT
XYLT2	0.590108	7.39888	5.22026	1.24e-06	1.94e-05	NOT
LRPAP1	0.508847	9.75002	5.21787	1.25e-06	1.96e-05	NOT
PEX3	0.433913	7.38405	5.21578	1.26e-06	1.97e-05	NOT
DNM2	0.78463	8.10313	5.21553	1.26e-06	1.97e-05	NOT
BEND6	1.06757	6.56086	5.21394	1.27e-06	1.98e-05	UP
RNF135	0.632798	9.56115	5.21301	1.28e-06	1.99e-05	NOT
SLC20A1	0.919185	8.92222	5.21112	1.29e-06	2e-05	NOT
GDAP2	-0.699281	6.23572	-5.20886	1.3e-06	2.02e-05	NOT
RRP8	0.458297	6.90644	5.20518	1.32e-06	2.05e-05	NOT
EPSTI1	0.822201	7.28251	5.20408	1.32e-06	2.05e-05	NOT
KCTD5	0.542266	7.47777	5.20347	1.33e-06	2.06e-05	NOT
IFFO1	0.669473	9.3756	5.20253	1.33e-06	2.06e-05	NOT
TPST1	0.579361	8.07646	5.20247	1.33e-06	2.06e-05	NOT
CNOT3	0.57144	6.99512	5.1987	1.35e-06	2.09e-05	NOT
MUS81	0.549033	8.14266	5.19865	1.35e-06	2.09e-05	NOT
IL10RA	0.928132	9.49321	5.19859	1.35e-06	2.09e-05	NOT
LBP	1.99661	6.95663	5.19728	1.36e-06	2.1e-05	UP
IRF7	0.787715	7.63609	5.19712	1.36e-06	2.1e-05	NOT
RUNX3	1.0003	6.40119	5.1968	1.36e-06	2.1e-05	UP
LOXL1	0.921257	8.7703	5.19499	1.37e-06	2.11e-05	NOT
DDX59	-0.495162	7.82922	-5.19086	1.4e-06	2.14e-05	NOT
GNA15	0.997403	7.5393	5.18947	1.41e-06	2.15e-05	NOT
RAD54B	0.987038	4.31112	5.18932	1.41e-06	2.15e-05	NOT
C2CD3	0.38834	7.22047	5.18851	1.41e-06	2.16e-05	NOT
RABGAP1	0.533718	9.10547	5.18811	1.41e-06	2.16e-05	NOT
ERCC4	0.596573	6.27069	5.18784	1.41e-06	2.16e-05	NOT
SH2B3	0.570689	8.99989	5.18718	1.42e-06	2.16e-05	NOT
PPIB	0.754503	11.5241	5.18664	1.42e-06	2.16e-05	NOT
FAM102A	0.618523	7.35786	5.18639	1.42e-06	2.16e-05	NOT
RAB27A	0.669442	7.83233	5.1851	1.43e-06	2.17e-05	NOT
SLC39A9	0.386053	9.04441	5.18361	1.44e-06	2.18e-05	NOT
ANKRD16	0.691659	5.9451	5.18333	1.44e-06	2.18e-05	NOT
TUBG1	0.844808	7.04472	5.18134	1.45e-06	2.2e-05	NOT
FRMD8	0.646966	8.53522	5.17864	1.47e-06	2.22e-05	NOT
ZFP82	0.53843	6.07452	5.17611	1.48e-06	2.24e-05	NOT
ANGPTL4	1.07396	8.86632	5.17479	1.49e-06	2.25e-05	UP
LPXN	0.782311	8.12477	5.1736	1.5e-06	2.26e-05	NOT
COMT	0.600576	9.87374	5.1735	1.5e-06	2.26e-05	NOT
TLR2	1.25384	8.28016	5.17115	1.51e-06	2.28e-05	UP
CCNT1	0.451392	8.11068	5.17038	1.52e-06	2.28e-05	NOT
HTR2A	0.889922	6.97712	5.1684	1.53e-06	2.3e-05	NOT
NOL9	0.376529	7.80504	5.16742	1.54e-06	2.3e-05	NOT
B4GALT4	0.411479	7.47099	5.16726	1.54e-06	2.3e-05	NOT
APOE	1.51371	12.0604	5.16712	1.54e-06	2.3e-05	UP
ACOT7	0.907051	7.53307	5.16612	1.55e-06	2.31e-05	NOT
NAT9	0.639117	7.63804	5.16476	1.55e-06	2.32e-05	NOT
PCED1B	0.932469	6.6029	5.16397	1.56e-06	2.33e-05	NOT
ZBTB46	0.586744	7.07374	5.16388	1.56e-06	2.33e-05	NOT
FAM120B	0.326918	7.82875	5.16188	1.57e-06	2.34e-05	NOT
POLH	0.679416	6.76261	5.16166	1.57e-06	2.34e-05	NOT
CTDSPL2	0.525489	7.86351	5.16045	1.58e-06	2.35e-05	NOT
SNX13	0.523435	8.54163	5.1593	1.59e-06	2.36e-05	NOT
TRMT61B	0.486911	7.40915	5.15914	1.59e-06	2.36e-05	NOT
SLC33A1	0.544665	8.10806	5.15816	1.6e-06	2.37e-05	NOT
PGS1	0.588946	7.51368	5.15752	1.6e-06	2.37e-05	NOT
FOXP4	0.739753	7.77868	5.15712	1.6e-06	2.37e-05	NOT
TNFAIP2	0.909799	10.6248	5.15712	1.6e-06	2.37e-05	NOT
PPOX	0.506697	7.35538	5.15691	1.6e-06	2.37e-05	NOT
PON2	0.53936	8.97975	5.15653	1.61e-06	2.37e-05	NOT
RAD51AP1	0.91236	5.14131	5.15606	1.61e-06	2.37e-05	NOT
NDST1	0.572544	8.13964	5.1558	1.61e-06	2.37e-05	NOT
SPIN4	0.65979	6.32459	5.1556	1.61e-06	2.37e-05	NOT
PANK3	0.476828	8.92432	5.15328	1.63e-06	2.39e-05	NOT
TIMM23	-0.691225	5.61051	-5.15304	1.63e-06	2.39e-05	NOT
RBM45	0.449064	6.84901	5.15207	1.64e-06	2.4e-05	NOT
RALGDS	0.534804	9.41564	5.15107	1.64e-06	2.41e-05	NOT
PBX2	0.547771	8.76151	5.149	1.66e-06	2.42e-05	NOT
ZGPAT	0.839987	7.36167	5.14894	1.66e-06	2.42e-05	NOT
GTF2H1	0.372611	8.67914	5.14688	1.67e-06	2.44e-05	NOT
CLN5	0.43172	8.67492	5.1465	1.67e-06	2.44e-05	NOT
PSMB8-AS1	0.791272	7.41791	5.14412	1.69e-06	2.46e-05	NOT
TMEM147	0.613643	8.99212	5.14353	1.69e-06	2.47e-05	NOT
P4HB	0.583852	11.7059	5.14307	1.7e-06	2.47e-05	NOT
TRIM59	0.8227	4.85294	5.14017	1.72e-06	2.49e-05	NOT
FUT8	0.500388	7.272	5.13848	1.73e-06	2.51e-05	NOT
RNLS	0.593287	6.37085	5.13428	1.76e-06	2.55e-05	NOT
ZNF678	0.679794	5.98788	5.13387	1.76e-06	2.55e-05	NOT
GNPTG	0.467903	8.99282	5.12924	1.8e-06	2.6e-05	NOT
ALG9	0.394641	7.50557	5.12732	1.81e-06	2.62e-05	NOT
AGO3	0.43673	7.56891	5.12387	1.84e-06	2.65e-05	NOT
FBXO4	0.437089	7.06306	5.12361	1.84e-06	2.65e-05	NOT
TP53I13	0.941063	8.11744	5.12102	1.86e-06	2.68e-05	NOT
IGFBP4	0.945217	11.9309	5.12048	1.86e-06	2.68e-05	NOT
RCC2	0.595516	8.87603	5.12032	1.86e-06	2.68e-05	NOT
PEX11B	0.364461	8.19372	5.12007	1.86e-06	2.68e-05	NOT
CPT2	0.375895	7.57694	5.12004	1.86e-06	2.68e-05	NOT
OBSL1	0.555307	8.76201	5.11969	1.87e-06	2.68e-05	NOT
CCDC80	0.786226	12.1283	5.11915	1.87e-06	2.68e-05	NOT
MCPH1	0.400583	6.87792	5.11902	1.87e-06	2.68e-05	NOT
AKAP11	0.53146	9.10762	5.11893	1.87e-06	2.68e-05	NOT
DENND4A	0.506358	7.15373	5.11876	1.87e-06	2.68e-05	NOT
SRSF6	0.427742	10.7629	5.11851	1.88e-06	2.68e-05	NOT
ZNF667	0.614245	6.15143	5.11821	1.88e-06	2.68e-05	NOT
RAP2B	0.748745	9.6152	5.11672	1.89e-06	2.69e-05	NOT
MIB2	0.826902	8.04331	5.11624	1.89e-06	2.69e-05	NOT
LIPA	0.726785	10.7932	5.11462	1.91e-06	2.71e-05	NOT
CLIC3	1.38498	4.51367	5.11263	1.92e-06	2.73e-05	UP
ZSWIM7	0.704024	7.57901	5.11221	1.92e-06	2.73e-05	NOT
TMEM176A	0.971141	9.72841	5.1098	1.94e-06	2.75e-05	NOT
PLOD1	0.626397	9.20933	5.10778	1.96e-06	2.77e-05	NOT
NUS1	0.480999	8.07523	5.1071	1.96e-06	2.77e-05	NOT
RFK	0.484037	7.74411	5.10701	1.97e-06	2.77e-05	NOT
GNB2	0.574824	10.1165	5.10691	1.97e-06	2.77e-05	NOT
TTLL10	-0.964973	3.78608	-5.10676	1.97e-06	2.77e-05	NOT
CP	1.09474	9.65952	5.10513	1.98e-06	2.79e-05	UP
IL15	0.732434	6.81797	5.10448	1.99e-06	2.79e-05	NOT
ZNF598	0.723823	7.26849	5.10428	1.99e-06	2.79e-05	NOT
PLD3	0.809187	10.5044	5.10398	1.99e-06	2.79e-05	NOT
DCAF17	0.599936	6.79954	5.10367	1.99e-06	2.8e-05	NOT
TNFRSF14	0.716988	9.00961	5.10339	1.99e-06	2.8e-05	NOT
RFX3	0.647521	6.90024	5.10297	2e-06	2.8e-05	NOT
PARP4	0.443367	9.30406	5.1023	2e-06	2.8e-05	NOT
ABAT	0.739041	7.16469	5.10086	2.01e-06	2.82e-05	NOT
SORL1	1.20004	8.493	5.09805	2.04e-06	2.85e-05	UP
SUPT7L	0.373015	8.53518	5.09573	2.06e-06	2.87e-05	NOT
PDE4B	0.947519	8.46577	5.09504	2.06e-06	2.88e-05	NOT
ITGB2	1.0733	9.7319	5.09479	2.06e-06	2.88e-05	UP
PTBP3	0.466059	9.42302	5.09423	2.07e-06	2.88e-05	NOT
S100A9	1.53735	8.09516	5.09396	2.07e-06	2.88e-05	UP
TACC3	0.762817	6.18983	5.09053	2.1e-06	2.92e-05	NOT
STAB1	0.917028	10.9651	5.08952	2.11e-06	2.93e-05	NOT
GOLGA3	0.468736	9.31697	5.08746	2.13e-06	2.95e-05	NOT
HLA-DMB	0.983513	10.0126	5.0862	2.14e-06	2.96e-05	NOT
RMND1	0.520754	6.84769	5.08528	2.15e-06	2.97e-05	NOT
EXOSC1	0.481878	7.5679	5.08358	2.16e-06	2.99e-05	NOT
SIN3A	0.392404	8.22888	5.08265	2.17e-06	2.99e-05	NOT
CLCN3	0.466276	9.10207	5.08255	2.17e-06	2.99e-05	NOT
ZNF200	0.451236	6.60208	5.07991	2.19e-06	3.02e-05	NOT
ADPGK	0.444122	9.17182	5.07877	2.2e-06	3.03e-05	NOT
HHAT	0.838373	5.52368	5.07685	2.22e-06	3.05e-05	NOT
VAV1	0.909496	7.17919	5.07672	2.22e-06	3.05e-05	NOT
NXT2	0.62217	7.17337	5.07665	2.22e-06	3.05e-05	NOT
DNAAF2	0.54959	6.29106	5.07643	2.22e-06	3.05e-05	NOT
FCGR1B	1.93215	5.82705	5.07572	2.23e-06	3.06e-05	UP
GCNT2	0.61358	5.71053	5.07477	2.24e-06	3.07e-05	NOT
PARPBP	0.640734	4.20469	5.07209	2.26e-06	3.09e-05	NOT
PHACTR1	0.610126	5.29353	5.07207	2.26e-06	3.09e-05	NOT
YTHDF1	0.331221	9.0668	5.07198	2.26e-06	3.09e-05	NOT
CCDC85B	0.966522	8.21777	5.07087	2.27e-06	3.1e-05	NOT
TFPT	0.834703	6.59307	5.06915	2.29e-06	3.12e-05	NOT
TIMM10B	0.50383	7.87002	5.06695	2.31e-06	3.15e-05	NOT
CARM1	0.530985	8.14401	5.0665	2.31e-06	3.15e-05	NOT
CBFA2T2	0.546611	8.03642	5.06641	2.32e-06	3.15e-05	NOT
ZWILCH	0.469578	7.24015	5.06614	2.32e-06	3.15e-05	NOT
PAQR7	0.658944	6.35766	5.06597	2.32e-06	3.15e-05	NOT
GPR65	1.16058	6.48853	5.06574	2.32e-06	3.15e-05	UP
TAPBPL	0.663145	7.58729	5.06446	2.33e-06	3.16e-05	NOT
TBXA2R	0.726441	6.15703	5.06428	2.34e-06	3.16e-05	NOT
VPS36	0.394246	9.11937	5.06339	2.34e-06	3.17e-05	NOT
ACVR2A	0.483854	7.28805	5.06173	2.36e-06	3.19e-05	NOT
TAOK1	0.446775	9.56876	5.0571	2.4e-06	3.24e-05	NOT
HELLS	0.954654	5.09619	5.05693	2.41e-06	3.24e-05	NOT
POT1	0.418169	7.69736	5.05609	2.41e-06	3.25e-05	NOT
TMEM248	0.447522	9.74325	5.05607	2.41e-06	3.25e-05	NOT
ADAM28	1.36869	5.40259	5.05584	2.42e-06	3.25e-05	UP
FBXO9	0.343595	9.78405	5.05542	2.42e-06	3.25e-05	NOT
ABRACL	0.834066	7.69545	5.05489	2.43e-06	3.25e-05	NOT
SEC23B	0.588902	8.59632	5.05325	2.44e-06	3.27e-05	NOT
SCAP	0.477	8.55915	5.05256	2.45e-06	3.28e-05	NOT
NRROS	0.802924	6.91504	5.05251	2.45e-06	3.28e-05	NOT
BCKDK	0.638968	7.95682	5.0523	2.45e-06	3.28e-05	NOT
NMI	0.610057	8.06114	5.05196	2.45e-06	3.28e-05	NOT
GLIS2	0.88554	8.7371	5.05163	2.46e-06	3.28e-05	NOT
PCDHB2	0.828739	6.51723	5.05104	2.46e-06	3.28e-05	NOT
FAM193A	0.384865	7.9248	5.05057	2.47e-06	3.29e-05	NOT
ZNF320	0.498469	7.1425	5.05015	2.47e-06	3.29e-05	NOT
XPR1	0.475571	7.71489	5.04921	2.48e-06	3.3e-05	NOT
TRMT1L	0.670643	7.47644	5.049	2.48e-06	3.3e-05	NOT
XRCC2	-1.02388	4.4224	-5.04759	2.5e-06	3.31e-05	DOWN
KSR1	0.73365	8.45914	5.04603	2.51e-06	3.33e-05	NOT
NSUN4	0.386288	6.89404	5.04439	2.53e-06	3.35e-05	NOT
THY1	1.35239	10.161	5.04084	2.57e-06	3.4e-05	UP
CDK1	0.976582	5.70333	5.04041	2.57e-06	3.4e-05	NOT
MSRA	0.472077	7.34576	5.04022	2.57e-06	3.4e-05	NOT
ZFYVE16	0.436416	8.62576	5.04015	2.57e-06	3.4e-05	NOT
ERVK13-1	0.730956	6.68762	5.03979	2.58e-06	3.4e-05	NOT
AP1S1	0.663017	7.48547	5.03887	2.59e-06	3.41e-05	NOT
CFI	1.21002	10.7635	5.03646	2.61e-06	3.44e-05	UP
PTGS1	0.951847	8.92447	5.03622	2.61e-06	3.44e-05	NOT
THEM6	0.693139	6.22909	5.03582	2.62e-06	3.44e-05	NOT
SLC39A8	0.856048	7.70098	5.03581	2.62e-06	3.44e-05	NOT
STK17A	0.640613	7.7301	5.0354	2.62e-06	3.44e-05	NOT
INPP4A	0.465183	8.75058	5.0354	2.62e-06	3.44e-05	NOT
NAA60	0.520219	9.03203	5.03437	2.63e-06	3.45e-05	NOT
SUDS3	0.523868	7.93261	5.0343	2.64e-06	3.45e-05	NOT
SMU1	0.386909	8.09804	5.03244	2.65e-06	3.47e-05	NOT
CHD6	0.42096	7.66403	5.02917	2.69e-06	3.51e-05	NOT
CDKN3	1.16534	5.67081	5.02913	2.69e-06	3.51e-05	UP
BTK	0.938767	7.29723	5.02683	2.72e-06	3.54e-05	NOT
AP1G2	0.663796	8.11077	5.02622	2.72e-06	3.54e-05	NOT
SYNGAP1	0.833747	6.87528	5.02468	2.74e-06	3.56e-05	NOT
EDEM1	0.537474	8.38328	5.02425	2.74e-06	3.57e-05	NOT
GID8	0.374718	8.83013	5.02366	2.75e-06	3.57e-05	NOT
LPAR6	0.546274	9.46397	5.02204	2.77e-06	3.59e-05	NOT
MGAT1	0.495951	9.89208	5.02156	2.77e-06	3.6e-05	NOT
GSPT2	0.492032	7.19512	5.02064	2.78e-06	3.6e-05	NOT
IRAK1	0.572943	9.71649	5.02043	2.79e-06	3.6e-05	NOT
VEZF1	-0.444956	9.07995	-5.01855	2.81e-06	3.63e-05	NOT
GNG5	0.502576	10.1457	5.01782	2.82e-06	3.64e-05	NOT
DNAJB9	0.482796	9.27912	5.01636	2.83e-06	3.65e-05	NOT
FIBP	0.535766	8.61602	5.01296	2.87e-06	3.7e-05	NOT
RPRD1B	0.36374	7.71711	5.0128	2.87e-06	3.7e-05	NOT
SPP1	2.13634	8.64607	5.0122	2.88e-06	3.71e-05	UP
NDUFAF7	0.494088	7.15162	5.01181	2.88e-06	3.71e-05	NOT
CTTNBP2NL	0.508263	8.27361	5.01137	2.89e-06	3.71e-05	NOT
STAT6	0.513564	10.5654	5.00977	2.91e-06	3.73e-05	NOT
ASPSCR1	0.69751	6.90703	5.00966	2.91e-06	3.73e-05	NOT
ARHGEF16	-0.823422	4.73276	-5.00924	2.91e-06	3.73e-05	NOT
B4GALT3	0.469532	7.45458	5.00908	2.92e-06	3.73e-05	NOT
XPO5	0.47185	7.5245	5.00878	2.92e-06	3.73e-05	NOT
WDR37	0.576198	7.95091	5.00851	2.92e-06	3.74e-05	NOT
DNAJC3	0.427441	9.47794	5.00621	2.95e-06	3.77e-05	NOT
PIGM	0.388649	7.28601	5.0046	2.97e-06	3.79e-05	NOT
ABHD17C	0.947113	5.90307	5.00453	2.97e-06	3.79e-05	NOT
SNIP1	0.4737	6.91782	5.00376	2.98e-06	3.79e-05	NOT
ASXL1	0.339422	8.7713	5.00333	2.98e-06	3.8e-05	NOT
ICAM2	0.669629	8.71103	5.00301	2.99e-06	3.8e-05	NOT
PPP4R2	0.459187	8.40283	5.00225	3e-06	3.8e-05	NOT
BNC2	0.670517	7.92369	5.00206	3e-06	3.8e-05	NOT
IL18	0.89897	6.8459	5.00197	3e-06	3.8e-05	NOT
ACAP3	0.87475	8.38247	5.0019	3e-06	3.8e-05	NOT
VCAM1	1.41077	11.7276	5.00013	3.02e-06	3.83e-05	UP
CKAP2	0.666298	6.744	4.99954	3.03e-06	3.83e-05	NOT
BRD4	0.530819	9.20442	4.99874	3.04e-06	3.84e-05	NOT
CHN2	0.668407	5.96188	4.99738	3.06e-06	3.86e-05	NOT
RCN3	0.796377	9.82931	4.99717	3.06e-06	3.86e-05	NOT
CNOT6	0.431061	8.03329	4.99714	3.06e-06	3.86e-05	NOT
CDK16	0.490661	8.22954	4.9955	3.08e-06	3.88e-05	NOT
TTC39C	0.813944	6.74254	4.9949	3.09e-06	3.88e-05	NOT
SPON1	1.54065	8.88497	4.99191	3.12e-06	3.93e-05	UP
CISD2	0.484528	7.77958	4.99173	3.13e-06	3.93e-05	NOT
CLPTM1L	0.43281	9.37496	4.99134	3.13e-06	3.93e-05	NOT
MRPS27	0.394177	8.39317	4.99029	3.14e-06	3.94e-05	NOT
ICAM3	0.943184	7.31774	4.99028	3.14e-06	3.94e-05	NOT
VPS45	0.404186	8.41499	4.98998	3.15e-06	3.94e-05	NOT
PDSS2	0.415735	7.18312	4.98807	3.17e-06	3.97e-05	NOT
CADPS2	0.587393	7.96727	4.98703	3.19e-06	3.98e-05	NOT
FAM98A	0.56326	8.6381	4.98531	3.21e-06	4e-05	NOT
GAPT	1.44286	4.55807	4.98517	3.21e-06	4e-05	UP
OGDH	-0.450749	8.65278	-4.98427	3.22e-06	4.01e-05	NOT
CIITA	0.946488	7.95966	4.98393	3.23e-06	4.02e-05	NOT
GMDS	0.707237	7.4028	4.98294	3.24e-06	4.03e-05	NOT
SENP5	0.382761	8.03134	4.98227	3.25e-06	4.04e-05	NOT
AKNA	0.75228	7.30543	4.98199	3.25e-06	4.04e-05	NOT
OPN3	0.659183	7.1446	4.98034	3.27e-06	4.06e-05	NOT
KDM4D	-1.01622	3.67481	-4.97989	3.28e-06	4.06e-05	DOWN
GPCPD1	0.619715	9.05516	4.97966	3.28e-06	4.06e-05	NOT
DUXAP10	0.877271	5.20927	4.97945	3.28e-06	4.06e-05	NOT
ZBTB5	0.385651	7.26455	4.97801	3.3e-06	4.08e-05	NOT
DNAJC15	0.426816	8.66954	4.97697	3.32e-06	4.1e-05	NOT
NOL4L	0.609369	7.45493	4.97515	3.34e-06	4.12e-05	NOT
TNKS	0.435132	8.57906	4.97278	3.37e-06	4.16e-05	NOT
KLLN	-0.978405	3.43021	-4.97191	3.38e-06	4.17e-05	NOT
ZNF764	0.587559	6.29425	4.97071	3.4e-06	4.19e-05	NOT
RNASET2	0.804371	9.93616	4.96881	3.43e-06	4.21e-05	NOT
GRB7	-1.00447	3.87362	-4.96878	3.43e-06	4.21e-05	DOWN
IL18BP	0.751662	6.65625	4.96851	3.43e-06	4.21e-05	NOT
PLA2G2A	1.18864	13.0275	4.96731	3.45e-06	4.23e-05	UP
RPE	0.501783	8.35133	4.96555	3.47e-06	4.26e-05	NOT
ZNF621	0.533725	7.90745	4.96119	3.53e-06	4.33e-05	NOT
PC	0.759431	7.66624	4.95936	3.56e-06	4.36e-05	NOT
PATZ1	0.484685	7.33227	4.95886	3.57e-06	4.36e-05	NOT
MAGT1	0.501825	10.1772	4.95842	3.57e-06	4.37e-05	NOT
SFMBT2	1.04422	7.34203	4.95795	3.58e-06	4.37e-05	UP
TMEM117	0.601472	6.24028	4.95754	3.58e-06	4.37e-05	NOT
IKBKB	0.466042	8.98475	4.95542	3.61e-06	4.41e-05	NOT
CPSF1	-0.697798	6.88026	-4.95417	3.63e-06	4.42e-05	NOT
ZNF383	0.462267	6.29054	4.95412	3.63e-06	4.42e-05	NOT
RFX5	0.433225	8.45532	4.95389	3.64e-06	4.42e-05	NOT
LEPROTL1	0.452104	8.37624	4.95375	3.64e-06	4.42e-05	NOT
GUK1	0.488865	10.5479	4.9534	3.64e-06	4.42e-05	NOT
COL5A2	0.818542	11.6271	4.95334	3.64e-06	4.42e-05	NOT
TOR1AIP2	0.41093	8.63617	4.95202	3.66e-06	4.44e-05	NOT
DEF6	1.03532	6.55366	4.952	3.66e-06	4.44e-05	UP
ZNRF1	0.571808	8.18822	4.95107	3.68e-06	4.45e-05	NOT
IPO8	0.33454	9.07226	4.94964	3.7e-06	4.47e-05	NOT
GZF1	0.400271	7.33658	4.94906	3.71e-06	4.48e-05	NOT
ADAM8	1.17068	5.96135	4.94865	3.71e-06	4.48e-05	UP
B3GNT9	0.597561	7.73874	4.94794	3.72e-06	4.49e-05	NOT
NPL	1.03976	8.78108	4.94771	3.73e-06	4.49e-05	UP
UBE4A	0.451142	9.15815	4.94764	3.73e-06	4.49e-05	NOT
SPATA18	0.801984	6.75582	4.94721	3.74e-06	4.49e-05	NOT
PLEKHA4	0.920329	8.0864	4.94563	3.76e-06	4.52e-05	NOT
XPO6	0.384595	8.86076	4.94525	3.76e-06	4.52e-05	NOT
NIPA2	0.380718	8.83757	4.94523	3.76e-06	4.52e-05	NOT
ABHD3	0.565724	7.77232	4.9447	3.77e-06	4.52e-05	NOT
GGA1	0.583813	9.53448	4.94441	3.78e-06	4.53e-05	NOT
CTSA	0.597738	10.2374	4.94186	3.82e-06	4.57e-05	NOT
STX17	0.346185	7.60997	4.94128	3.82e-06	4.57e-05	NOT
DPP3	0.557345	7.2347	4.94091	3.83e-06	4.58e-05	NOT
MYO5A	0.638645	9.41847	4.94033	3.84e-06	4.58e-05	NOT
CLCN5	0.495727	6.7291	4.93919	3.86e-06	4.6e-05	NOT
ILF3	0.443273	9.70357	4.93718	3.89e-06	4.63e-05	NOT
MCOLN1	0.791038	8.02792	4.9366	3.9e-06	4.64e-05	NOT
TMX3	0.388608	9.12099	4.93624	3.9e-06	4.64e-05	NOT
AP1B1	0.8868	9.26072	4.93532	3.92e-06	4.66e-05	NOT
MICALL2	1.07814	7.36004	4.93466	3.93e-06	4.67e-05	UP
RTCA	0.533497	8.09156	4.93043	3.99e-06	4.74e-05	NOT
MIR100HG	0.709308	8.49212	4.9295	4.01e-06	4.76e-05	NOT
SLC27A1	0.505292	8.38336	4.92835	4.03e-06	4.77e-05	NOT
BTBD10	0.410864	7.78266	4.92795	4.03e-06	4.77e-05	NOT
PNKP	0.61792	7.5671	4.9279	4.03e-06	4.77e-05	NOT
URB1	0.498	6.96568	4.92734	4.04e-06	4.78e-05	NOT
SMPDL3A	0.849914	7.55361	4.92608	4.06e-06	4.8e-05	NOT
EIF4G3	0.493773	8.91006	4.92585	4.07e-06	4.8e-05	NOT
WDR59	0.43444	8.21784	4.92566	4.07e-06	4.8e-05	NOT
TGS1	0.426448	7.43955	4.92465	4.09e-06	4.82e-05	NOT
CLHC1	1.03086	5.27871	4.92144	4.14e-06	4.87e-05	UP
DNAJC14	0.505764	7.72816	4.91944	4.17e-06	4.91e-05	NOT
MTCH1	0.362095	10.744	4.91849	4.19e-06	4.92e-05	NOT
NR1H2	0.753658	8.23355	4.91814	4.19e-06	4.93e-05	NOT
ALDH16A1	0.808772	7.62755	4.91798	4.2e-06	4.93e-05	NOT
JAK3	1.28487	6.79635	4.91523	4.24e-06	4.97e-05	UP
ZFAND2B	0.561497	7.43514	4.9152	4.24e-06	4.97e-05	NOT
DFFB	0.777386	6.08005	4.91519	4.24e-06	4.97e-05	NOT
UTP18	0.419783	8.59326	4.9133	4.27e-06	5e-05	NOT
AGT	1.34091	7.46804	4.91238	4.29e-06	5.02e-05	UP
IPP	0.631851	6.40505	4.91182	4.3e-06	5.02e-05	NOT
IKBKG	0.487784	7.87305	4.91124	4.31e-06	5.03e-05	NOT
EARS2	0.397444	6.80544	4.91108	4.31e-06	5.03e-05	NOT
EFHD2	0.865104	9.59411	4.91104	4.31e-06	5.03e-05	NOT
MAP3K3	0.362116	8.73818	4.91051	4.32e-06	5.03e-05	NOT
PHLDA1	0.97707	8.28938	4.90958	4.34e-06	5.05e-05	NOT
ARPC1B	0.721963	10.797	4.9088	4.35e-06	5.06e-05	NOT
TXNDC12	0.40211	9.37712	4.90635	4.39e-06	5.11e-05	NOT
MARCKSL1	1.05672	7.0419	4.90495	4.42e-06	5.13e-05	UP
DBF4	0.614249	5.77978	4.90413	4.43e-06	5.14e-05	NOT
ATP6V0C	0.417646	10.3893	4.90393	4.44e-06	5.14e-05	NOT
FAM120C	0.481032	6.95015	4.90377	4.44e-06	5.14e-05	NOT
RASGRP1	1.39027	4.20384	4.90362	4.44e-06	5.14e-05	UP
MGAT2	0.659024	8.53311	4.9013	4.48e-06	5.18e-05	NOT
SPTLC3	0.551454	6.17367	4.901	4.49e-06	5.18e-05	NOT
PBXIP1	0.450448	9.82398	4.90099	4.49e-06	5.18e-05	NOT
CDK14	0.744952	8.69203	4.89964	4.51e-06	5.21e-05	NOT
HSPG2	0.674585	11.1025	4.89609	4.58e-06	5.28e-05	NOT
PPP6R1	0.582997	8.17808	4.89568	4.58e-06	5.28e-05	NOT
TNFAIP3	0.643991	7.97578	4.89457	4.61e-06	5.29e-05	NOT
TMEM208	0.622235	8.15645	4.8945	4.61e-06	5.29e-05	NOT
RHBDD1	0.394626	7.13588	4.89448	4.61e-06	5.29e-05	NOT
CDK12	0.466229	7.50464	4.89313	4.63e-06	5.32e-05	NOT
KMT2B	0.491397	7.81003	4.89288	4.64e-06	5.32e-05	NOT
ST3GAL6	0.703885	6.80284	4.89202	4.65e-06	5.33e-05	NOT
PLBD2	0.55255	9.52577	4.89136	4.66e-06	5.34e-05	NOT
SEMA3A	1.30068	7.95002	4.89008	4.69e-06	5.37e-05	UP
KDELR2	0.449764	10.7743	4.88909	4.71e-06	5.38e-05	NOT
TMEM64	0.652609	7.64554	4.88886	4.71e-06	5.38e-05	NOT
PYCARD	0.822159	8.47027	4.88563	4.77e-06	5.45e-05	NOT
LPP-AS2	0.653362	5.02893	4.88286	4.82e-06	5.5e-05	NOT
EZH2	0.800012	5.54268	4.88067	4.87e-06	5.55e-05	NOT
CCNJ	0.568763	5.9152	4.87984	4.88e-06	5.56e-05	NOT
LRP8	1.17131	6.35246	4.87942	4.89e-06	5.57e-05	UP
PHF23	0.624312	7.63122	4.87808	4.92e-06	5.59e-05	NOT
TDP1	0.576819	6.24826	4.87785	4.92e-06	5.59e-05	NOT
DOLK	0.382726	7.07125	4.87671	4.94e-06	5.61e-05	NOT
PTDSS1	0.422054	9.06572	4.87581	4.96e-06	5.62e-05	NOT
GCC2	0.361721	8.56688	4.87568	4.96e-06	5.62e-05	NOT
TPP2	0.506232	8.24476	4.8756	4.96e-06	5.62e-05	NOT
DCUN1D1	0.361397	8.41636	4.87447	4.99e-06	5.64e-05	NOT
ATG101	0.773805	7.50785	4.87442	4.99e-06	5.64e-05	NOT
SLFN11	0.549874	8.6107	4.87227	5.03e-06	5.69e-05	NOT
MIDN	0.691241	8.14416	4.87193	5.04e-06	5.69e-05	NOT
FZD5	0.732086	5.92022	4.87033	5.07e-06	5.72e-05	NOT
RCN1	0.410623	9.93875	4.86972	5.08e-06	5.73e-05	NOT
MED15	0.481165	8.73321	4.86776	5.12e-06	5.77e-05	NOT
HMGCS2	-0.837636	2.29341	-4.86708	5.13e-06	5.78e-05	NOT
DXO	0.604283	7.14994	4.8654	5.17e-06	5.82e-05	NOT
ASS1	0.543605	9.83427	4.86477	5.18e-06	5.83e-05	NOT
BRCA1	0.481638	5.87638	4.86373	5.2e-06	5.85e-05	NOT
ZNF107	0.667193	6.17545	4.86157	5.25e-06	5.89e-05	NOT
MBD1	0.330402	9.09153	4.85917	5.3e-06	5.94e-05	NOT
SH3PXD2B	0.710418	8.71522	4.85904	5.3e-06	5.94e-05	NOT
SPINT2	0.819927	7.15676	4.85719	5.34e-06	5.98e-05	NOT
SLC30A5	0.401956	8.45385	4.85703	5.34e-06	5.98e-05	NOT
BTBD19	0.925986	7.10992	4.85683	5.35e-06	5.98e-05	NOT
PCYOX1L	0.426095	7.05996	4.85467	5.39e-06	6.02e-05	NOT
VSIG10	-0.54525	6.14268	-4.85446	5.4e-06	6.02e-05	NOT
KCTD11	0.628739	7.00082	4.85445	5.4e-06	6.02e-05	NOT
PLEK	0.822476	8.4138	4.85395	5.41e-06	6.03e-05	NOT
TUBG2	0.559117	7.42381	4.85383	5.41e-06	6.03e-05	NOT
RPAP2	0.40163	6.85203	4.85292	5.43e-06	6.04e-05	NOT
PGM2	0.577902	8.22266	4.85217	5.45e-06	6.05e-05	NOT
CCDC88A	0.534128	8.50925	4.85212	5.45e-06	6.05e-05	NOT
TSKU	-0.764191	8.72548	-4.85157	5.46e-06	6.06e-05	NOT
UBXN8	0.565911	6.75516	4.85127	5.47e-06	6.07e-05	NOT
KDM4C	0.38031	7.58058	4.8499	5.5e-06	6.09e-05	NOT
MILR1	0.92265	6.26321	4.84904	5.51e-06	6.11e-05	NOT
NAGK	0.599609	9.51323	4.84848	5.53e-06	6.12e-05	NOT
NBN	0.468781	8.56614	4.84746	5.55e-06	6.14e-05	NOT
RHOG	0.583115	9.07484	4.847	5.56e-06	6.15e-05	NOT
ARMC10	0.415646	8.25092	4.84664	5.57e-06	6.15e-05	NOT
CCDC113	0.575492	5.92677	4.84647	5.57e-06	6.15e-05	NOT
NCLN	0.77917	7.18366	4.84623	5.58e-06	6.15e-05	NOT
SAP30	0.602985	7.36446	4.84571	5.59e-06	6.16e-05	NOT
TRAFD1	0.503118	8.32153	4.8448	5.61e-06	6.18e-05	NOT
YIF1B	0.77607	7.62255	4.8445	5.61e-06	6.18e-05	NOT
PREX1	0.719552	8.93509	4.8423	5.66e-06	6.23e-05	NOT
MAPRE1	0.349376	9.93974	4.84048	5.7e-06	6.27e-05	NOT
TSR1	-0.526735	8.21674	-4.84	5.71e-06	6.28e-05	NOT
CDC7	1.01397	5.50952	4.83942	5.73e-06	6.28e-05	UP
MEPCE	0.491516	8.35379	4.83895	5.74e-06	6.29e-05	NOT
SCARB1	0.507277	8.59956	4.83825	5.75e-06	6.3e-05	NOT
TBCD	0.63845	8.59918	4.83813	5.76e-06	6.3e-05	NOT
CCL18	1.70732	7.99916	4.83725	5.78e-06	6.32e-05	UP
CCDC22	0.652293	7.16967	4.83571	5.81e-06	6.35e-05	NOT
RCBTB1	0.472334	7.77777	4.83453	5.84e-06	6.38e-05	NOT
NMNAT1	0.485374	6.41284	4.83302	5.87e-06	6.41e-05	NOT
AP1G1	0.437024	8.90666	4.83094	5.92e-06	6.46e-05	NOT
CELF6	0.846671	6.27011	4.82982	5.95e-06	6.48e-05	NOT
RFT1	0.440483	6.64838	4.82902	5.97e-06	6.5e-05	NOT
CCDC102A	0.816094	6.51878	4.82893	5.97e-06	6.5e-05	NOT
PDIK1L	0.473369	6.63725	4.82756	6e-06	6.52e-05	NOT
SELP	0.863929	8.60014	4.8275	6e-06	6.52e-05	NOT
PPP2R3C	0.418347	8.35391	4.827	6.02e-06	6.53e-05	NOT
USP10	-0.482727	7.71966	-4.826	6.04e-06	6.55e-05	NOT
LRRN4CL	0.909652	10.2305	4.82496	6.06e-06	6.57e-05	NOT
SLC35E1	-0.640499	9.61669	-4.82451	6.07e-06	6.58e-05	NOT
NCBP1	0.551971	6.69686	4.82376	6.09e-06	6.6e-05	NOT
WTAP	0.370126	10.0261	4.82274	6.12e-06	6.62e-05	NOT
HLA-DOA	1.11908	7.98023	4.81893	6.21e-06	6.71e-05	UP
GPAA1	0.548626	9.45947	4.81727	6.25e-06	6.75e-05	NOT
RAB8A	0.425276	8.46983	4.81587	6.28e-06	6.78e-05	NOT
ASB16	-1.12074	4.48644	-4.81579	6.29e-06	6.78e-05	DOWN
SETDB1	0.408425	7.78342	4.81547	6.29e-06	6.78e-05	NOT
SMOC2	1.01036	9.74461	4.81328	6.35e-06	6.84e-05	UP
SLC39A3	0.799125	7.56319	4.8104	6.42e-06	6.91e-05	NOT
PM20D2	-0.684369	7.59869	-4.80899	6.46e-06	6.94e-05	NOT
IL17RA	0.521622	8.34345	4.8076	6.49e-06	6.98e-05	NOT
CHUK	0.430279	7.53394	4.80666	6.52e-06	7e-05	NOT
SCYL2	0.396013	8.3607	4.80475	6.57e-06	7.04e-05	NOT
GANC	0.54533	6.74957	4.80298	6.61e-06	7.09e-05	NOT
KIF11	0.95294	4.51077	4.80289	6.61e-06	7.09e-05	NOT
ATRX	0.455864	9.25703	4.80255	6.62e-06	7.09e-05	NOT
G2E3	0.407834	6.94763	4.80199	6.64e-06	7.1e-05	NOT
MFSD9	0.581596	6.00635	4.80086	6.67e-06	7.13e-05	NOT
ZNF284	0.684159	5.77979	4.79906	6.71e-06	7.17e-05	NOT
TRIM27	0.428172	8.52691	4.79813	6.74e-06	7.19e-05	NOT
MVK	-0.498198	7.4973	-4.79751	6.76e-06	7.2e-05	NOT
C6orf62	0.416708	10.2747	4.79744	6.76e-06	7.2e-05	NOT
PIGB	0.474203	7.38008	4.79699	6.77e-06	7.21e-05	NOT
ARL5B	0.422067	7.87114	4.79535	6.81e-06	7.25e-05	NOT
TXLNA	0.444476	8.39607	4.79333	6.87e-06	7.3e-05	NOT
SLC15A2	0.85701	5.01401	4.79317	6.87e-06	7.3e-05	NOT
MTX3	0.425215	8.26567	4.79257	6.89e-06	7.32e-05	NOT
FUCA1	0.729915	10.1528	4.78998	6.96e-06	7.38e-05	NOT
ALOX5	1.22321	9.16087	4.78981	6.96e-06	7.38e-05	UP
SIAE	0.512511	7.75652	4.78943	6.97e-06	7.39e-05	NOT
CCDC85C	0.732035	6.28277	4.78918	6.98e-06	7.39e-05	NOT
CDIP1	0.438913	7.76999	4.78865	6.99e-06	7.4e-05	NOT
TAF4B	0.534546	6.11239	4.7886	7e-06	7.4e-05	NOT
ICAM1	0.54214	8.06391	4.78629	7.06e-06	7.46e-05	NOT
TLR3	0.642546	7.58006	4.78541	7.08e-06	7.48e-05	NOT
ATG7	0.516983	8.01542	4.78472	7.1e-06	7.49e-05	NOT
NCKAP1L	0.983177	8.80542	4.78371	7.13e-06	7.52e-05	NOT
TRA2B	0.310919	10.4755	4.78351	7.14e-06	7.52e-05	NOT
DNMT1	0.537086	8.16449	4.78278	7.16e-06	7.54e-05	NOT
UTP20	0.495446	7.25524	4.78223	7.17e-06	7.55e-05	NOT
SF3B3	0.295458	8.65275	4.78153	7.19e-06	7.56e-05	NOT
LYRM4	0.455769	7.98883	4.78058	7.22e-06	7.58e-05	NOT
SLC12A7	0.55446	9.14089	4.77926	7.26e-06	7.62e-05	NOT
ZNF566	0.598274	6.14076	4.77802	7.29e-06	7.65e-05	NOT
CLCC1	0.330128	8.35349	4.77776	7.3e-06	7.65e-05	NOT
ODF2	0.534757	7.15192	4.77504	7.38e-06	7.73e-05	NOT
DOCK2	0.955769	8.31207	4.77452	7.39e-06	7.74e-05	NOT
ADAM11	-0.940594	4.35746	-4.77351	7.42e-06	7.76e-05	NOT
CASP1	0.54738	8.34451	4.76952	7.54e-06	7.88e-05	NOT
FTSJ1	0.415157	7.84594	4.76938	7.54e-06	7.88e-05	NOT
SLC22A4	1.01332	5.70002	4.76718	7.61e-06	7.94e-05	UP
GLYR1	0.385834	8.49402	4.76691	7.62e-06	7.94e-05	NOT
R3HCC1L	0.373122	6.74864	4.76674	7.62e-06	7.94e-05	NOT
HIF1A	0.55484	10.7235	4.76625	7.64e-06	7.95e-05	NOT
PABPC1L	0.997054	6.59903	4.76613	7.64e-06	7.95e-05	NOT
NLN	-0.689105	8.57405	-4.76197	7.77e-06	8.08e-05	NOT
SHQ1	0.367162	7.67309	4.76171	7.77e-06	8.08e-05	NOT
IL10RB	0.430201	8.31965	4.76155	7.78e-06	8.08e-05	NOT
LYL1	0.865288	7.60422	4.76081	7.8e-06	8.09e-05	NOT
PPARD	0.44496	8.38825	4.76078	7.8e-06	8.09e-05	NOT
TRIM52	0.49006	7.57953	4.76058	7.81e-06	8.09e-05	NOT
PITPNA	0.4676	9.31257	4.76044	7.81e-06	8.09e-05	NOT
LMAN1	0.37419	10.3801	4.76023	7.82e-06	8.09e-05	NOT
PADI3	-0.80708	2.25324	-4.7583	7.88e-06	8.15e-05	NOT
SERPINA3	1.39761	8.39955	4.75772	7.9e-06	8.16e-05	UP
OTUB2	-0.896316	3.76658	-4.75743	7.9e-06	8.16e-05	NOT
ST3GAL3	-0.532264	7.65462	-4.75662	7.93e-06	8.18e-05	NOT
LAMP2	0.563713	10.5484	4.75639	7.94e-06	8.18e-05	NOT
IGFLR1	0.91552	6.97642	4.75442	8e-06	8.24e-05	NOT
ZNF112	0.578166	6.072	4.75402	8.01e-06	8.25e-05	NOT
MGME1	0.572914	7.40603	4.75319	8.04e-06	8.27e-05	NOT
FANCI	0.63017	5.79222	4.75316	8.04e-06	8.27e-05	NOT
WDR24	0.595978	6.16354	4.75211	8.07e-06	8.29e-05	NOT
UTP14A	0.326364	7.21157	4.75174	8.08e-06	8.3e-05	NOT
CTSD	0.909297	10.7598	4.75166	8.08e-06	8.3e-05	NOT
MRO	1.38654	5.82122	4.74955	8.15e-06	8.36e-05	UP
IGLV1-44	3.02352	6.24785	4.74907	8.17e-06	8.37e-05	UP
CHID1	0.658823	8.75358	4.7487	8.18e-06	8.38e-05	NOT
SUN1	-0.500557	10.3959	-4.74701	8.23e-06	8.42e-05	NOT
OTULIN	0.39509	7.25308	4.74676	8.24e-06	8.43e-05	NOT
SIDT2	0.507089	10.5298	4.74629	8.26e-06	8.43e-05	NOT
COG6	0.552516	8.378	4.74623	8.26e-06	8.43e-05	NOT
ANPEP	0.845625	9.96438	4.74583	8.27e-06	8.44e-05	NOT
RAB5C	0.571826	9.26872	4.74561	8.28e-06	8.44e-05	NOT
ZNF628	0.700232	5.87865	4.74433	8.32e-06	8.48e-05	NOT
ZNF236	-0.594945	7.07962	-4.74372	8.34e-06	8.49e-05	NOT
PSMG3	0.595485	7.67303	4.74341	8.35e-06	8.49e-05	NOT
CLPX	0.471144	8.01792	4.74328	8.35e-06	8.49e-05	NOT
MID1	0.640176	6.79436	4.74323	8.36e-06	8.49e-05	NOT
WDR4	0.651919	6.06549	4.74226	8.39e-06	8.52e-05	NOT
TPGS1	1.05161	6.78254	4.74203	8.39e-06	8.52e-05	UP
DMXL2	0.841167	8.98399	4.74138	8.42e-06	8.53e-05	NOT
PNP	0.840772	8.04146	4.74061	8.44e-06	8.55e-05	NOT
ELAVL1	0.354987	9.09975	4.73729	8.55e-06	8.65e-05	NOT
CABIN1	0.442332	8.08874	4.73728	8.55e-06	8.65e-05	NOT
ALG2	0.552645	8.65524	4.73664	8.57e-06	8.67e-05	NOT
ETV6	0.458431	7.62045	4.73637	8.58e-06	8.67e-05	NOT
NOA1	0.417619	8.26595	4.73609	8.59e-06	8.68e-05	NOT
COG8	0.368161	7.6174	4.73583	8.6e-06	8.68e-05	NOT
SLC31A1	0.783507	8.1641	4.73469	8.64e-06	8.71e-05	NOT
NAGA	0.529575	8.78175	4.73408	8.66e-06	8.73e-05	NOT
MAD1L1	0.788297	6.91063	4.7338	8.67e-06	8.73e-05	NOT
TM2D2	0.486118	9.45796	4.73289	8.7e-06	8.75e-05	NOT
CBL	0.546903	8.16854	4.73266	8.71e-06	8.76e-05	NOT
CPT1C	0.958386	4.97733	4.73186	8.73e-06	8.78e-05	NOT
NIN	0.372394	8.31506	4.73113	8.76e-06	8.8e-05	NOT
RNF166	0.770897	7.61358	4.73079	8.77e-06	8.8e-05	NOT
YIPF2	0.668872	8.233	4.72925	8.82e-06	8.85e-05	NOT
FCER1G	0.813383	9.49348	4.72896	8.83e-06	8.85e-05	NOT
B3GALNT1	0.618584	7.42292	4.7284	8.85e-06	8.87e-05	NOT
PLEKHB2	0.579411	9.65493	4.72796	8.87e-06	8.88e-05	NOT
PIGN	0.549855	7.10642	4.72662	8.91e-06	8.92e-05	NOT
MNT	0.480897	8.48908	4.72644	8.92e-06	8.92e-05	NOT
RBM43	0.628614	7.45284	4.7255	8.95e-06	8.94e-05	NOT
COCH	-1.13548	6.84072	-4.72388	9.01e-06	8.99e-05	DOWN
ULK2	0.447032	7.40646	4.72311	9.04e-06	9.01e-05	NOT
ZNF611	-0.643367	7.42846	-4.71743	9.24e-06	9.21e-05	NOT
C7	1.28004	9.82275	4.71666	9.27e-06	9.23e-05	UP
RBAK	0.429371	7.80769	4.71564	9.3e-06	9.26e-05	NOT
CDK19	0.477466	8.1107	4.71469	9.34e-06	9.29e-05	NOT
PALD1	0.721877	7.47129	4.71373	9.37e-06	9.32e-05	NOT
LMBRD2	0.514241	8.08149	4.71202	9.44e-06	9.37e-05	NOT
GUF1	0.603434	6.86853	4.71098	9.47e-06	9.41e-05	NOT
TRIB2	0.669445	8.46987	4.71079	9.48e-06	9.41e-05	NOT
CBY1	0.437758	8.11658	4.71027	9.5e-06	9.41e-05	NOT
ARHGAP20	0.898215	7.96652	4.7102	9.5e-06	9.41e-05	NOT
CUL9	0.495537	7.67022	4.70901	9.55e-06	9.45e-05	NOT
EXT2	0.357269	9.34645	4.70622	9.65e-06	9.55e-05	NOT
SLC25A5	0.516875	10.3952	4.70575	9.67e-06	9.56e-05	NOT
NAGPA	0.662388	7.24945	4.70439	9.72e-06	9.6e-05	NOT
MOGS	0.82978	7.84306	4.70439	9.72e-06	9.6e-05	NOT
SCARB2	0.305565	11.195	4.70411	9.73e-06	9.6e-05	NOT
ASB6	0.397853	7.34516	4.70254	9.79e-06	9.65e-05	NOT
ARMCX5	0.480174	6.99187	4.70093	9.85e-06	9.71e-05	NOT
MAN2C1	0.577697	9.20498	4.69946	9.91e-06	9.75e-05	NOT
MS4A4A	0.874976	9.82485	4.6994	9.91e-06	9.75e-05	NOT
VIPAS39	0.274003	7.81415	4.69903	9.93e-06	9.76e-05	NOT
TNFSF13	0.83023	8.87998	4.6988	9.93e-06	9.76e-05	NOT
PGF	-1.08218	8.98453	-4.69869	9.94e-06	9.76e-05	DOWN
CPAMD8	-1.29474	6.32085	-4.69858	9.94e-06	9.76e-05	DOWN
ARID4B	0.331853	9.11902	4.69557	1.01e-05	9.86e-05	NOT
TUBD1	0.590493	6.53683	4.69525	1.01e-05	9.86e-05	NOT
RFX7	0.45018	7.93566	4.69511	1.01e-05	9.86e-05	NOT
ENC1	0.660696	7.19039	4.69505	1.01e-05	9.86e-05	NOT
SEC16A	0.331748	9.22436	4.69397	1.01e-05	9.9e-05	NOT
MBNL3	0.666127	8.41257	4.69316	1.02e-05	9.92e-05	NOT
ENKD1	0.686108	7.02593	4.69169	1.02e-05	9.97e-05	NOT
TADA3	0.528742	8.62979	4.69149	1.02e-05	9.98e-05	NOT
STRIP1	0.280038	8.03767	4.69071	1.03e-05	0.0001	NOT
PTAR1	0.344689	8.81426	4.69052	1.03e-05	0.0001	NOT
TLR7	1.2937	7.9279	4.68726	1.04e-05	0.000101207	UP
CENPN	0.668649	5.70905	4.68611	1.04e-05	0.000101591	NOT
PLRG1	0.304507	8.78948	4.68521	1.05e-05	0.000101879	NOT
LPCAT2	0.579356	8.49897	4.68434	1.05e-05	0.000102153	NOT
CLDN23	0.817254	6.46341	4.68399	1.05e-05	0.000102224	NOT
UBFD1	0.444242	8.28433	4.6824	1.06e-05	0.000102788	NOT
JMJD4	0.678101	6.46233	4.68212	1.06e-05	0.000102832	NOT
PPP1R21	0.387754	8.37857	4.6817	1.06e-05	0.000102908	NOT
ELL	0.578886	6.81225	4.68159	1.06e-05	0.000102908	NOT
ANKRD13D	0.654198	8.10343	4.67948	1.07e-05	0.000103685	NOT
TMEM161B	0.463634	7.28443	4.67842	1.08e-05	0.000104043	NOT
RBM23	0.34136	8.6759	4.67739	1.08e-05	0.000104388	NOT
IL7R	1.53045	5.69128	4.6771	1.08e-05	0.000104438	UP
AGPAT1	0.380335	8.93975	4.67684	1.08e-05	0.000104475	NOT
SPHK2	0.590828	6.80136	4.67635	1.08e-05	0.000104601	NOT
SSH1	0.4224	8.19565	4.67317	1.1e-05	0.000105807	NOT
REEP4	0.623282	7.34714	4.67306	1.1e-05	0.000105807	NOT
MPHOSPH9	0.742727	5.96037	4.67006	1.11e-05	0.000106943	NOT
SEMA6D	0.761445	8.71301	4.66996	1.11e-05	0.000106943	NOT
PRPSAP2	0.350488	7.4846	4.66915	1.11e-05	0.000107207	NOT
PDGFA	0.557058	7.61827	4.66881	1.12e-05	0.000107279	NOT
ARHGAP30	0.9314	8.2063	4.66784	1.12e-05	0.000107613	NOT
RNF138	0.43419	7.82555	4.66703	1.12e-05	0.000107878	NOT
CDK10	0.656356	8.07457	4.66672	1.13e-05	0.000107878	NOT
PGM3	0.492991	8.12241	4.66669	1.13e-05	0.000107878	NOT
COL13A1	1.09477	5.80918	4.66612	1.13e-05	0.000108009	UP
ENTPD7	0.678567	6.16399	4.66604	1.13e-05	0.000108009	NOT
SEC61A1	0.477345	10.1092	4.66261	1.14e-05	0.000109308	NOT
IRF2BP2	-0.491284	10.8644	-4.66261	1.14e-05	0.000109308	NOT
MAPK13	0.901996	6.42224	4.65947	1.16e-05	0.000110573	NOT
DENND1B	0.610908	7.31038	4.65894	1.16e-05	0.000110728	NOT
TLE3	0.529724	8.12152	4.65809	1.16e-05	0.000111021	NOT
NAPRT	0.736215	7.65503	4.65432	1.18e-05	0.000112578	NOT
HLA-A	0.640496	12.7919	4.65393	1.18e-05	0.000112619	NOT
HLA-DMA	0.835353	10.2259	4.65389	1.18e-05	0.000112619	NOT
GTF2H4	0.47751	6.83971	4.65361	1.18e-05	0.000112664	NOT
RELA	0.390126	9.13471	4.65334	1.18e-05	0.000112674	NOT
TM9SF3	0.415317	10.4332	4.65325	1.19e-05	0.000112674	NOT
TENM1	0.653495	7.47115	4.65307	1.19e-05	0.000112681	NOT
TAF1D	0.516596	8.19453	4.65233	1.19e-05	0.00011293	NOT
KPNB1	0.393607	10.2678	4.65191	1.19e-05	0.000113037	NOT
PDLIM4	0.800589	8.81276	4.65152	1.19e-05	0.000113134	NOT
BEX4	0.547158	7.9483	4.65	1.2e-05	0.000113728	NOT
NADK	0.326783	9.32267	4.64905	1.2e-05	0.000114073	NOT
PSMB8	0.620016	8.88094	4.64881	1.21e-05	0.000114105	NOT
INPP5B	0.498823	7.72649	4.64857	1.21e-05	0.000114134	NOT
PRPF4	0.369064	7.65876	4.64841	1.21e-05	0.000114134	NOT
PRAM1	1.04198	4.6254	4.64767	1.21e-05	0.000114388	UP
TTI2	0.462851	6.26216	4.64748	1.21e-05	0.000114398	NOT
TRERF1	0.623533	7.16871	4.64722	1.21e-05	0.000114437	NOT
HLA-E	0.431142	12.5493	4.64663	1.22e-05	0.000114623	NOT
ODF3B	0.791602	7.97533	4.64558	1.22e-05	0.000115016	NOT
AGRN	0.656265	8.35103	4.64478	1.22e-05	0.000115296	NOT
SCPEP1	0.459946	9.68885	4.64374	1.23e-05	0.000115687	NOT
TPT1-AS1	0.557885	7.77584	4.64337	1.23e-05	0.000115733	NOT
MAP3K11	0.520099	8.57794	4.6433	1.23e-05	0.000115733	NOT
COTL1	0.787078	10.0301	4.64242	1.24e-05	0.000116054	NOT
TCFL5	0.410622	7.31834	4.64176	1.24e-05	0.000116274	NOT
PPRC1	0.481203	7.2252	4.64027	1.25e-05	0.000116872	NOT
PBK	1.17373	4.77551	4.63901	1.25e-05	0.000117363	UP
NAP1L3	0.635383	7.64214	4.63758	1.26e-05	0.00011794	NOT
AGAP3	0.436259	8.9642	4.63721	1.26e-05	0.000118034	NOT
SGK1	0.957839	10.3848	4.63618	1.27e-05	0.000118424	NOT
GOLGA5	0.384723	8.93797	4.63571	1.27e-05	0.000118563	NOT
LARP4B	0.331503	8.27841	4.63483	1.27e-05	0.000118891	NOT
SRD5A3	0.439445	7.26412	4.63354	1.28e-05	0.00011941	NOT
RNF145	0.426253	9.74586	4.63107	1.29e-05	0.000120476	NOT
PCTP	0.475233	7.67143	4.62959	1.3e-05	0.000121088	NOT
TSPAN31	0.372417	9.36361	4.6278	1.31e-05	0.000121825	NOT
ZNF571	0.534304	5.66477	4.62755	1.31e-05	0.000121825	NOT
MBD3	0.671503	8.97202	4.62752	1.31e-05	0.000121825	NOT
CD1D	1.04451	4.70398	4.62686	1.31e-05	0.000122055	UP
TMCO3	0.588851	9.751	4.62541	1.32e-05	0.000122662	NOT
TYMP	1.24863	9.14966	4.62471	1.32e-05	0.000122914	UP
HECTD2	0.592279	8.41711	4.62261	1.33e-05	0.000123834	NOT
ZNF18	0.392121	6.65817	4.62026	1.35e-05	0.000124829	NOT
KCNJ3	-1.1145	2.7018	-4.62021	1.35e-05	0.000124829	DOWN
TCF25	0.362151	9.80464	4.61967	1.35e-05	0.000125008	NOT
TRMT13	0.400814	7.4355	4.61794	1.36e-05	0.000125765	NOT
NAT1	0.879406	6.14279	4.61771	1.36e-05	0.000125798	NOT
AFF3	-1.32565	6.85057	-4.61707	1.36e-05	0.000125951	DOWN
ARFGEF2	0.394274	8.47801	4.61706	1.36e-05	0.000125951	NOT
CPSF3	0.310069	7.92956	4.61472	1.38e-05	0.00012701	NOT
TMCO4	0.654368	6.86606	4.61319	1.38e-05	0.00012764	NOT
APEH	0.55457	8.05732	4.61311	1.38e-05	0.00012764	NOT
SLC26A11	0.619622	8.23526	4.61279	1.39e-05	0.000127645	NOT
HHEX	0.625662	7.51399	4.61262	1.39e-05	0.000127645	NOT
AHI1	0.589488	8.91492	4.6126	1.39e-05	0.000127645	NOT
EPOR	-0.728877	7.66819	-4.61225	1.39e-05	0.000127736	NOT
ATP1A1	0.459705	10.1535	4.61161	1.39e-05	0.000127907	NOT
PPM1D	0.497013	7.25615	4.61135	1.39e-05	0.000127907	NOT
PARP14	0.637718	8.29652	4.61129	1.39e-05	0.000127907	NOT
WDR44	0.46273	7.32879	4.61125	1.39e-05	0.000127907	NOT
PRTFDC1	0.636298	6.97756	4.60992	1.4e-05	0.000128486	NOT
PWWP2B	0.596384	7.24837	4.60816	1.41e-05	0.000129275	NOT
SLC2A10	0.618774	8.35425	4.6065	1.42e-05	0.00013002	NOT
IL17RC	-0.51312	7.71125	-4.60492	1.43e-05	0.00013073	NOT
GPSM1	0.75804	8.19815	4.6047	1.43e-05	0.000130759	NOT
NPC2	0.574246	11.7478	4.60414	1.43e-05	0.000130962	NOT
NEK1	0.440116	7.46714	4.60278	1.44e-05	0.000131566	NOT
LINC00663	0.526269	5.81744	4.60256	1.44e-05	0.000131594	NOT
PCDHB5	0.793848	6.16569	4.60197	1.44e-05	0.00013181	NOT
DENND1A	0.418219	7.33303	4.6018	1.45e-05	0.000131813	NOT
S100A11	0.567819	10.8016	4.60104	1.45e-05	0.000132117	NOT
DNALI1	0.59213	7.09873	4.60073	1.45e-05	0.000132193	NOT
FBXW2	0.385789	9.2225	4.59981	1.46e-05	0.000132578	NOT
FUT4	0.502536	7.02951	4.59953	1.46e-05	0.000132581	NOT
FASTKD1	0.557383	7.33321	4.59936	1.46e-05	0.000132581	NOT
ZNF449	0.485529	7.38156	4.59932	1.46e-05	0.000132581	NOT
KIAA0930	0.524565	10.0145	4.59907	1.46e-05	0.000132624	NOT
AGO4	0.392914	8.29463	4.59732	1.47e-05	0.000133428	NOT
TMED10	0.331865	11.3963	4.59717	1.47e-05	0.000133428	NOT
RCAN1	0.750949	9.3139	4.5967	1.47e-05	0.000133558	NOT
SEH1L	0.381478	8.71968	4.5966	1.47e-05	0.000133558	NOT
POLRMT	0.598846	7.7587	4.59625	1.48e-05	0.00013365	NOT
MFN1	0.357136	8.07489	4.59587	1.48e-05	0.000133765	NOT
ISOC2	0.84266	7.60526	4.59565	1.48e-05	0.000133793	NOT
PCDHB14	0.634937	6.9935	4.59499	1.48e-05	0.000133973	NOT
MON1B	0.328303	8.95403	4.59495	1.48e-05	0.000133973	NOT
LAGE3	0.775879	7.1487	4.59482	1.48e-05	0.000133973	NOT
PPARGC1B	0.796939	6.26711	4.59407	1.49e-05	0.000134279	NOT
M6PR	0.542925	8.88797	4.59317	1.49e-05	0.00013466	NOT
MS4A7	0.893573	10.0176	4.59284	1.5e-05	0.000134746	NOT
ACP2	0.664391	8.73342	4.59266	1.5e-05	0.000134757	NOT
GREM1	1.66944	4.42284	4.59233	1.5e-05	0.000134845	UP
FKBP15	0.499797	9.18403	4.59139	1.5e-05	0.000135246	NOT
ERGIC2	0.408285	8.7029	4.59099	1.51e-05	0.000135372	NOT
ZNF121	0.467276	8.108	4.58954	1.52e-05	0.000136043	NOT
FERMT3	0.987357	8.09994	4.58911	1.52e-05	0.000136183	NOT
CARD16	0.886147	6.56428	4.58836	1.52e-05	0.000136493	NOT
SMARCC1	0.389406	8.44261	4.58763	1.53e-05	0.000136791	NOT
ZNF207	0.27637	10.012	4.58681	1.53e-05	0.000137139	NOT
TEX261	0.301303	9.27445	4.5861	1.54e-05	0.00013743	NOT
LIG3	0.365388	7.03572	4.58441	1.55e-05	0.000138236	NOT
MDM1	0.484146	6.84704	4.58299	1.55e-05	0.000138908	NOT
MBOAT7	0.536967	7.67905	4.58222	1.56e-05	0.000139236	NOT
TRAPPC5	0.622528	8.44961	4.58054	1.57e-05	0.000140049	NOT
CEP76	0.436707	5.89366	4.57892	1.58e-05	0.000140833	NOT
SMIM7	0.383077	9.22993	4.5779	1.58e-05	0.000141299	NOT
CD86	0.9419	7.39139	4.57651	1.59e-05	0.000141969	NOT
FAM81A	-0.884246	3.55584	-4.57505	1.6e-05	0.000142677	NOT
TOR1A	0.335275	8.12158	4.57466	1.6e-05	0.000142802	NOT
ZDHHC5	0.260893	8.98387	4.57326	1.61e-05	0.000143484	NOT
BAZ1B	0.426211	8.6263	4.57287	1.62e-05	0.000143611	NOT
ZNF317	0.352254	7.58699	4.57124	1.63e-05	0.000144425	NOT
ZNF35	0.433079	5.67183	4.57059	1.63e-05	0.000144697	NOT
PTPRJ	0.850575	8.02295	4.57015	1.63e-05	0.000144853	NOT
MYO1F	0.96411	8.44567	4.56922	1.64e-05	0.000145244	NOT
C1orf162	1.03835	8.1904	4.56913	1.64e-05	0.000145244	UP
POLD3	0.417207	7.07277	4.56836	1.64e-05	0.000145582	NOT
DCUN1D5	0.461732	7.81563	4.5673	1.65e-05	0.000146084	NOT
STEAP4	0.805521	11.8481	4.5665	1.66e-05	0.000146446	NOT
DOK4	0.596054	7.38483	4.56584	1.66e-05	0.000146726	NOT
NDUFAF1	0.513028	7.58714	4.56443	1.67e-05	0.00014737	NOT
HBB	1.63971	9.02061	4.56438	1.67e-05	0.00014737	UP
CXCL10	1.57397	5.39258	4.56327	1.68e-05	0.000147885	UP
RANBP3	0.442018	7.90861	4.56315	1.68e-05	0.000147885	NOT
CMTM6	0.533509	9.80988	4.5623	1.68e-05	0.000148281	NOT
MTFMT	0.64278	6.26147	4.56201	1.68e-05	0.000148281	NOT
USP46	0.531346	7.26917	4.56198	1.68e-05	0.000148281	NOT
NPR3	1.12104	7.25835	4.56107	1.69e-05	0.000148706	UP
PDE1A	0.748389	8.65914	4.55959	1.7e-05	0.000149462	NOT
GTF3C4	0.413694	7.50292	4.55939	1.7e-05	0.000149485	NOT
NCOR1	0.395269	8.61091	4.55883	1.7e-05	0.000149633	NOT
SLC39A6	0.477091	9.86652	4.55882	1.7e-05	0.000149633	NOT
LRFN3	0.625559	6.03208	4.5585	1.71e-05	0.000149723	NOT
EHBP1L1	0.967289	9.06975	4.55835	1.71e-05	0.000149723	NOT
HAVCR2	1.13063	8.54499	4.55648	1.72e-05	0.000150707	UP
ZNF202	0.352348	6.62005	4.55435	1.73e-05	0.000151813	NOT
IGHMBP2	-0.382784	7.36361	-4.55425	1.73e-05	0.000151813	NOT
FCGRT	0.703962	11.0528	4.55406	1.74e-05	0.000151832	NOT
CMBL	-0.659013	9.51185	-4.55386	1.74e-05	0.000151861	NOT
TSPAN14	0.440536	8.73432	4.55112	1.76e-05	0.000153362	NOT
TRA2A	0.464227	8.69951	4.54985	1.76e-05	0.000154016	NOT
AKAP6	-1.12192	4.5034	-4.54884	1.77e-05	0.000154521	DOWN
COL6A2	0.810384	12.7725	4.54791	1.78e-05	0.00015498	NOT
BTN2A2	0.688861	7.39529	4.54697	1.78e-05	0.000155442	NOT
CCDC142	0.735861	5.46383	4.54667	1.79e-05	0.00015553	NOT
HPRT1	0.454342	7.99807	4.54605	1.79e-05	0.000155802	NOT
MMP3	2.68665	11.086	4.54564	1.79e-05	0.000155955	UP
TARBP1	0.443146	7.92476	4.54466	1.8e-05	0.000156361	NOT
HSPBAP1	0.525947	7.56805	4.54464	1.8e-05	0.000156361	NOT
NDC80	0.945846	5.03734	4.54449	1.8e-05	0.000156361	NOT
ZBED8	0.591151	6.1685	4.54356	1.81e-05	0.000156825	NOT
ZNF700	0.46893	7.39319	4.54164	1.82e-05	0.00015785	NOT
GALNT7	0.785903	8.24984	4.54154	1.82e-05	0.00015785	NOT
STT3A	0.457401	8.84324	4.54131	1.82e-05	0.000157894	NOT
RSPO3	0.901192	8.7895	4.5401	1.83e-05	0.000158534	NOT
TXNDC15	0.362581	9.72692	4.5392	1.84e-05	0.000158983	NOT
MED22	0.520616	7.38229	4.53901	1.84e-05	0.000158993	NOT
RHBDF2	0.759331	7.54499	4.53887	1.84e-05	0.000158993	NOT
ERMP1	0.442561	7.24973	4.53853	1.84e-05	0.000159108	NOT
ARHGDIB	0.495578	10.6323	4.53699	1.85e-05	0.000159951	NOT
TMEM219	0.491403	9.17755	4.53656	1.86e-05	0.000160054	NOT
XPNPEP3	0.387728	7.36138	4.53651	1.86e-05	0.000160054	NOT
RC3H1	0.473792	8.77301	4.53579	1.86e-05	0.000160402	NOT
PDXK	0.477198	9.32887	4.53439	1.87e-05	0.000161162	NOT
COQ2	0.660652	6.85974	4.53335	1.88e-05	0.00016171	NOT
KIAA2013	0.430741	8.82398	4.53218	1.89e-05	0.000162267	NOT
CASD1	0.518588	7.70884	4.53198	1.89e-05	0.000162267	NOT
RUNX2	0.820264	6.45656	4.53187	1.89e-05	0.000162267	NOT
PGBD1	0.622038	5.69097	4.53183	1.89e-05	0.000162267	NOT
METTL8	0.342916	6.82768	4.53057	1.9e-05	0.00016295	NOT
PIGX	0.409331	6.85204	4.53024	1.9e-05	0.000163063	NOT
HPS3	0.41524	8.33284	4.52983	1.9e-05	0.000163219	NOT
TFDP1	0.429818	8.95858	4.52801	1.92e-05	0.000164244	NOT
LIMK1	0.681067	7.084	4.52765	1.92e-05	0.000164244	NOT
ZNF599	0.43381	6.26737	4.52745	1.92e-05	0.000164244	NOT
BCL6	-0.593403	10.5803	-4.52743	1.92e-05	0.000164244	NOT
NINJ1	0.610569	9.02146	4.52742	1.92e-05	0.000164244	NOT
THEM4	0.502469	7.40445	4.5258	1.93e-05	0.000165166	NOT
PPP1R3E	0.486188	6.86621	4.52516	1.94e-05	0.000165429	NOT
EXTL2	0.456617	8.06346	4.52498	1.94e-05	0.000165429	NOT
FCGR2A	0.864142	9.20358	4.52492	1.94e-05	0.000165429	NOT
ORAI3	0.695875	8.67992	4.52196	1.96e-05	0.000167209	NOT
CYBA	1.07757	10.2543	4.52119	1.97e-05	0.00016751	UP
KCTD2	0.294392	8.24231	4.52118	1.97e-05	0.00016751	NOT
BCAN	-0.951173	4.27773	-4.52046	1.97e-05	0.000167871	NOT
CCNB1	0.695338	5.18981	4.52023	1.97e-05	0.000167884	NOT
ZNF780A	0.520504	5.823	4.52013	1.98e-05	0.000167884	NOT
SMARCA4	0.361405	8.86455	4.5184	1.99e-05	0.000168896	NOT
SLC15A3	0.842807	8.61967	4.51778	1.99e-05	0.000169136	NOT
SLC43A2	1.13744	8.42153	4.51772	1.99e-05	0.000169136	UP
UBE3B	0.32984	8.0261	4.5172	2e-05	0.000169372	NOT
NT5DC2	0.877534	7.34068	4.51607	2.01e-05	0.000170007	NOT
CUX1	0.564508	9.93927	4.51504	2.01e-05	0.000170577	NOT
EMC7	0.36086	9.54399	4.51418	2.02e-05	0.000171004	NOT
OSBPL5	0.504572	8.14036	4.51402	2.02e-05	0.000171004	NOT
FGF18	0.963915	7.00919	4.51392	2.02e-05	0.000171004	NOT
MRS2	0.483886	7.53585	4.51377	2.02e-05	0.000171005	NOT
CNOT11	0.349053	7.72776	4.51247	2.03e-05	0.000171731	NOT
ELOVL3	0.922623	4.6176	4.51235	2.04e-05	0.000171731	NOT
WDR20	0.344227	7.25721	4.51218	2.04e-05	0.000171739	NOT
MAK16	0.338534	7.53538	4.51094	2.05e-05	0.000172453	NOT
C1orf216	0.479734	8.00846	4.51053	2.05e-05	0.000172545	NOT
ZNF396	-0.589882	5.20683	-4.5105	2.05e-05	0.000172545	NOT
RPIA	0.455796	7.55302	4.51009	2.05e-05	0.000172714	NOT
ZNF197	0.375911	6.2954	4.50969	2.06e-05	0.000172878	NOT
DCHS2	-1.16869	2.68319	-4.50941	2.06e-05	0.000172962	DOWN
APPBP2	0.390031	8.60341	4.50866	2.06e-05	0.000173357	NOT
HLA-F-AS1	-0.811454	6.12964	-4.50755	2.07e-05	0.000173991	NOT
ZNF691	0.518534	6.56082	4.5071	2.08e-05	0.000174155	NOT
CERS6	0.438275	7.69449	4.507	2.08e-05	0.000174155	NOT
PARP9	0.544613	8.42818	4.50656	2.08e-05	0.000174346	NOT
PARP12	0.589033	8.45883	4.50614	2.08e-05	0.000174521	NOT
MTRF1	0.519519	6.19343	4.50513	2.09e-05	0.00017509	NOT
POP5	0.392273	7.98454	4.50196	2.12e-05	0.000177115	NOT
CYLD	0.419752	8.41557	4.50153	2.12e-05	0.000177222	NOT
CCDC137	0.489221	6.63745	4.5015	2.12e-05	0.000177222	NOT
BLOC1S3	0.439603	6.76876	4.50101	2.12e-05	0.000177449	NOT
SEC31A	0.381236	10.937	4.50014	2.13e-05	0.000177931	NOT
CDC27	0.526899	8.98973	4.4998	2.13e-05	0.000178064	NOT
UXS1	0.337631	8.52509	4.49944	2.14e-05	0.000178206	NOT
INTS2	0.485258	6.62382	4.49805	2.15e-05	0.000178998	NOT
METAP1D	0.390424	6.89296	4.49797	2.15e-05	0.000178998	NOT
CCND2	0.559947	9.71342	4.49769	2.15e-05	0.000179084	NOT
ACOX1	0.402986	8.46636	4.49744	2.15e-05	0.000179151	NOT
MANBAL	0.37039	8.57379	4.49639	2.16e-05	0.000179766	NOT
TMEM176B	0.804055	9.86868	4.49585	2.17e-05	0.00018003	NOT
ZC3HAV1	0.395938	9.13408	4.49391	2.18e-05	0.000181164	NOT
COL8A1	1.09958	9.02202	4.4939	2.18e-05	0.000181164	UP
HUS1	0.374564	6.82423	4.49313	2.19e-05	0.000181594	NOT
AGPAT3	0.505713	8.65336	4.49289	2.19e-05	0.000181652	NOT
BAK1	0.702138	6.60606	4.49122	2.21e-05	0.000182706	NOT
PARVG	0.981879	7.65734	4.48973	2.22e-05	0.000183633	NOT
SLC35B3	0.409969	8.28084	4.48864	2.23e-05	0.00018429	NOT
LPAR5	1.30965	7.15359	4.48746	2.24e-05	0.000185015	UP
SORCS2	0.878846	6.05081	4.48626	2.25e-05	0.000185754	NOT
ZNF516	0.438792	6.88393	4.4858	2.25e-05	0.000185969	NOT
NIPAL3	0.539263	7.40404	4.48562	2.25e-05	0.000185991	NOT
METRNL	0.720654	9.22273	4.4852	2.26e-05	0.000186185	NOT
ZNF44	0.448118	6.61981	4.48479	2.26e-05	0.000186313	NOT
MIS12	0.387874	7.57546	4.48472	2.26e-05	0.000186313	NOT
POLR3B	0.455461	6.75593	4.48441	2.26e-05	0.000186429	NOT
TNKS2	0.597826	8.91788	4.48312	2.27e-05	0.000187154	NOT
DNAJB14	0.564022	8.44491	4.48309	2.27e-05	0.000187154	NOT
PRR13	0.39574	9.33915	4.48107	2.29e-05	0.000188486	NOT
ST6GALNAC4	0.732787	7.36467	4.48014	2.3e-05	0.000188867	NOT
ENTPD4	0.42437	9.0647	4.48011	2.3e-05	0.000188867	NOT
YARS2	0.370276	6.64871	4.48009	2.3e-05	0.000188867	NOT
ZNF703	0.776538	8.92708	4.47847	2.31e-05	0.000189919	NOT
FHAD1	-0.921611	5.85484	-4.4782	2.32e-05	0.000189962	NOT
FPR1	1.09696	7.32861	4.47803	2.32e-05	0.000189962	UP
SLC30A7	0.477047	8.56886	4.47797	2.32e-05	0.000189962	NOT
SEPSECS	0.43005	6.8592	4.47778	2.32e-05	0.000189993	NOT
DCP1A	0.309198	7.9832	4.47672	2.33e-05	0.000190652	NOT
HSD17B4	0.390984	9.66402	4.47586	2.34e-05	0.000191166	NOT
RBMS2	0.38532	8.65917	4.47498	2.35e-05	0.000191697	NOT
ADAT2	0.543713	6.28965	4.47367	2.36e-05	0.000192472	NOT
TNRC6C	0.56115	7.24107	4.47361	2.36e-05	0.000192472	NOT
KMT2D	0.63216	9.15415	4.47313	2.36e-05	0.00019272	NOT
LZIC	0.458582	7.65933	4.47211	2.37e-05	0.000193296	NOT
OXSM	0.491227	6.56197	4.47204	2.37e-05	0.000193296	NOT
RPS6KB1	0.432957	8.63995	4.47132	2.38e-05	0.000193717	NOT
ANKRD44	0.544981	7.69756	4.47115	2.38e-05	0.000193732	NOT
E4F1	0.497492	7.52684	4.47056	2.38e-05	0.000193991	NOT
IKZF2	0.578279	5.52564	4.47051	2.39e-05	0.000193991	NOT
THOP1	0.535041	6.93113	4.46983	2.39e-05	0.000194379	NOT
NUMA1	0.412357	10.2797	4.46931	2.4e-05	0.000194652	NOT
TPCN2	0.549648	7.23727	4.46848	2.4e-05	0.000195089	NOT
TIMM23B	0.518083	7.02369	4.46836	2.4e-05	0.000195089	NOT
LPCAT1	0.747975	8.75349	4.46816	2.41e-05	0.000195089	NOT
CDC23	0.345619	7.77275	4.46813	2.41e-05	0.000195089	NOT
SELPLG	0.894356	8.71831	4.46707	2.42e-05	0.000195764	NOT
CARF	0.534297	5.96742	4.46687	2.42e-05	0.000195804	NOT
GTF2E1	0.429158	7.02432	4.46663	2.42e-05	0.000195872	NOT
HSBP1L1	0.590199	6.03253	4.46572	2.43e-05	0.000196443	NOT
RFXAP	0.457228	6.31796	4.46481	2.44e-05	0.000197011	NOT
SIPA1	0.744389	7.80691	4.46447	2.44e-05	0.00019715	NOT
PABPC1	0.335166	12.4809	4.4642	2.44e-05	0.000197249	NOT
HIC2	0.548356	6.25017	4.46373	2.45e-05	0.000197485	NOT
RABGGTA	0.522917	7.13745	4.46083	2.47e-05	0.000199551	NOT
TMEM243	0.443191	8.44428	4.46031	2.48e-05	0.000199834	NOT
BBX	0.581719	8.80101	4.45896	2.49e-05	0.000200749	NOT
IL11RA	0.517121	8.28633	4.45779	2.5e-05	0.00020153	NOT
MLX	0.406325	8.8983	4.45696	2.51e-05	0.000202049	NOT
GDPD1	0.780654	5.54842	4.4564	2.52e-05	0.000202365	NOT
SMAP2	0.514849	8.65645	4.45602	2.52e-05	0.000202545	NOT
YEATS2	0.409157	7.89587	4.45541	2.53e-05	0.000202898	NOT
AMPD3	0.797131	6.9361	4.45478	2.53e-05	0.000203271	NOT
SFT2D1	0.417475	9.20741	4.45443	2.53e-05	0.000203419	NOT
ZNF518A	0.434813	7.53072	4.45429	2.54e-05	0.000203419	NOT
LATS1	0.33117	8.3784	4.45415	2.54e-05	0.000203419	NOT
ARHGAP25	0.541273	7.11005	4.45322	2.55e-05	0.00020402	NOT
TAF2	0.401066	8.06285	4.45275	2.55e-05	0.000204274	NOT
EMC10	0.622988	8.79949	4.45198	2.56e-05	0.000204759	NOT
C5orf34	0.591331	4.85153	4.44976	2.58e-05	0.000206368	NOT
CHAMP1	0.432017	7.41455	4.44878	2.59e-05	0.000206941	NOT
PGGT1B	0.460775	7.83855	4.44873	2.59e-05	0.000206941	NOT
ZMYM6	0.350184	7.95714	4.44789	2.6e-05	0.000207485	NOT
NSF	-0.482383	7.64731	-4.44761	2.6e-05	0.00020757	NOT
PRKAG2	0.475437	7.54107	4.44749	2.6e-05	0.00020757	NOT
RIMS3	0.845304	6.18531	4.44533	2.62e-05	0.00020916	NOT
TTC4	0.533213	7.50374	4.44425	2.63e-05	0.000209896	NOT
ZSCAN29	0.429926	7.17234	4.44284	2.65e-05	0.000210799	NOT
CHMP1A	0.343955	8.6049	4.44283	2.65e-05	0.000210799	NOT
CDK13	-0.558076	9.70376	-4.44258	2.65e-05	0.000210842	NOT
UBL7-AS1	0.607954	5.12963	4.44248	2.65e-05	0.000210842	NOT
PTPRG	0.505821	9.04671	4.44148	2.66e-05	0.000211525	NOT
HAUS2	-0.552068	8.76959	-4.44013	2.68e-05	0.000212488	NOT
LRRC8B	0.510621	6.34876	4.43884	2.69e-05	0.000213412	NOT
COPS7B	0.434517	7.54491	4.43581	2.72e-05	0.000215743	NOT
CHKA	0.592006	7.36686	4.43507	2.73e-05	0.000216231	NOT
RAB40C	0.516456	7.36832	4.43436	2.73e-05	0.000216693	NOT
ZC3H12D	1.03248	5.96969	4.43395	2.74e-05	0.000216912	UP
RGS18	0.962608	5.10778	4.4313	2.77e-05	0.000218964	NOT
JADE2	0.379232	8.76145	4.4301	2.78e-05	0.000219842	NOT
TRIM11	0.553034	7.12874	4.42979	2.78e-05	0.000219978	NOT
GMIP	0.756957	7.21492	4.42954	2.78e-05	0.000220068	NOT
GTPBP6	0.472235	7.79688	4.42928	2.79e-05	0.000220164	NOT
CSTF3	0.330703	7.78055	4.42864	2.79e-05	0.00022057	NOT
ANLN	1.15379	4.51634	4.42814	2.8e-05	0.000220872	UP
CEP290	0.445602	7.26461	4.42741	2.81e-05	0.000221355	NOT
GPANK1	0.466207	7.78264	4.42677	2.81e-05	0.000221769	NOT
EXOC2	0.356601	7.24953	4.42578	2.82e-05	0.000222326	NOT
CYTH1	0.457265	9.14973	4.42576	2.82e-05	0.000222326	NOT
PLEKHO2	0.672989	9.12268	4.42558	2.83e-05	0.000222326	NOT
PHF11	0.412107	9.1821	4.42553	2.83e-05	0.000222326	NOT
TNKS1BP1	0.528712	8.62809	4.4252	2.83e-05	0.000222486	NOT
STRADA	0.33908	8.7432	4.4245	2.84e-05	0.000222951	NOT
CKAP4	0.527882	10.0714	4.42427	2.84e-05	0.000223023	NOT
AKR7A2	0.517662	9.14461	4.42352	2.85e-05	0.000223535	NOT
ATXN7L3	0.530515	7.76402	4.42331	2.85e-05	0.000223594	NOT
ZBTB48	0.753976	6.8186	4.42214	2.86e-05	0.00022446	NOT
SEC22A	0.373294	6.77017	4.4211	2.87e-05	0.00022522	NOT
MED28	0.382232	8.89782	4.42064	2.88e-05	0.000225486	NOT
RPH3AL	0.668134	6.54597	4.41922	2.89e-05	0.000226454	NOT
LAT2	0.944497	7.29124	4.41922	2.89e-05	0.000226454	NOT
KBTBD7	0.545718	6.70016	4.41869	2.9e-05	0.000226783	NOT
SGIP1	0.961479	6.18736	4.41832	2.9e-05	0.000226973	NOT
SEC24A	0.453347	8.19707	4.41717	2.92e-05	0.000227835	NOT
MMP14	0.668194	9.97244	4.41673	2.92e-05	0.000228094	NOT
CCL5	1.01916	6.88686	4.41533	2.94e-05	0.000229174	UP
MED24	-0.489585	6.26441	-4.41344	2.96e-05	0.000230684	NOT
CARD6	0.655054	7.83627	4.41328	2.96e-05	0.000230701	NOT
GOLGB1	0.290972	9.44482	4.41212	2.97e-05	0.000231583	NOT
PLCG2	0.558917	7.93297	4.41145	2.98e-05	0.000232045	NOT
OXLD1	0.469502	7.53335	4.40888	3.01e-05	0.000234168	NOT
RGL2	0.486761	9.24017	4.40861	3.01e-05	0.000234279	NOT
MIOS	0.441315	7.75331	4.40727	3.03e-05	0.000235303	NOT
DLST	0.369055	9.0265	4.40716	3.03e-05	0.000235303	NOT
NXPE1	-0.603899	2.52728	-4.40703	3.03e-05	0.000235303	NOT
RNF213	0.546857	9.28692	4.40669	3.03e-05	0.000235432	NOT
ADAT1	0.475543	7.07586	4.4066	3.04e-05	0.000235432	NOT
FEM1B	0.384727	8.74012	4.4059	3.04e-05	0.000235887	NOT
MAP3K12	0.511065	8.19634	4.4058	3.04e-05	0.000235887	NOT
MBD6	0.649196	8.53319	4.40541	3.05e-05	0.000236105	NOT
RIOK2	0.347276	7.74662	4.40514	3.05e-05	0.000236225	NOT
PSEN2	0.490692	7.26702	4.40495	3.05e-05	0.000236262	NOT
CASP10	0.614258	6.7849	4.40433	3.06e-05	0.000236688	NOT
SLC44A1	0.454783	9.42085	4.40346	3.07e-05	0.000237344	NOT
CCDC13	-0.822721	4.9186	-4.40312	3.08e-05	0.000237516	NOT
DDX55	0.436387	7.03691	4.40269	3.08e-05	0.000237657	NOT
KIAA2026	0.396025	7.8856	4.40257	3.08e-05	0.000237657	NOT
RLIM	0.341781	8.43229	4.40254	3.08e-05	0.000237657	NOT
BACH1	0.466765	8.08299	4.40112	3.1e-05	0.0002388	NOT
PLAUR	0.820584	7.83265	4.40033	3.11e-05	0.000239386	NOT
PIBF1	0.454482	6.93242	4.40003	3.11e-05	0.000239403	NOT
TYK2	0.489578	8.94686	4.40003	3.11e-05	0.000239403	NOT
CSGALNACT1	0.680216	10.1028	4.39932	3.12e-05	0.000239914	NOT
GEN1	0.571636	5.398	4.39821	3.13e-05	0.000240783	NOT
FLVCR1	0.585051	6.98749	4.39807	3.13e-05	0.000240783	NOT
TNFSF8	0.90543	7.21765	4.39699	3.15e-05	0.000241641	NOT
NCBP2	0.265088	8.76313	4.39569	3.16e-05	0.000242695	NOT
ZNF618	0.469803	7.63027	4.39549	3.16e-05	0.000242742	NOT
PHF14	0.368107	8.16412	4.39467	3.17e-05	0.000243368	NOT
WHAMMP2	-0.712603	6.55614	-4.39235	3.2e-05	0.00024536	NOT
AHCY	0.412518	8.33887	4.39206	3.21e-05	0.00024544	NOT
LOXL4	-0.691256	6.74435	-4.39199	3.21e-05	0.00024544	NOT
KCNJ14	-0.814232	4.3036	-4.3902	3.23e-05	0.000246871	NOT
GAS6	0.659967	10.8706	4.39005	3.23e-05	0.000246871	NOT
NIP7	0.3818	7.09548	4.39002	3.23e-05	0.000246871	NOT
MGRN1	0.49314	8.65786	4.3898	3.23e-05	0.000246943	NOT
TAPT1-AS1	0.682347	5.67671	4.38926	3.24e-05	0.000247311	NOT
CHM	0.444362	8.1418	4.38898	3.24e-05	0.000247441	NOT
TMPRSS3	-0.759121	2.75297	-4.38865	3.25e-05	0.000247619	NOT
USE1	0.671459	7.09763	4.38822	3.25e-05	0.000247862	NOT
TOR3A	0.427339	7.73811	4.38798	3.25e-05	0.000247862	NOT
MBTPS1	0.322988	9.52724	4.38797	3.26e-05	0.000247862	NOT
MON2	0.311054	8.75557	4.3872	3.26e-05	0.000248443	NOT
TMEM131	0.375533	8.9887	4.38666	3.27e-05	0.000248823	NOT
PIP4K2C	0.328621	7.70639	4.38649	3.27e-05	0.000248851	NOT
TSSC4	0.761701	6.82936	4.38556	3.28e-05	0.000249591	NOT
RPS6KC1	0.404566	7.81388	4.38458	3.3e-05	0.000250377	NOT
BORA	0.533615	5.4617	4.38384	3.31e-05	0.000250863	NOT
ZBTB45	0.466326	6.90531	4.38378	3.31e-05	0.000250863	NOT
LARP1	0.335909	10.1169	4.38288	3.32e-05	0.000251584	NOT
IFI6	0.920662	9.13078	4.38242	3.32e-05	0.000251888	NOT
SMARCD1	0.418158	7.7134	4.38115	3.34e-05	0.000252878	NOT
PXN	0.42433	8.68567	4.38109	3.34e-05	0.000252878	NOT
CLDN11	0.846099	7.06366	4.38	3.35e-05	0.000253778	NOT
KLHL5	0.540604	7.91234	4.37949	3.36e-05	0.000254133	NOT
TLR5	0.528586	7.56841	4.37921	3.36e-05	0.000254254	NOT
NECAP2	0.399072	8.82941	4.37899	3.37e-05	0.000254254	NOT
AP3M1	0.385733	8.59531	4.37895	3.37e-05	0.000254254	NOT
TOP2A	1.08107	5.2035	4.37784	3.38e-05	0.00025518	UP
MSH2	0.495633	6.67988	4.37751	3.39e-05	0.000255274	NOT
LPCAT4	0.77764	7.18447	4.37746	3.39e-05	0.000255274	NOT
NACC2	0.486538	8.21785	4.37731	3.39e-05	0.000255294	NOT
SLC41A1	0.474093	7.6284	4.37659	3.4e-05	0.000255843	NOT
CMTR2	0.4275	7.98699	4.37502	3.42e-05	0.000257224	NOT
MED14	0.390606	8.0674	4.37378	3.43e-05	0.000258279	NOT
SLC35D1	-0.560358	7.1825	-4.37337	3.44e-05	0.000258546	NOT
NPM3	0.548746	6.67101	4.37264	3.45e-05	0.000259119	NOT
MAPK8IP3	0.6026	8.49163	4.37204	3.46e-05	0.000259568	NOT
MPP2	-0.541925	5.61741	-4.37062	3.47e-05	0.000260812	NOT
ZDHHC13	0.526976	6.2209	4.37044	3.48e-05	0.000260859	NOT
TNS3	0.4931	10.1047	4.37022	3.48e-05	0.000260941	NOT
TBC1D8B	0.503362	6.89007	4.36925	3.49e-05	0.000261752	NOT
CCDC134	0.652177	6.01923	4.36873	3.5e-05	0.000262128	NOT
D2HGDH	0.718916	8.04194	4.36659	3.53e-05	0.000264093	NOT
RTN1	0.742966	7.65288	4.36603	3.53e-05	0.000264514	NOT
ATP6V1B2	0.472542	9.56356	4.36468	3.55e-05	0.000265714	NOT
TPGS2	0.33056	8.04712	4.36432	3.56e-05	0.000265939	NOT
VEGFB	0.655904	8.53077	4.36414	3.56e-05	0.000265975	NOT
MED30	0.433425	7.15253	4.36345	3.57e-05	0.000266529	NOT
SNAP23	0.309804	9.5871	4.36257	3.58e-05	0.000267266	NOT
RPS6KA1	0.787332	6.9404	4.36195	3.59e-05	0.000267752	NOT
P2RY14	-1.10951	7.16373	-4.36153	3.59e-05	0.000268038	DOWN
AQP3	0.98219	7.4556	4.36138	3.6e-05	0.000268042	NOT
UTP3	0.359833	8.21597	4.36098	3.6e-05	0.000268309	NOT
MTHFSD	0.422681	6.63182	4.36036	3.61e-05	0.000268796	NOT
CSNK1G2	0.481101	8.8814	4.3602	3.61e-05	0.000268823	NOT
MAN1B1	0.509503	8.76736	4.35879	3.63e-05	0.000270102	NOT
RCBTB2	0.457471	8.99074	4.35837	3.64e-05	0.00027039	NOT
NFYC	0.403297	8.20172	4.35599	3.67e-05	0.000272651	NOT
SH3PXD2A	0.561706	9.99056	4.35586	3.67e-05	0.000272651	NOT
FLVCR2	0.810695	6.72015	4.35552	3.67e-05	0.000272855	NOT
FAM122B	0.401139	8.52549	4.35124	3.73e-05	0.000277107	NOT
PHF6	0.547172	7.74293	4.34982	3.75e-05	0.000278437	NOT
MAP9	0.623735	6.489	4.34969	3.76e-05	0.000278437	NOT
ATP6V0B	0.616367	9.54164	4.34949	3.76e-05	0.000278504	NOT
DNTT	-0.575847	2.56619	-4.3488	3.77e-05	0.000279074	NOT
ZNF140	0.421198	7.16503	4.34796	3.78e-05	0.000279812	NOT
CLEC11A	1.00806	7.73291	4.34701	3.79e-05	0.000280529	UP
RAPGEF1	0.430299	8.66666	4.34694	3.79e-05	0.000280529	NOT
DHX57	0.428249	6.59136	4.34686	3.8e-05	0.000280529	NOT
TTF2	0.438073	6.29614	4.34573	3.81e-05	0.00028157	NOT
RACGAP1	0.48052	6.6352	4.34529	3.82e-05	0.000281891	NOT
JMY	0.376978	8.35827	4.34383	3.84e-05	0.000283287	NOT
MZT2B	-0.667499	8.96282	-4.34353	3.84e-05	0.000283464	NOT
DNM3OS	0.739273	8.74079	4.34327	3.85e-05	0.00028359	NOT
SP100	0.313157	9.11884	4.3426	3.86e-05	0.000284153	NOT
TSEN34	0.403737	8.17335	4.34238	3.86e-05	0.000284242	NOT
ZFP1	0.482774	6.8245	4.34212	3.86e-05	0.000284375	NOT
TRIM6	0.621794	6.28848	4.34172	3.87e-05	0.000284657	NOT
MDM2	0.331354	8.50125	4.34071	3.88e-05	0.000285593	NOT
PARP10	0.687099	8.23974	4.3401	3.89e-05	0.000286097	NOT
CBX6	0.503361	9.24153	4.33972	3.9e-05	0.000286357	NOT
TBCEL	0.348222	7.72047	4.33936	3.9e-05	0.000286387	NOT
TPMT	0.514396	7.17072	4.33928	3.9e-05	0.000286387	NOT
NME3	0.698444	8.41118	4.3392	3.91e-05	0.000286387	NOT
ZNF557	0.660405	5.10247	4.33915	3.91e-05	0.000286387	NOT
INPPL1	0.479869	8.65773	4.33883	3.91e-05	0.000286529	NOT
PFKFB2	0.553853	7.02486	4.33872	3.91e-05	0.000286529	NOT
CSPG4	0.670015	8.95628	4.33861	3.91e-05	0.000286529	NOT
POLR1C	0.437136	7.27769	4.33645	3.95e-05	0.000288702	NOT
MRPS10	0.472236	8.7219	4.33502	3.97e-05	0.000290071	NOT
RCCD1	0.414732	7.33058	4.33491	3.97e-05	0.000290071	NOT
MAN1C1	0.528061	8.74642	4.33438	3.98e-05	0.000290494	NOT
OSR2	0.673017	8.99396	4.33412	3.98e-05	0.000290633	NOT
USP40	0.346284	8.14625	4.33389	3.98e-05	0.000290738	NOT
[truncated: 12,584 more rows]
