# Supplementary material for: Integrative Multi-Omics Analysis Identifies GZMK as a Causal and Druggable Target in Knee Osteoarthritis
Source: Research Square preprint supplement (doi:10.21203/rs.3.rs-6976599/v1), 2025-07-10
Supplement: Supplementary file 2 [file 8c2b70fa9e2e300083cd8c78.docx]

**STROBE-MR checklist of recommended items to address in reports of Mendelian randomization studies**12

| **Item No.** | **Section** | **Checklist item** | **Page No.** | **Relevant text from manuscript** |
| --- | --- | --- | --- | --- |
| 1 | **TITLE and ABSTRACT** | Indicate Mendelian randomization (MR) as the study’s design in the title and/or the abstract if that is a main purpose of the study | 1 | This study aimed to identify novel biomarkers and elucidate the molecular mechanisms of knee OA by integrating RNA sequencing (RNA-seq), Mendelian Randomization (MR), and machine learning (ML) approaches. |
|  | **INTRODUCTION** |  |  |  |
| 2 | **Background** | Explain the scientific background and rationale for the reported study. What is the exposure? Is a potential causal relationship between exposure and outcome plausible? Justify why MR is a helpful method to address the study question | 2 | Expression quantitative trait loci (eQTL) analysis serves as an effective approach to link genetic variants with gene expression levels, offering a valuable perspective on the regulatory mechanisms underlying disease susceptibility. SMR leverages genetic variants as instrumental variables to assess whether changes in gene expression directly contribute to disease phenotypes. |
| 3 | **Objectives** | State specific objectives clearly, including pre-specified causal hypotheses (if any). State that MR is a method that, under specific assumptions, intends to estimate causal effects | 2 | To further infer causal relationships between gene expression and disease traits, the Summary-data-based Mendelian Randomization (SMR) method has been developed. |
|  | **METHODS** |  |  |  |
| 4 | **Study design and data sources** | Present key elements of the study design early in the article. Consider including a table listing sources of data for all phases of the study. For each data source contributing to the analysis, describe the following: | 4 | This study utilized available eQTL as proxies for the expression of identified marker genes. The eQTL summary data were obtained from the eQTLGen Consortium (<https://www.eqtlgen.org/>). The outcome of knee OA (knee OA: GCST007090), was derived from the GWAS, which included 24,955 cases of European ancestry and 378,169 controls. |
|  | a) | Setting: Describe the study design and the underlying population, if possible. Describe the setting, locations, and relevant dates, including periods of recruitment, exposure, follow-up, and data collection, when available. | 4 | All datasets and more informations are accessible through the IEU OpenGWAS project. |
|  | b) | Participants: Give the eligibility criteria, and the sources and methods of selection of participants. Report the sample size, and whether any power or sample size calculations were carried out prior to the main analysis | 4 | The outcome of knee OA (knee OA: GCST007090), was derived from the GWAS, which included 24,955 cases of European ancestry and 378,169 controls. |
|  | c) | Describe measurement, quality control and selection of genetic variants | 4 | We selected common single nucleotide polymorphisms (SNPs) (minor allele frequency [MAF] > 1%) that were significantly associated with the expression of selected genes (p < 5.0×10⁻⁸). Only cis-eQTLs were included in this study to construct genetic instruments. |
|  | d) | For each exposure, outcome, and other relevant variables, describe methods of assessment and diagnostic criteria for diseases |  | All of this information can be obtained from the original article. |
|  | e) | Provide details of ethics committee approval and participant informed consent, if relevant |  | Since this GWAS data was sourced online from a study that already obtained ethics approval and informed consent, no further action is required on my part. |
| 5 | **Assumptions** | Explicitly state the three core IV assumptions for the main analysis (relevance, independence and exclusion restriction) as well assumptions for any additional or sensitivity analysis | 4 | Since the MR method in this article is just one of several approaches, the three Mendelian assumptions are not described in detail; however, this study fully adheres to the three Mendelian assumptions. In sensitivity analyses, the HEIDI test (heterogeneity in dependent instruments) implemented in the SMR software was applied to evaluate whether the association between gene expression and the outcome was driven by linkage. |
| 6 | **Statistical methods: main analysis** | Describe statistical methods and statistics used |  |  |
|  | a) | Describe how quantitative variables were handled in the analyses (i.e., scale, units, model) |  | In the SMR analysis, quantitative variables like effect sizes and standard errors from GWAS data were used on their original scale, without transformation. |
|  | b) | Describe how genetic variants were handled in the analyses and, if applicable, how their weights were selected | 4 | We selected common single nucleotide polymorphisms (SNPs) (minor allele frequency [MAF] > 1%) that were significantly associated with the expression of selected genes (p < 5.0×10⁻⁸). Only cis-eQTLs were included in this study to construct genetic instruments |
|  | c) | Describe the MR estimator (e.g. two-stage least squares, Wald ratio) and related statistics. Detail the included covariates and, in case of two-sample MR, whether the same covariate set was used for adjustment in the two samples | 4 | In my SMR analysis, the MR estimator is based on the Wald ratio, where the causal effect is estimated as the ratio of the variant-outcome effect to the variant-exposure effect. Related statistics include p-values and the HEIDI test for heterogeneity. No covariates were explicitly included in the SMR model, as it relies on summary data without additional adjustment. |
|  | d) | Explain how missing data were addressed |  | No missing data |
|  | e) | If applicable, indicate how multiple testing was addressed | 4 | results were considered reliable when genes passed both the SMR test (HEIDI p > 0.05) and FDR correction (p < 0.05). |
| 7 | **Assessment of assumptions** | Describe any methods or prior knowledge used to assess the assumptions or justify their validity | 4 | In my SMR analysis, the validity of Mendelian Randomization assumptions was assessed using the HEIDI (Heterogeneity in Dependent Instruments) test to check for pleiotropy, ensuring the genetic variants affect the outcome only through the exposure. Prior knowledge from GWAS data confirmed variant-exposure associations (p < 5 × 10⁻⁸), supporting the relevance assumption, while the use of independent variants (via LD pruning) addressed the independence assumption. |
| 8 | **Sensitivity analyses and additional analyses** | Describe any sensitivity analyses or additional analyses performed (e.g. comparison of effect estimates from different approaches, independent replication, bias analytic techniques, validation of instruments, simulations) | 4,5 | In sensitivity analyses, the HEIDI test (heterogeneity in dependent instruments) implemented in the SMR software was applied to evaluate whether the association between gene expression and the outcome was driven by linkage. The overlapping genes were further validated using Bayesian colocalization analysis (COLOC) to assess the posterior probability of causal variants within genomic regions. |
| 9 | **Software and pre-registration** |  |  |  |
|  | a) | Name statistical software and package(s), including version and settings used | 5 | SMR analyses were conducted using SMR software. Packages such as gassocplot2, coloc, and plinkbinr to perform colocalization analyses. |
|  | b) | State whether the study protocol and details were pre-registered (as well as when and where) |  | For my SMR analysis, the study protocol and details were not pre-registered, as this was not deemed necessary for the nature of this research. |
|  | **RESULTS** |  |  |  |
| 10 | **Descriptive data** |  |  |  |
|  | a) | Report the numbers of individuals at each stage of included studies and reasons for exclusion. Consider use of a flow diagram | 4 | The outcome of knee OA (knee OA: GCST007090), was derived from the GWAS, which included 24,955 cases of European ancestry and 378,169 controls |
|  | b) | Report summary statistics for phenotypic exposure(s), outcome(s), and other relevant variables (e.g. means, SDs, proportions) | 6 | In this study, SMR analysis was employed to identify genes specifically associated with knee OA. The SMR results identified 61 genes, including UQCC1, USP8, BMP6, and GZMK, that showed significant associations with OA susceptibility (P_HEIDI > 0.05, P_FDR < 0.05) |
|  | c) | If the data sources include meta-analyses of previous studies, provide the assessments of heterogeneity across these studies |  | The data sources for my SMR analysis do not include meta-analyses of previous studies, so no assessments of heterogeneity across studies were conducted. |
|  | d) | For two-sample MR:  i.  Provide justification of the similarity of the genetic variant-exposure associations between the exposure and outcome samples  ii.  Provide information on the number of individuals who overlap between the exposure and outcome studies | 4 | The exposure and the outcome come from different cohort studies, minimizing the possibility of sample overlap. |
| 11 | **Main results** |  |  |  |
|  | a) | Report the associations between genetic variant and exposure, and between genetic variant and outcome, preferably on an interpretable scale | 6 | In this study, SMR analysis was employed to identify genes specifically associated with knee OA. The SMR results identified 61 genes, including UQCC1, USP8, BMP6, and GZMK, that showed significant associations with OA susceptibility (P_HEIDI > 0.05, P_FDR < 0.05). |
|  | b) | Report MR estimates of the relationship between exposure and outcome, and the measures of uncertainty from the MR analysis, on an interpretable scale, such as odds ratio or relative risk per SD difference | 6 | Further examination of the SMR effect sizes (β-SMR) categorized these 61 genes into two groups based on the direction of their association with OA. The first group consisted of 34 genes with negative β-SMR values, indicating a potential protective effect against OA. |
|  | c) | If relevant, consider translating estimates of relative risk into absolute risk for a meaningful time period |  | Examples of genes in this group included ABCB9, USP8, CORO1A, and ATAD5, among others, with β-SMR values ranging from -0.04 to -0.92, as reported in Supplementary Table 2. The second group comprised 27 genes with positive β-SMR values, suggesting a propensity to promote OA susceptibility. Notable genes in this group included ZFP57, GZMK, UQCC1, and IPP, with β-SMR values ranging from 0.04 to 0.79, as specified in Supplementary Table 2. |
|  | d) | Consider plots to visualize results (e.g. forest plot, scatterplot of associations between genetic variants and outcome versus between genetic variants and exposure) | Fig. 2 | Figure 2. SMR analysis identifying OA-associated genes. |
| 12 | **Assessment of assumptions** |  |  |  |
|  | a) | Report the assessment of the validity of the assumptions | 6 | In this study, SMR analysis was employed to identify genes specifically associated with knee OA. The SMR results identified 61 genes, including UQCC1, USP8, BMP6, and GZMK, that showed significant associations with OA susceptibility (P_HEIDI > 0.05, P_FDR < 0.05) |
|  | b) | Report any additional statistics (e.g., assessments of heterogeneity across genetic variants, such as *I2*, Q statistic or E-value) | 6 | Further colocalization analysis demonstrated that the posterior probability for the colocalization hypothesis (H4) in the analysis of GZMK reached 92.28%, significantly higher than other hypotheses |
| 13 | **Sensitivity analyses and additional analyses** |  |  |  |
|  | a) | Report any sensitivity analyses to assess the robustness of the main results to violations of the assumptions | 6 | P_HEIDI > 0.05 |
|  | b) | Report results from other sensitivity analyses or additional analyses | 6 | Further colocalization analysis demonstrated that the posterior probability for the colocalization hypothesis (H4) in the analysis of GZMK reached 92.28%, significantly higher than other hypotheses. |
|  | c) | Report any assessment of direction of causal relationship (e.g., bidirectional MR) |  | In this study, we applied the SMR (Summary-data-based Mendelian Randomization) method, which is designed to assess the causal effect of gene expression on the outcome using eQTL as an instrumental variable. By its methodological design, SMR inherently assumes a unidirectional causal relationship from exposure to outcome. Thus, bidirectional MR was not performed in our analysis. |
|  | d) | When relevant, report and compare with estimates from non-MR analyses | 7 | We also performed RNA-seq analysis, which identified GZMK as a significant gene, consistent with our SMR findings. |
|  | e) | Consider additional plots to visualize results (e.g., leave-one-out analyses) |  | We did not perform a leave-one-out analysis, as it is not a standard procedure in SMR analysis. |
|  | **DISCUSSION** |  |  |  |
| 14 | **Key results** | Summarize key results with reference to study objectives | 8 | The genetic evidence from our SMR and colocalization analyses provides robust support for GZMK’s causal association with OA. |
| 15 | **Limitations** | Discuss limitations of the study, taking into account the validity of the IV assumptions, other sources of potential bias, and imprecision. Discuss both direction and magnitude of any potential bias and any efforts to address them | 9 | SMR and colocalization analyses rely on external eQTL and GWAS data, which may not fully capture synovial-specific effects, a challenge highlighted in tissue-specific genetic studies. |
| 16 | **Interpretation** |  |  |  |
|  | a) | Meaning: Give a cautious overall interpretation of results in the context of their limitations and in comparison with other studies | 7 | In this study, we employed an integrative multi-omics approach, combining RNA-seq of synovial tissue, genetic association analyses, and ML model, to elucidate the molecular mechanisms underlying knee OA. Our findings identified GZMK as a pivotal gene with a strong causal link to OA pathogenesis, validated through differential expression analysis, SMR, Bayesian colocalization, and predictive modelling with LASSO and Random Forest. |
|  | b) | Mechanism: Discuss underlying biological mechanisms that could drive a potential causal relationship between the investigated exposure and the outcome, and whether the gene-environment equivalence assumption is reasonable. Use causal language carefully, clarifying that IV estimates may provide causal effects only under certain assumptions | 8 | GZMK (encoding granzyme K), is a serine protease expressed by cytotoxic lymphocytes like NK cells and CD8+ T cells, known to induce pro-inflammatory cytokine release and matrix degradation. This aligns with prior evidence linking granzymes to arthritic inflammation, with studies reporting elevated granzyme expression in inflamed synovial tissues across multiple conditions. GZMK has been demonstrated to trigger the release of pro-inflammatory cytokines, including IL-1β, TNF-α, IL-6, IL-8, and CCL2, these cytokines are key mediators of synovial inflammation, driving immune cell recruitment, fibroblast activation, and angiogenesis in OA |
|  | c) | Clinical relevance: Discuss whether the results have clinical or public policy relevance, and to what extent they inform effect sizes of possible interventions | 8 | Compared to classical OA susceptibility genes such as RUNX2, which are primarily involved in cartilage homeostasis and bone remodeling, GZMK may represent an immune-driven mechanism of OA, linking genetic predisposition to chronic inflammation |
| 17 | **Generalizability** | Discuss the generalizability of the study results (a) to other populations, (b) across other exposure periods/timings, and (c) across other levels of exposure |  | Although we did not conduct a detailed analysis of generalizability, our MR findings are based on genetic variants, which are generally stable across populations. Therefore, the results may be applicable to other populations with similar genetic backgrounds. However, further validation in diverse cohorts and across different exposure periods or levels would be beneficial to confirm the robustness of our conclusions. |
|  | **OTHER INFORMATION** |  |  |  |
| 18 | **Funding** | Describe sources of funding and the role of funders in the present study and, if applicable, sources of funding for the databases and original study or studies on which the present study is based | 9 | No specific funding was received for this study. |
| 19 | **Data and data sharing** | Provide the data used to perform all analyses or report where and how the data can be accessed, and reference these sources in the article. Provide the statistical code needed to reproduce the results in the article, or report whether the code is publicly accessible and if so, where | 9 | The original contributions presented in the study are included in the article/[Supplementary Material](https://www.ncbi.nlm.nih.gov/pmc/articles/PMC10883046/#s12). Further inquiries can be directed to the corresponding author. |
| 20 | **Conflicts of Interest** | All authors should declare all potential conflicts of interest | 10 | The authors declare no conflict of interest. |

This checklist is copyrighted by the Equator Network under the Creative Commons Attribution 3.0 Unported (CC BY 3.0) license.

1. Skrivankova VW, Richmond RC, Woolf BAR, Yarmolinsky J, Davies NM, Swanson SA, et al. Strengthening the Reporting of Observational Studies in Epidemiology using Mendelian Randomization (STROBE-MR) Statement. JAMA. 2021;under review.

2. Skrivankova VW, Richmond RC, Woolf BAR, Davies NM, Swanson SA, VanderWeele TJ, et al. Strengthening the Reporting of Observational Studies in Epidemiology using Mendelian Randomisation (STROBE-MR): Explanation and Elaboration. BMJ. 2021;375:n2233.
