# Supplementary material for: Integrative Multi-Omics Analysis Identifies GZMK as a Causal and Druggable Target in Knee Osteoarthritis
Source: Research Square preprint supplement (doi:10.21203/rs.3.rs-6976599/v1), 2025-07-10
Supplement: Supplementary file 3 [file e1af3cd4eb7cf8cb6ba6943d.xlsx]

## Sheet: Sheet1
Results of SMR Analysis Identifying OA-Associated Genes
gene_id	Gene	ProbeChr	Probe_bp	topSNP	topSNP_chr	topSNP_bp	A1	A2	Freq	b_GWAS	se_GWAS	p_GWAS	b_eQTL	se_eQTL	p_eQTL	b_SMR	se_SMR	p_SMR	p_HEIDI	nsnp_HEIDI	fdr
ENSG00000101019	UQCC1	20	33945156	rs4911178	20	33952620	G	A	0.377734	-0.0903	0.0096	5.4e-21	-0.456025	0.0083381	0	0.198016	0.0213606	1.86e-20	0.0699	20	2.6e-16
ENSG00000126001	CEP250	20	34071394	rs6060442	20	34093757	T	C	0.250497	-0.0761	0.0111	8.44e-12	-0.17733	0.00894783	2.07e-87	0.429144	0.0662349	9.23e-11	0.363	20	6.46e-07
ENSG00000150967	ABCB9	12	123435847	rs11608811	12	123529056	A	G	0.308151	-0.05	0.0103	1.14e-06	0.290492	0.00858476	5.43e-251	-0.172122	0.0358201	1.55e-06	0.126	20	0.00216876
ENSG00000138592	USP8	15	50754928	rs11633608	15	50774431	A	G	0.182903	0.0602	0.0124	1.17e-06	-0.438022	0.0158998	4.56e-167	-0.137436	0.0287453	1.74e-06	0.0951	20	0.00221328
ENSG00000185862	EVI2B	17	29635957	rs9902893	17	29625638	A	G	0.2833	0.0503	0.0101	5.98e-07	-0.117582	0.00853514	3.54e-43	-0.427787	0.0913382	2.82e-06	0.29	20	0.00281839
ENSG00000238024	DDX39BP2	6	29961184	rs387642	6	29645634	T	C	0.187873	0.0523	0.0108	1.18e-06	0.44968	0.0265163	1.66e-64	0.116305	0.0249771	3.22e-06	0.251	20	0.00284213
ENSG00000182463	TSHZ2	20	51848214	rs2741389	20	52100468	T	C	0.345924	-0.0465	0.0097	1.76e-06	-0.182647	0.00938569	2.39e-84	0.254589	0.0546954	3.25e-06	0.0954	20	0.00284213
ENSG00000188690	UROS	10	127494481	rs10901446	10	127502347	G	T	0.441352	-0.0411	0.0093	1e-05	-0.541755	0.00735532	0	0.0758646	0.0171973	1.03e-05	0.647	20	0.00741576
ENSG00000228223	HCG11	6	26524441	rs4343916	6	26522675	A	T	0.435388	-0.0426	0.0095	7.38e-06	0.414182	0.0170896	9.29e-130	-0.102853	0.0233261	1.04e-05	0.0882	20	0.00741576
ENSG00000103653	CSK	15	75084968	rs34862454	15	75101530	C	T	0.395626	-0.0436	0.0099	9.98e-06	0.337667	0.00797334	0	-0.129121	0.0294769	1.18e-05	0.253	20	0.007632
ENSG00000227533	SLC2A1-DT	1	43436874	rs3768037	1	43412662	A	C	0.164016	0.0541	0.0123	1.04e-05	0.957849	0.0209541	0	0.0564807	0.0129006	1.2e-05	0.822	20	0.007632
ENSG00000196712	NF1	17	29565539	rs12943365	17	29680526	C	G	0.372763	0.0425	0.0095	7.86e-06	0.220734	0.0120183	2.44e-75	0.19254	0.0442967	1.38e-05	0.167	20	0.0080454
ENSG00000126861	OMG	17	29611794	rs2952994	17	29422861	A	T	0.286282	0.0516	0.0101	3.33e-07	0.0704595	0.00863325	3.31e-16	0.732336	0.169114	1.49e-05	0.721	20	0.00833923
ENSG00000004534	RBM6	3	50057459	rs2245365	3	50097319	A	C	0.478131	-0.0398	0.0093	1.88e-05	0.754537	0.00740638	0	-0.0527476	0.0123363	1.9e-05	0.887	20	0.00945666
ENSG00000089876	DHX32	10	127554955	rs11244686	10	127568260	A	G	0.402584	-0.0402	0.0094	1.71e-05	-0.671404	0.0070414	0	0.0598745	0.0140146	1.93e-05	0.812	20	0.00945666
ENSG00000120833	SOCS2	12	93970426	rs7953280	12	94136009	G	C	0.502982	-0.0401	0.0093	1.68e-05	0.247772	0.0078651	7.98e-218	-0.161842	0.0378845	1.94e-05	0.149	20	0.00945666
ENSG00000143093	STRIP1	1	110585731	rs10745307	1	110580215	G	A	0.470179	-0.0449	0.0093	1.57e-06	-0.133594	0.0156013	1.1e-17	0.336094	0.0799165	2.6e-05	0.805	20	0.0117352
ENSG00000124562	SNRPC	6	34733377	rs3798352	6	34734809	A	T	0.335984	0.0412	0.0099	3.08e-05	-0.289484	0.00836359	1.64e-262	-0.142322	0.0344451	3.6e-05	0.0828	20	0.015264
ENSG00000197429	IPP	1	46188159	rs3935296	1	46180470	T	C	0.286282	-0.044	0.0106	3.5e-05	-0.363791	0.0101263	1.23e-282	0.120949	0.0293315	3.73e-05	0.883	16	0.01535
ENSG00000090975	PITPNM2	12	123551294	rs7975763	12	123604053	T	C	0.215706	-0.0594	0.0115	2.64e-07	0.0648861	0.00968103	2.05e-11	-0.91545	0.223757	4.29e-05	0.299	20	0.0171502
ENSG00000138623	SEMA7A	15	74714219	rs12903353	15	74721270	G	C	0.455268	0.0452	0.0093	1.19e-06	0.0570113	0.00797495	8.75e-13	0.792825	0.197255	5.84e-05	0.667	20	0.0220847
ENSG00000124688	MAD2L1BP	6	43602983	rs111549887	6	43469519	G	C	0.33499	-0.0425	0.0106	6e-05	0.480224	0.0087418	0	-0.0885005	0.0221318	6.37e-05	0.196	20	0.02332
ENSG00000153162	BMP6	6	7804342	rs9406052	6	7700988	C	T	0.457256	-0.0385	0.0093	3.83e-05	0.120538	0.00793933	4.63e-52	-0.319401	0.0799708	6.5e-05	0.0853	20	0.02332
ENSG00000102879	CORO1A	16	30197272	rs7199462	16	30158757	G	T	0.54672	-0.0381	0.0093	4.33e-05	0.13145	0.00793549	1.25e-61	-0.289845	0.0728811	6.98e-05	0.519	20	0.0237864
ENSG00000159588	CCDC17	1	46087722	rs2275085	1	46085852	C	T	0.284294	-0.0414	0.0101	4.27e-05	-0.142412	0.00875263	1.59e-59	0.290705	0.0731367	7.04e-05	0.922	15	0.0237864
ENSG00000239557	PPP2R5CP	3	52408283	rs13094687	3	52450043	G	A	0.353877	0.044	0.01	1.11e-05	0.155799	0.0168829	2.75e-20	0.282415	0.0711079	7.14e-05	0.0955	20	0.0237864
ENSG00000113088	GZMK	5	54325239	rs6891823	5	54317900	C	T	0.455268	-0.0377	0.0094	5.57e-05	-0.174961	0.00797909	1.42e-106	0.215477	0.0546177	7.97e-05	0.924	20	0.0247814
ENSG00000107949	BCCIP	10	127527189	rs10901435	10	127481908	T	C	0.558648	0.0392	0.0098	6.13e-05	-0.176116	0.00849783	2.07e-95	-0.222581	0.0566721	8.58e-05	0.116	20	0.0260981
ENSG00000102882	MAPK3	16	30130126	rs55732507	16	30141985	C	T	0.437376	-0.0373	0.0095	9.06e-05	0.508772	0.00767103	0	-0.0733137	0.0187051	8.87e-05	0.371	20	0.0262933
ENSG00000138621	PPCDC	15	75362849	rs4886417	15	75330159	G	T	0.417495	0.0404	0.0093	1.39e-05	-0.0727472	0.00804637	1.55e-19	-0.555348	0.141831	9.02e-05	0.0697	20	0.0262933
ENSG00000163346	PBXIP1	1	154922575	rs11264291	1	154914797	T	C	0.437376	-0.0374	0.0094	6.92e-05	-0.167211	0.0079675	8.69e-98	0.22367	0.0572179	9.26e-05	0.0609	20	0.026442
ENSG00000141696	P3H4	17	39963527	rs11654169	17	39954385	T	C	0.207753	0.0501	0.0118	2.16e-05	0.106467	0.0109791	3.1e-22	0.470568	0.12099	0.000101	0.323	20	0.0274458
ENSG00000204644	ZFP57	6	29644528	rs416568	6	29647628	A	T	0.246521	0.0393	0.0101	9.43e-05	0.947867	0.0138048	0	0.0414615	0.0106726	0.000102	0.0999	20	0.0274458
ENSG00000230795	HLA-K	6	29895622	rs416568	6	29647628	A	T	0.246521	0.0393	0.0101	9.43e-05	-0.844117	0.0193767	0	-0.0465575	0.0120128	0.000106	0.123	20	0.027984
ENSG00000141349	G6PC3	17	42150906	rs1684660	17	42108351	T	A	0.479125	0.0365	0.0093	8.91e-05	0.17944	0.00794518	6.11e-113	0.20341	0.0526046	0.00011	0.318	20	0.027984
ENSG00000163344	PMVK	1	154903338	rs2335408	1	154915977	A	G	0.437376	-0.0371	0.0094	7.76e-05	-0.145386	0.00794798	9.55e-75	0.255183	0.0661434	0.000114	0.112	20	0.027984
ENSG00000102886	GDPD3	16	30120654	rs57149692	16	30142021	C	G	0.437376	-0.0372	0.0095	9.67e-05	0.177536	0.00811986	5.67e-106	-0.209535	0.0543617	0.000116	0.522	20	0.027984
ENSG00000107745	MICU1	10	74256498	rs12779570	10	74177771	C	T	0.392644	0.0382	0.0098	9.22e-05	0.240682	0.00947389	2.23e-142	0.158716	0.0411941	0.000117	0.0665	20	0.027984
ENSG00000133794	BMAL1	11	13353506	rs2219998	11	13292864	G	A	0.426441	-0.0363	0.0094	0.000104	0.377583	0.0077744	0	-0.0961378	0.0249738	0.000118	0.165	20	0.027984
ENSG00000183604	SMG1P5	16	30290462	rs8050176	16	30326571	C	G	0.431412	0.0359	0.0093	0.000122	-0.639158	0.0171799	5.92e-303	-0.0561676	0.0146285	0.000123	0.281	20	0.0286836
ENSG00000228506	PNISR-AS1	6	99876023	rs6570064	6	99883137	G	A	0.493042	-0.0357	0.0093	0.000126	0.94331	0.0142106	0	-0.0378455	0.00987537	0.000127	0.387	20	0.0291309
ENSG00000182179	UBA7	3	49847009	rs7374277	3	49784777	T	C	0.474155	0.0355	0.0093	0.000127	-0.582424	0.00732751	0	-0.0609522	0.0159862	0.000137	0.052	20	0.0297061
ENSG00000242372	EIF6	20	33869751	rs3752316	20	33865852	A	G	0.0675944	-0.0663	0.0174	0.000135	0.824548	0.0134923	0	-0.0804077	0.0211435	0.000143	0.427	20	0.0302146
ENSG00000169203	NPIPB12	16	29506165	rs8050176	16	30326571	C	G	0.431412	0.0359	0.0093	0.000122	0.398576	0.0184562	1.97e-103	0.0900706	0.0237029	0.000145	0.383	20	0.0302146
ENSG00000234329	RPL7AP16	1	46117104	rs11211168	1	46163647	T	C	0.2833	-0.0389	0.0101	0.000124	0.44869	0.0200833	1.46e-110	-0.0866969	0.022842	0.000147	0.186	17	0.0302146
ENSG00000148719	DNAJB12	10	74103788	rs9416018	10	74100642	G	A	0.420477	0.0366	0.0096	0.00013	0.305178	0.00826003	8.32e-299	0.11993	0.031624	0.000149	0.446	20	0.0302146
ENSG00000261740	BOLA2-SMG1P6	16	29460261	rs11150585	16	30184286	G	A	0.570577	-0.0392	0.0098	6.39e-05	0.507963	0.0441577	1.27e-30	-0.0771709	0.0204258	0.000158	0.672	14	0.0313342
ENSG00000214113	LYRM4	6	5184912	rs72811688	6	5170707	T	C	0.0964215	-0.0617	0.0163	0.000155	0.784165	0.0135665	0	-0.0786824	0.020831	0.000159	0.168	20	0.0313342
ENSG00000185614	INKA1	3	49841575	rs2352974	3	49890613	T	C	0.466203	0.0361	0.0093	0.000105	-0.137057	0.00886776	6.92e-54	-0.263395	0.0699625	0.000167	0.0838	20	0.0322184
ENSG00000086015	MAST2	1	46377227	rs66682726	1	46142903	C	G	0.2833	-0.0388	0.0101	0.000123	-0.146266	0.00912772	8.63e-58	0.26527	0.0710088	0.000187	0.106	17	0.0339806
ENSG00000204613	TRIM10	6	30124216	rs144447022	6	29244219	T	G	0.0695825	0.0554	0.0143	0.00011	-0.302211	0.0221682	2.56e-42	-0.183316	0.0491916	0.000194	0.106	20	0.0348006
ENSG00000144214	LYG1	2	99910953	rs7589365	2	99990324	T	C	0.445328	0.0352	0.0094	0.000168	0.403536	0.0115548	3.26e-267	0.087229	0.0234276	0.000197	0.425	20	0.0348914
ENSG00000015133	CCDC88C	14	91810927	rs1285834	14	91873553	A	C	0.459245	0.0374	0.0095	7.92e-05	-0.0968915	0.00881361	4.11e-28	-0.385999	0.104145	0.00021	0.535	20	0.036621
ENSG00000160584	SIK3	11	116841635	rs12281729	11	116838130	C	A	0.0636183	0.0775	0.0202	0.000124	-0.240096	0.0168735	6.04e-46	-0.322788	0.0871377	0.000212	0.555	20	0.036621
ENSG00000227373	RABGAP1L-DT	1	174106790	rs4650950	1	174103402	A	G	0.274354	-0.0391	0.0104	0.00017	0.432768	0.0231613	6.56e-78	-0.0903485	0.024513	0.000228	0.225	3	0.0389046
ENSG00000162063	CCNF	16	2494125	rs12932220	16	2500604	C	G	0.372763	0.0379	0.01	0.000139	0.143837	0.00942486	1.38e-52	0.263494	0.0716351	0.000235	0.4	20	0.0394774
ENSG00000125319	HROB	17	42229559	rs730228	17	42239349	C	T	0.302187	0.0389	0.0103	0.000153	-0.135461	0.00894997	9.46e-52	-0.287167	0.0783678	0.000248	0.653	20	0.0408237
ENSG00000176208	ATAD5	17	29190937	rs57775678	17	29190751	T	C	0.107356	-0.0563	0.015	0.000177	0.204084	0.0127082	4.93e-58	-0.275866	0.0754798	0.000257	0.444	14	0.0416543
ENSG00000134077	THUMPD3	3	9416500	rs62246267	3	9403161	A	G	0.149105	0.043	0.0118	0.000265	-0.455684	0.0102564	0	-0.0943637	0.0259821	0.000281	0.0545	20	0.044679
ENSG00000111145	ELK3	12	96625886	rs4762139	12	96617906	G	C	0.234592	0.0418	0.011	0.000144	-0.198721	0.0175561	1.05e-29	-0.210345	0.05839	0.000315	0.636	20	0.048972
ENSG00000233609	RPL10P19	8	8827622	rs6994163	8	8820969	A	G	0.353877	0.035	0.0097	0.000305	0.728415	0.0172196	0	0.0480495	0.0133649	0.000324	0.167	20	0.0498177
